# Supplementary material for: ERK5 Is a Major Determinant of Chemical Sarcomagenesis: Implications in Human Pathology
Source: Cancers (Basel). 2022 Jul 19;14(14):3509. doi: 10.3390/cancers14143509 (PMC9316148; doi:10.3390/cancers14143509)

# Western Blot Figures

# Figura 2 (A)

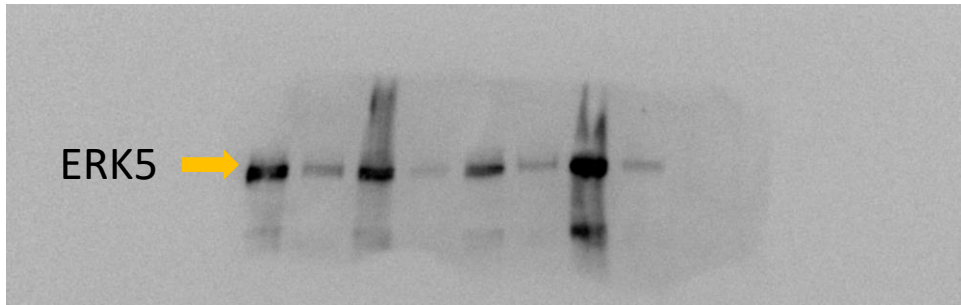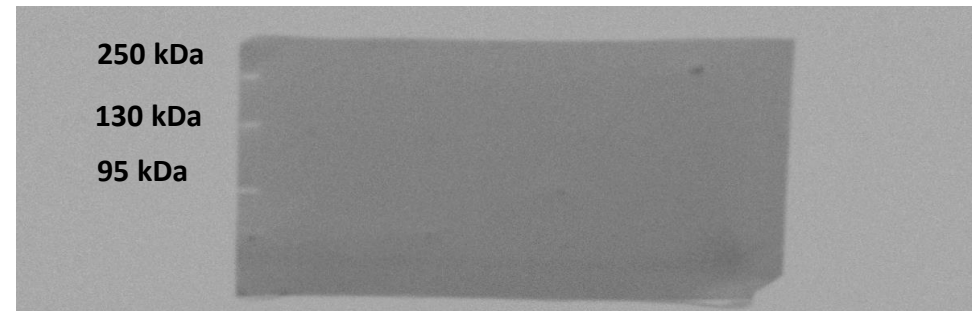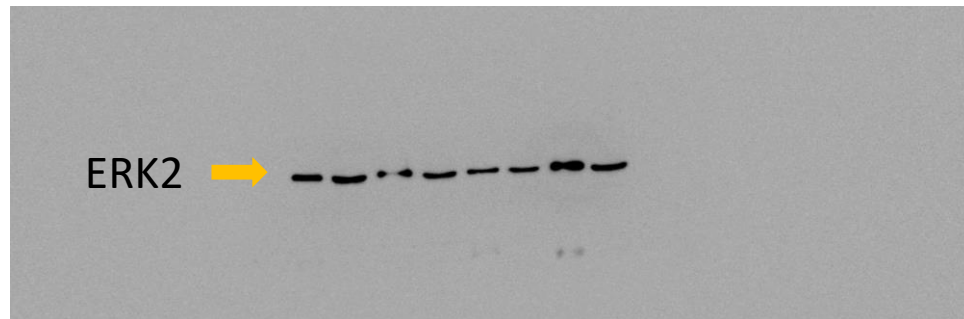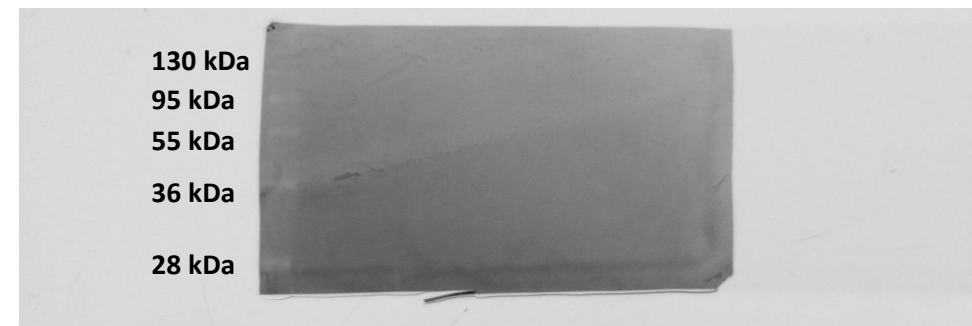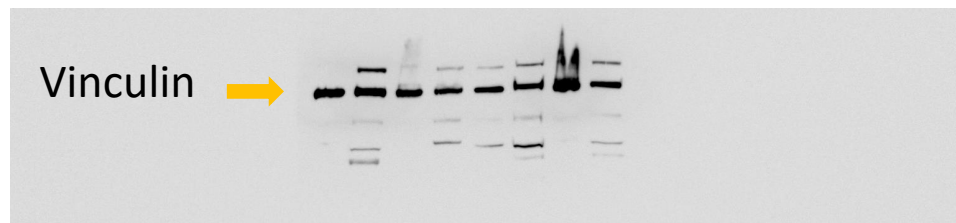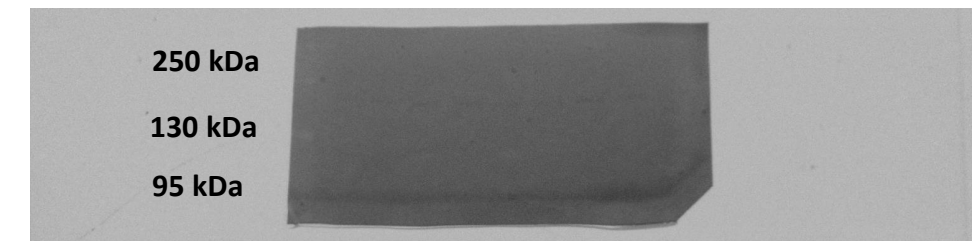

# Figure 3 (A)

ERK5

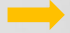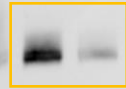

Vinculin

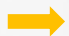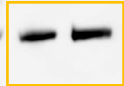

250 kDa

130 kDa

95 kDa

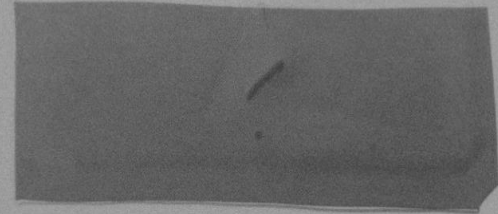

250 kDa

130 kDa

95 kDa

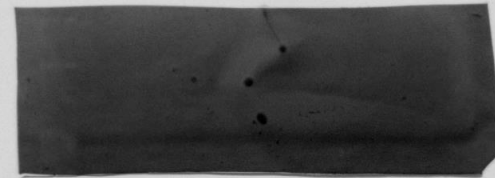

# Figure 3 (G)

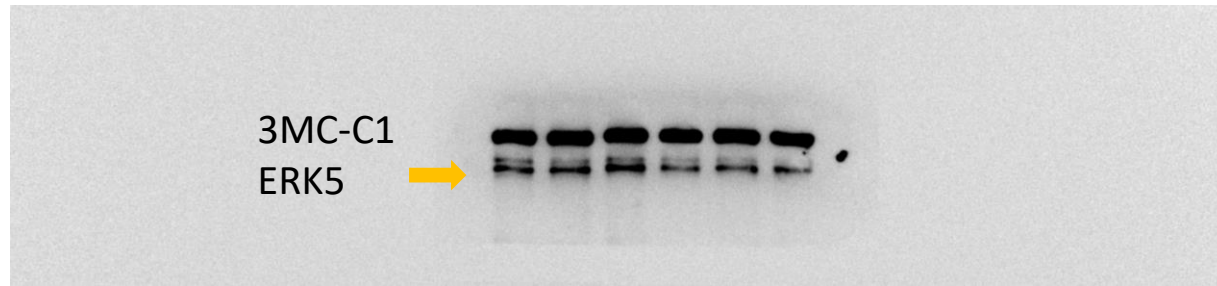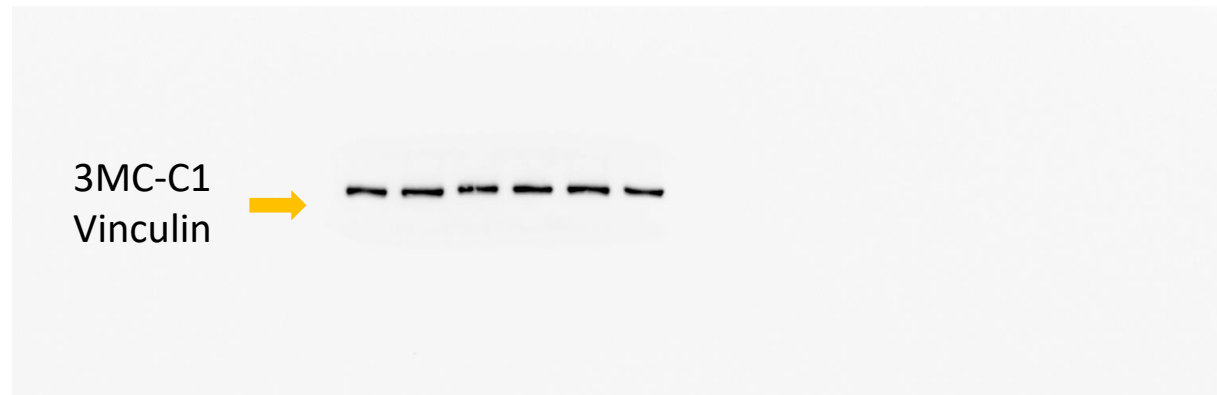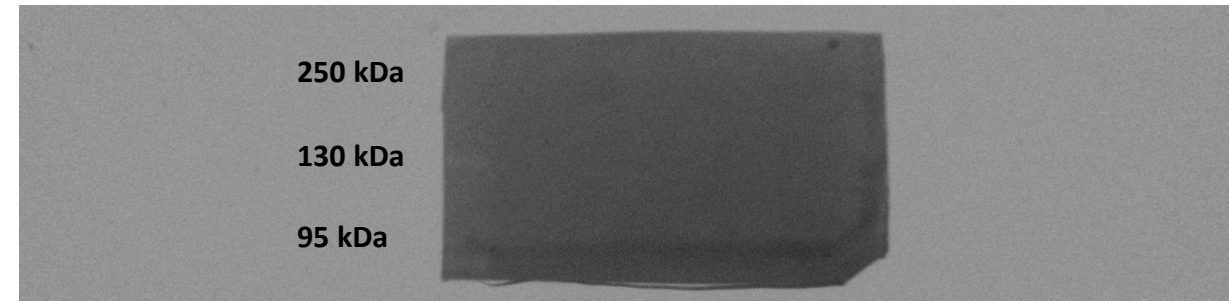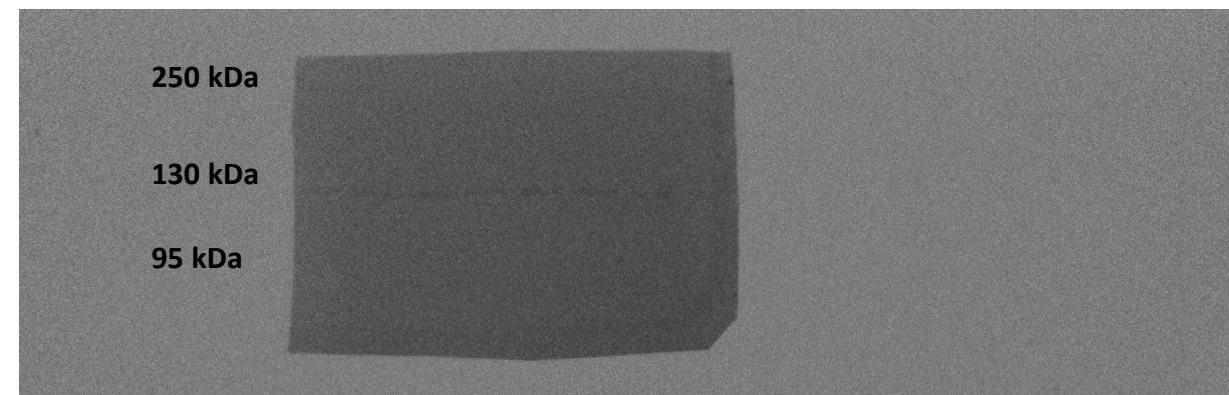

# Figure 4 (A)

ERK5

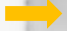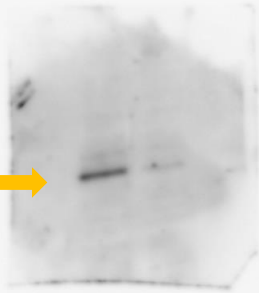

Vinculin

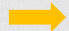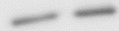

250 kDa

130 kDa

95 kDa

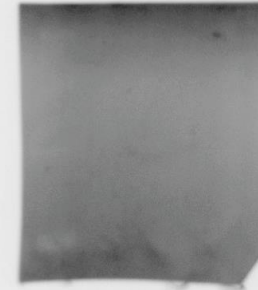

250 kDa

130 kDa

95 kDa

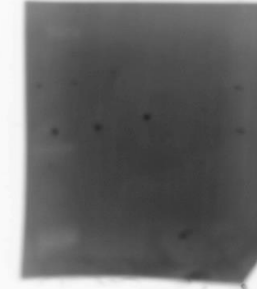

# Figure 4 (G)

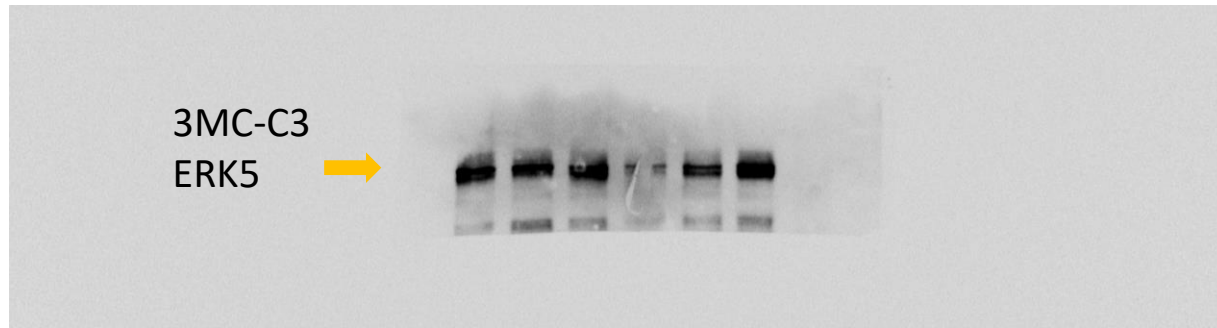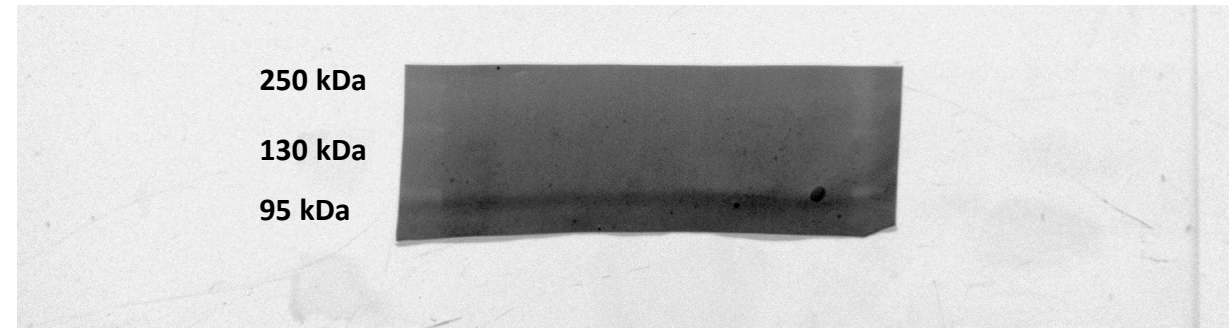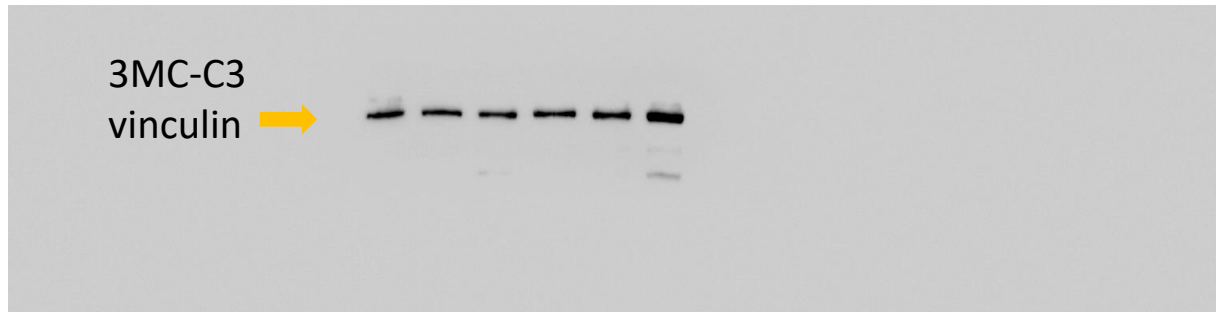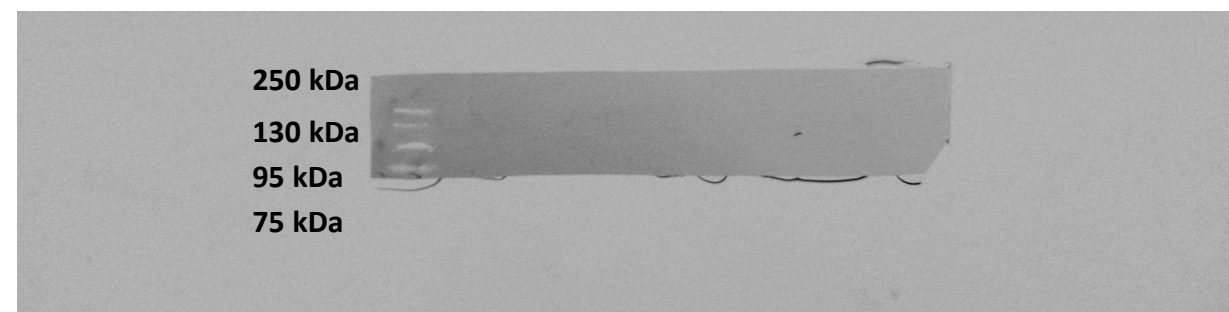

# Supplementary Figure 2 (C)

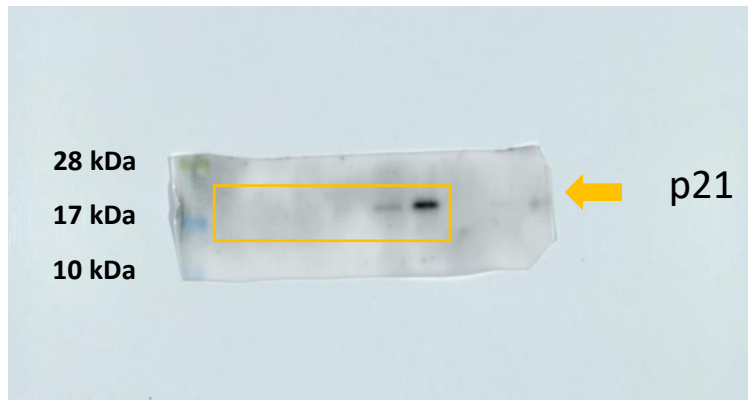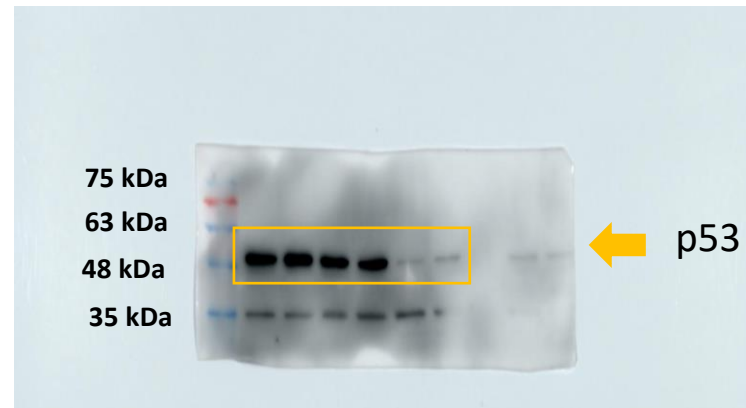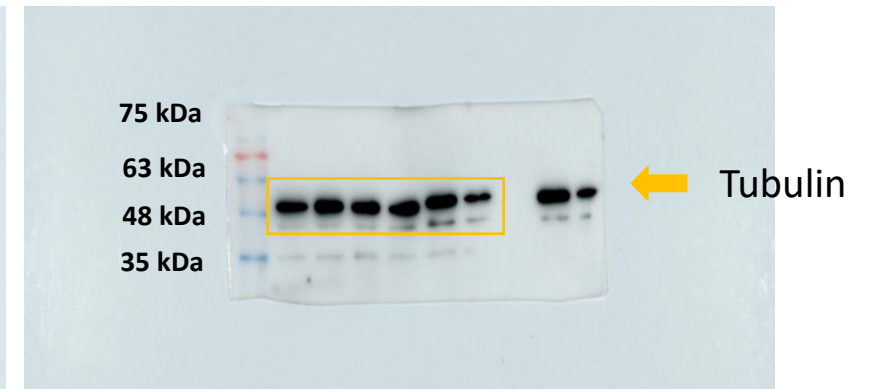

# Supplementary Figure 2 (D)

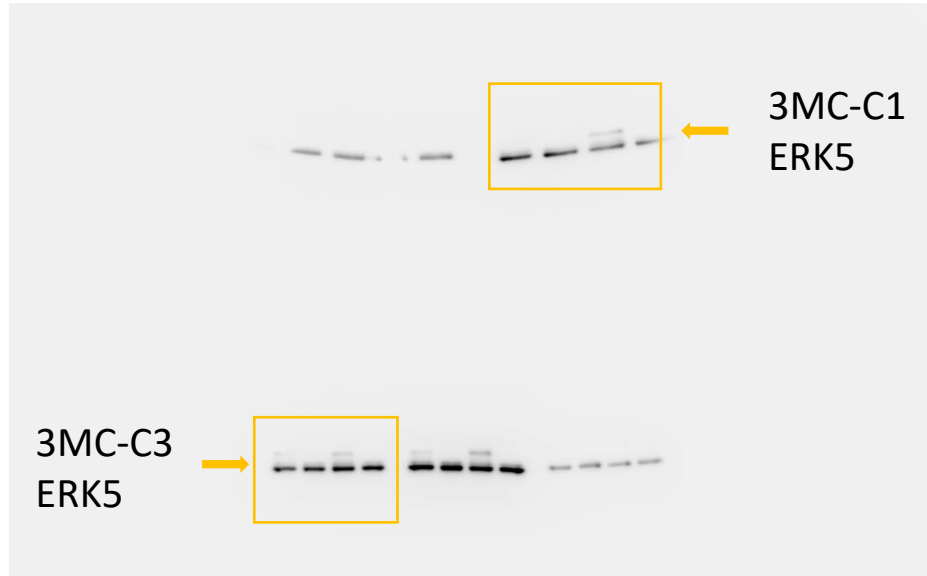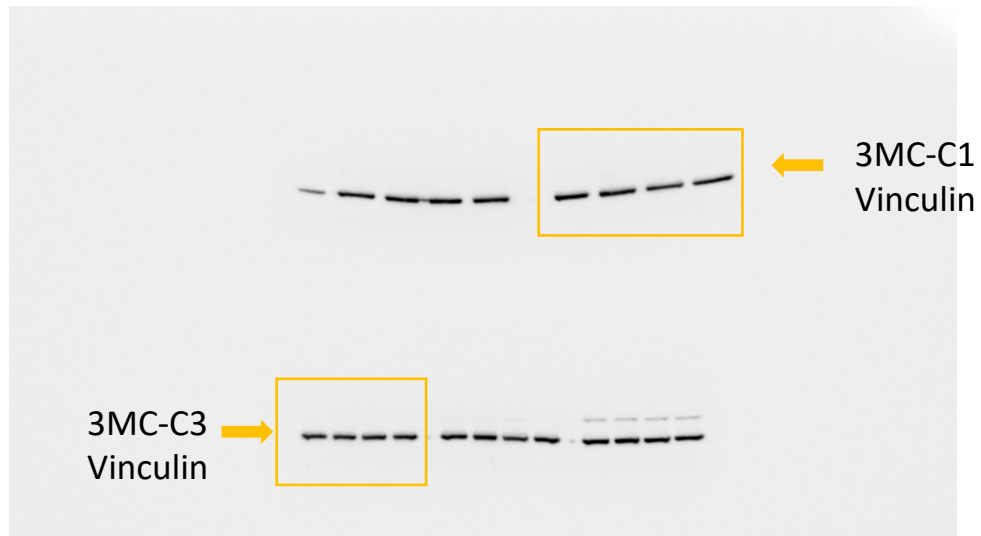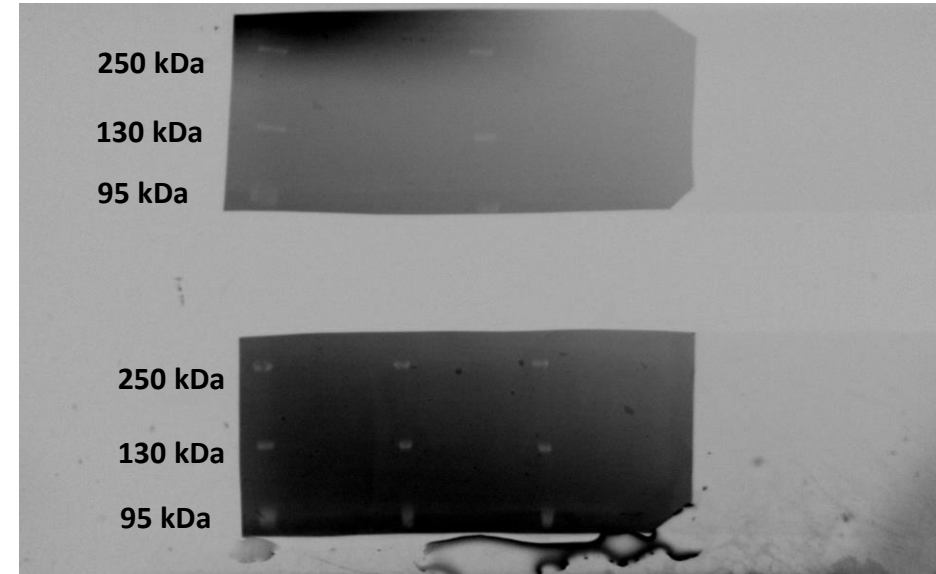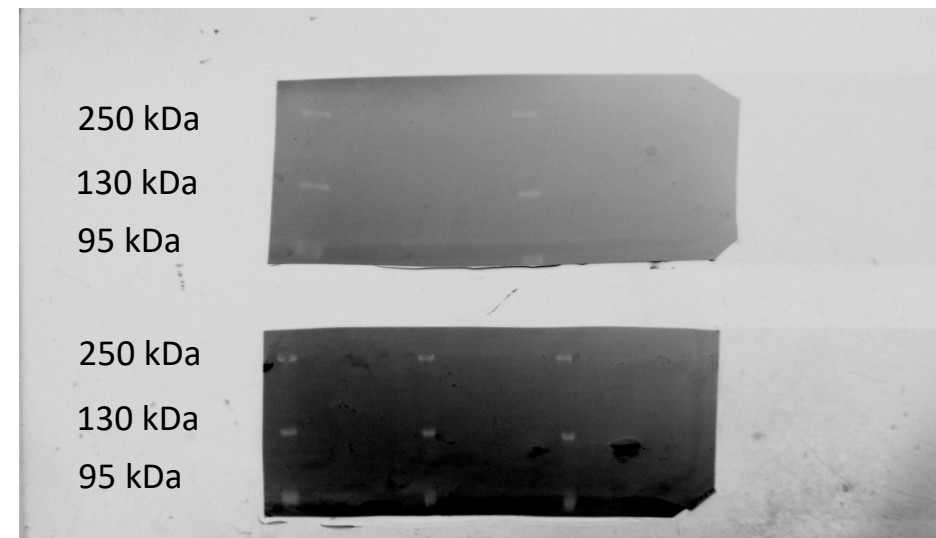

# Supplementary Figure 3

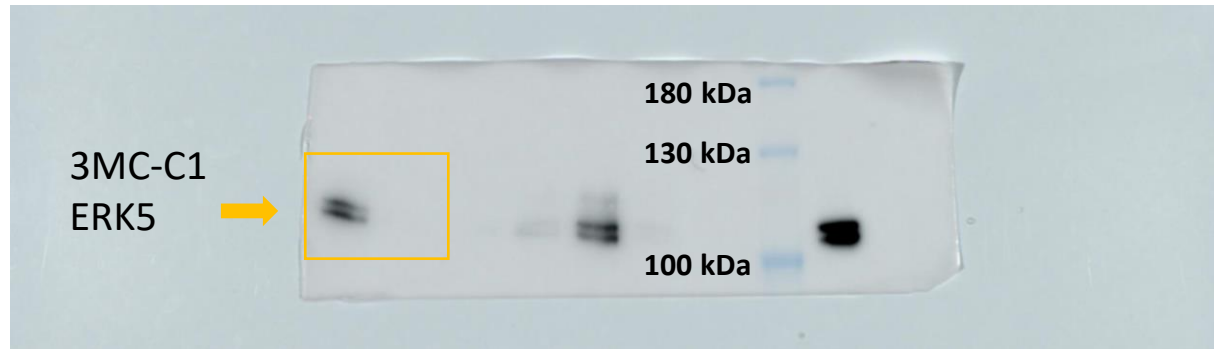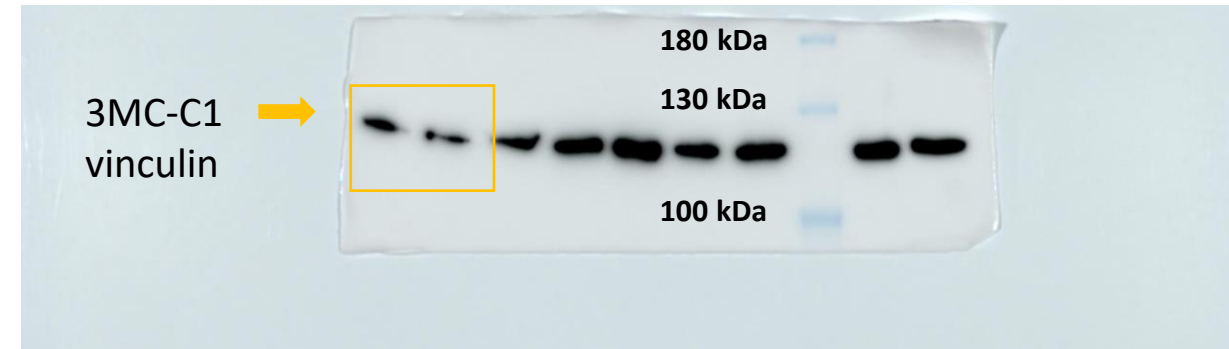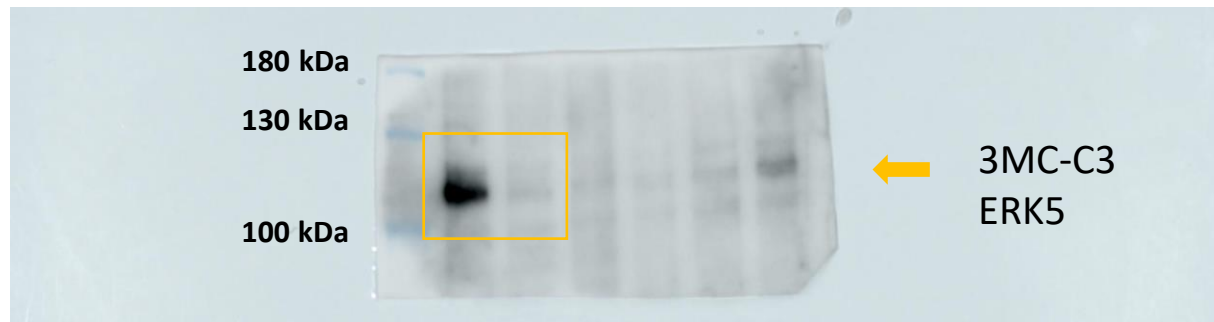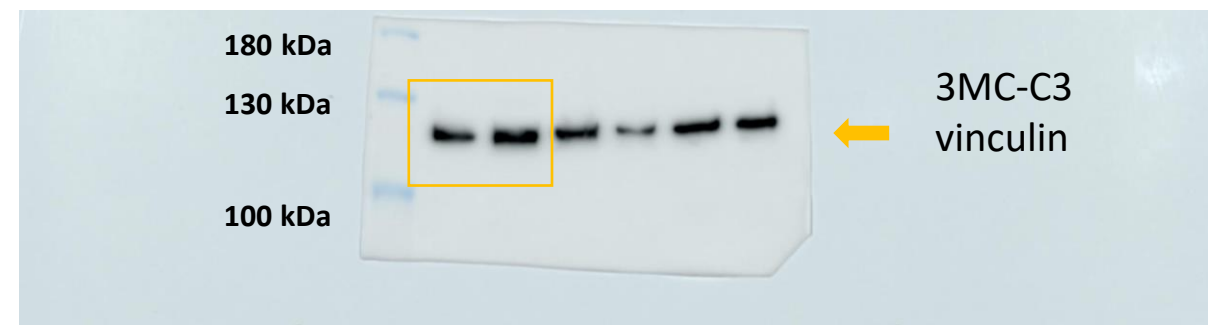

# Supplementary Figure 6

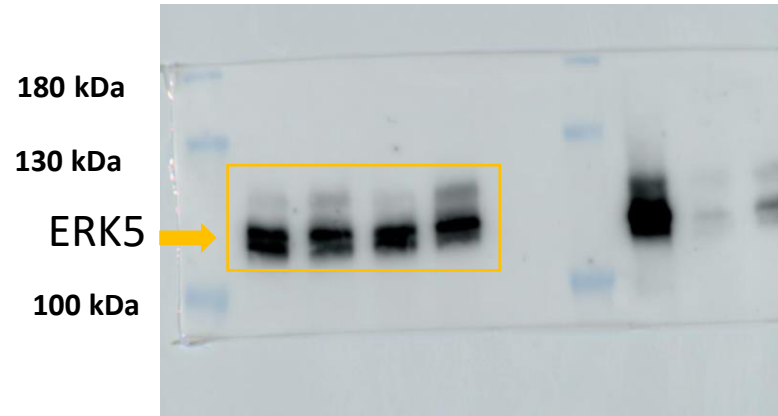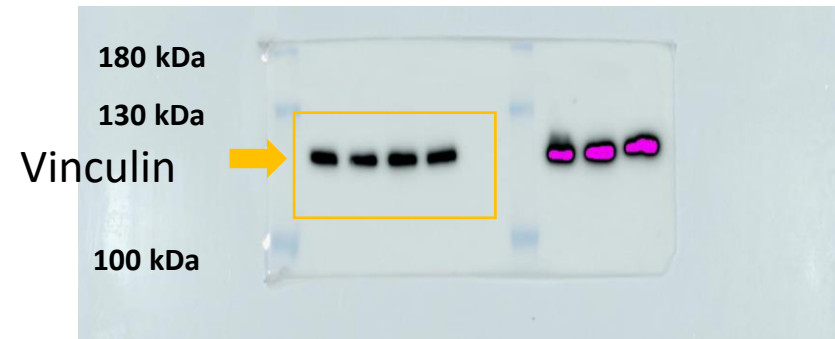

Supplement: Supplementary file 1 [file cancers-14-03509-s001.zip › Supplementary Figure S7. original blots .pdf]
