# Supplementary material for: ERK5 Is a Major Determinant of Chemical Sarcomagenesis: Implications in Human Pathology
Source: Cancers (Basel). 2022 Jul 19;14(14):3509. doi: 10.3390/cancers14143509 (PMC9316148; doi:10.3390/cancers14143509)
Supplement: Supplementary file 1 [file cancers-14-03509-s001.zip › cancers-1802968-supplementary.pdf]

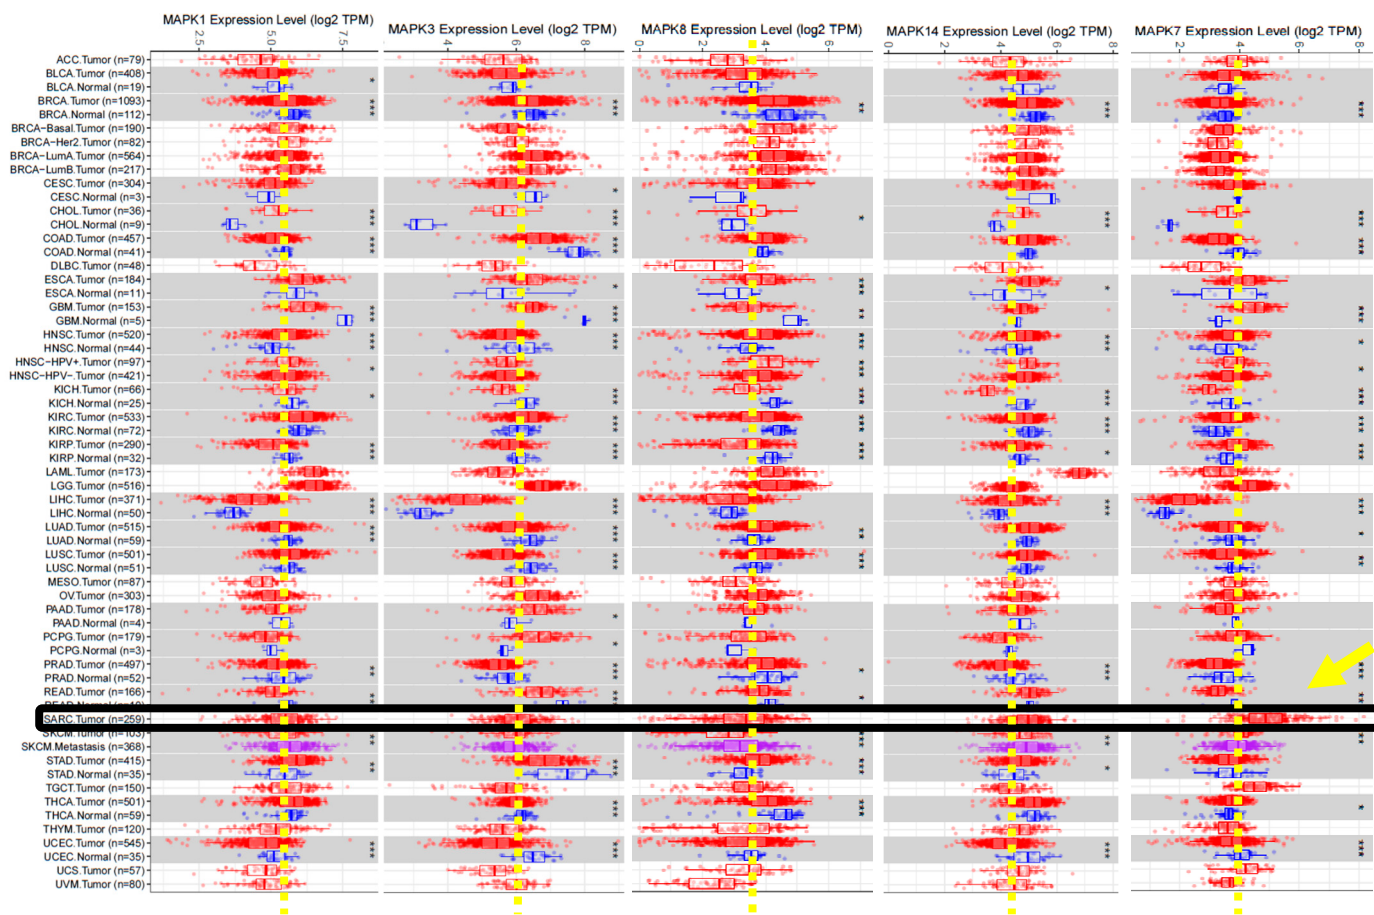

**Supplementary Figure S1. *In silico* analysis of RNA expression patterns of MAPK1 (ERK2), MAPK3 (ERK1), MAPK8 (JNK1), MAPK14 (p38α) and MAPK7 (ERK5) in the TCGA series. The sarcoma series (SARC Tumor) is framed with a black rectangle. Level of mRNA MAPK7 is indicated with a yellow arrow.**

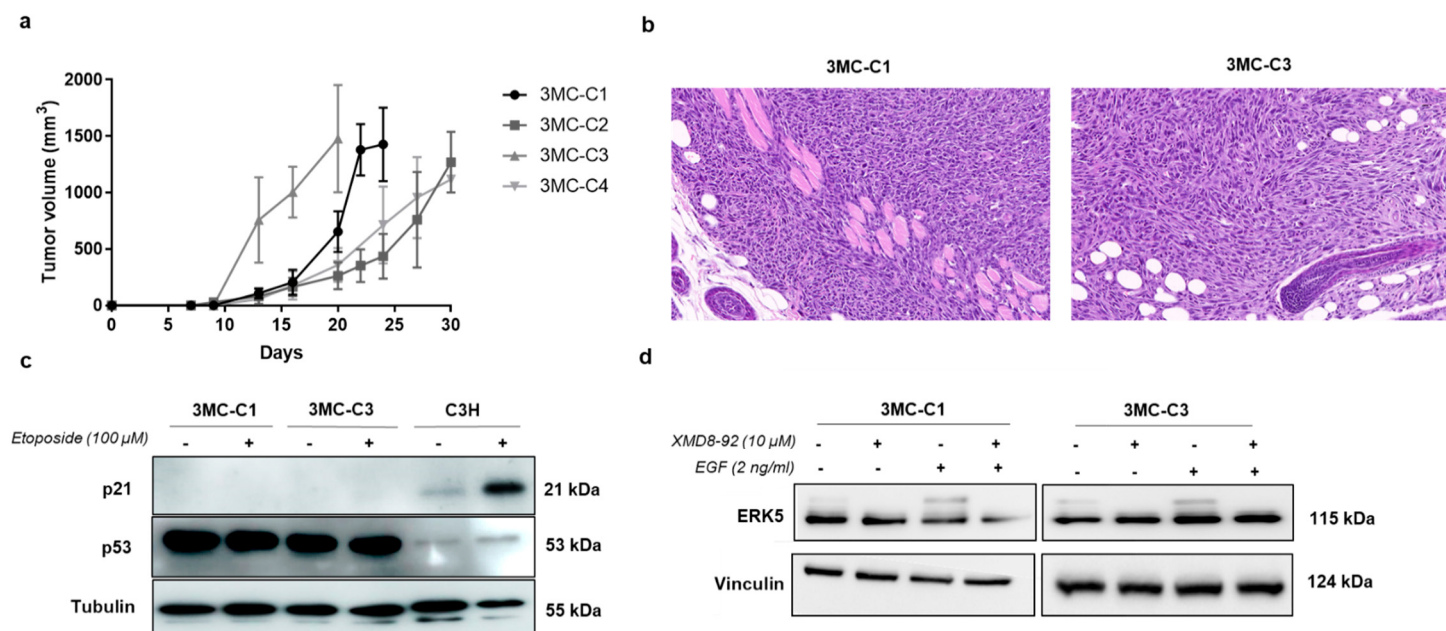

**Supplementary Figure S2. Characterization of cell lines from 3MC-induced tumors.** **a)** Nude mice (n=4) were inoculated with  $5 \times 10^5$  cells and tumor growth of parental 3MC-C1, 3MC-C2, 3MC-C3 and 3MC-C4 cell lines was monitored. **b)** Representative histological images of fixed sections of tumors obtained from 3MC-C1 and 3MC-C3 cell lines. Pictures are depicted at a 20x magnification. **c)** 3MC-C1, 3MC-C3 and CH310t1/2 (C3H) cells were treated with etoposide for 4 h. Fifty  $\mu$ g of protein extracts were blotted against the indicated antibodies. Tubulin was used as a loading control. **d)** 3MC-C1 and 3MC-C3 cells were incubated with XMD8-92 overnight and then treated with EGF for 15 min. Activation of ERK5 was detected by western blotting and vinculin was used as loading control. Pictures are a representative image out of 3 independent experiments. Original blots could be found in Figure S7.

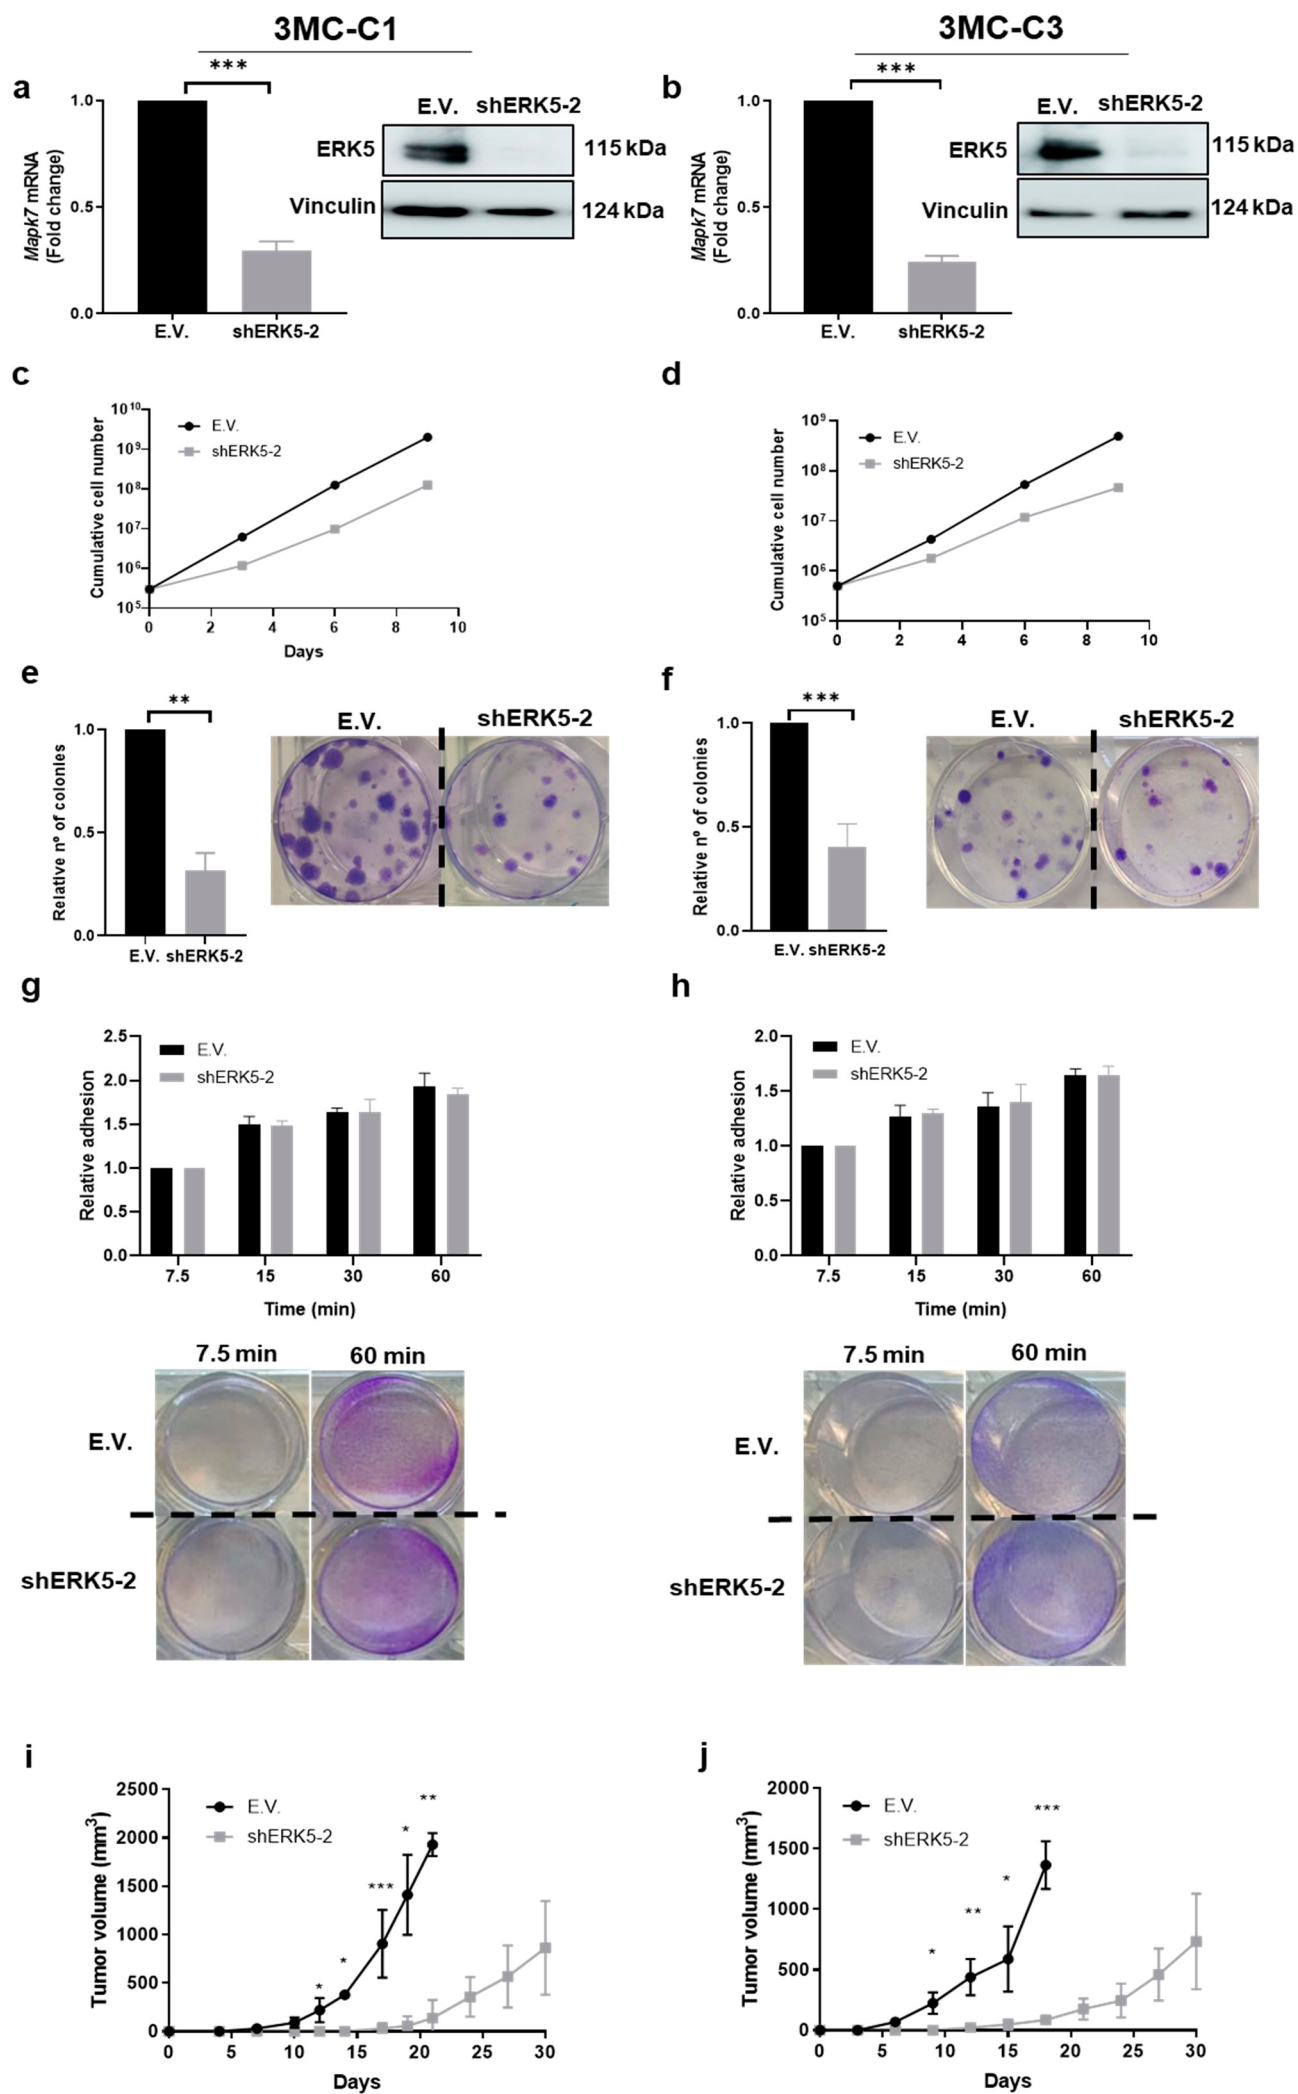

**Supplementary Figure S3. A second shRNA for ERK5 (TRC-N-0000232397) showed identical behavior in 3MC-C1 and 3MC-C3 cell lines.** 3MC-C1 **(a)** and 3MC-C3 **(b)** cells were infected with lentiviruses carrying PLKO.1 (E.V.) or a second shRNA for ERK5 (shERK5-2). Interference was evaluated by RT-qPCR using  $\beta$ -2-microglobulin (B2M) as an endogenous control (left panel). E.V. cells were refereed as 1. Histogram shows the average of 3 independent pools of infection. Right panel shows a representative image of the interference by western blot using vinculin as a loading control. For growth curves,  $3 \times 10^5$  E.V. or shERK5-2 3MC-C1 cells **(c)** and  $5 \times 10^5$  E.V. or shERK5-2 3MC-C3 cells **(d)** were seeded in 100 mm plates. Every 3 days, cells were counted and replated in the same manner up to day 9. Graphic shows the cumulative cells number from a representative experiment out of 3 with nearly identical results, performed with different pools of infections. Relative number of colonies obtained in clonogenic assays of 3MC-C1 **(e)** and 3MC-C3 **(f)** E.V. and shERK5-2 cells (left panel). Representative image of a colony formation assay (right panel) for 3MC-C1 and 3MC-C3. Relative adhesion of 3MC-C1 **(g)** and 3MC-C3 **(h)** E.V. or shERK5-2 cells was assessed by crystal violet staining at different time points (upper panel). Representative image of adhesion assays at 7.5 and 60 min (lower panel). 3MC-C1 **(i)** and 3MC-C3 **(j)** cell lines were infected with E.V. or shERK5-2 and nude mice (n=4) were inoculated with  $5 \times 10^5$  cells of each cell line and tumorigenesis was evaluated at the indicated times. Graphics represent the mean  $\pm$  SD. The experiment was performed twice with similar results. Results represent the mean  $\pm$  SD of 3 independent experiments performed in triplicate cultures with different pools of infection, if not otherwise indicated. Original blots could be found in Figure S7.

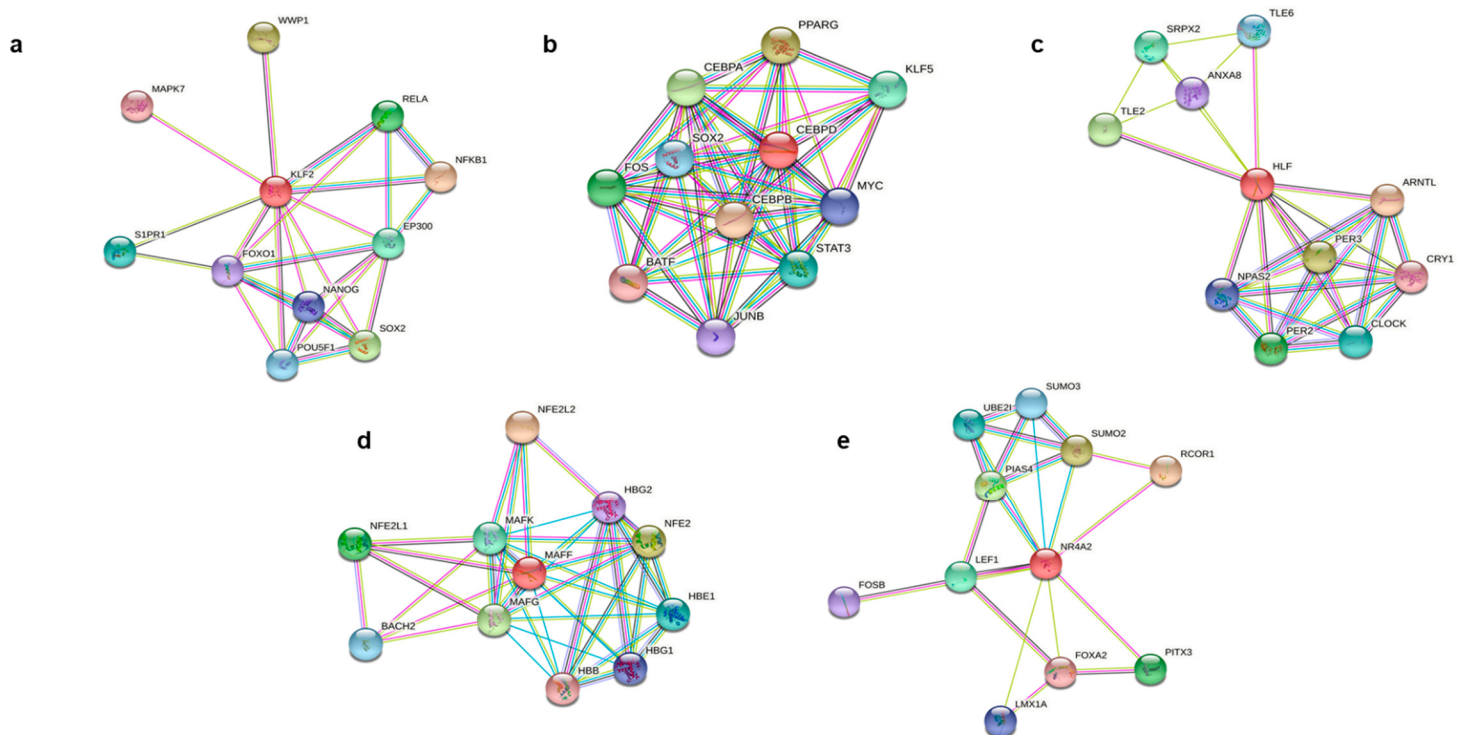

**Supplementary Figure S4. Protein-protein interaction network.** A Protein-protein interaction network based on the STRING web site was performed for all the transcription factors differentially regulated by ERK5: KLF2 **(a)**, CEBPB **(b)**, HLF **(c)**, MAFF **(d)**, and NR4A2 **(e)**. For each transcription factor a protein-protein interaction network query was performed. KLF2 was the unique transcription factor able to interact with ERK5.

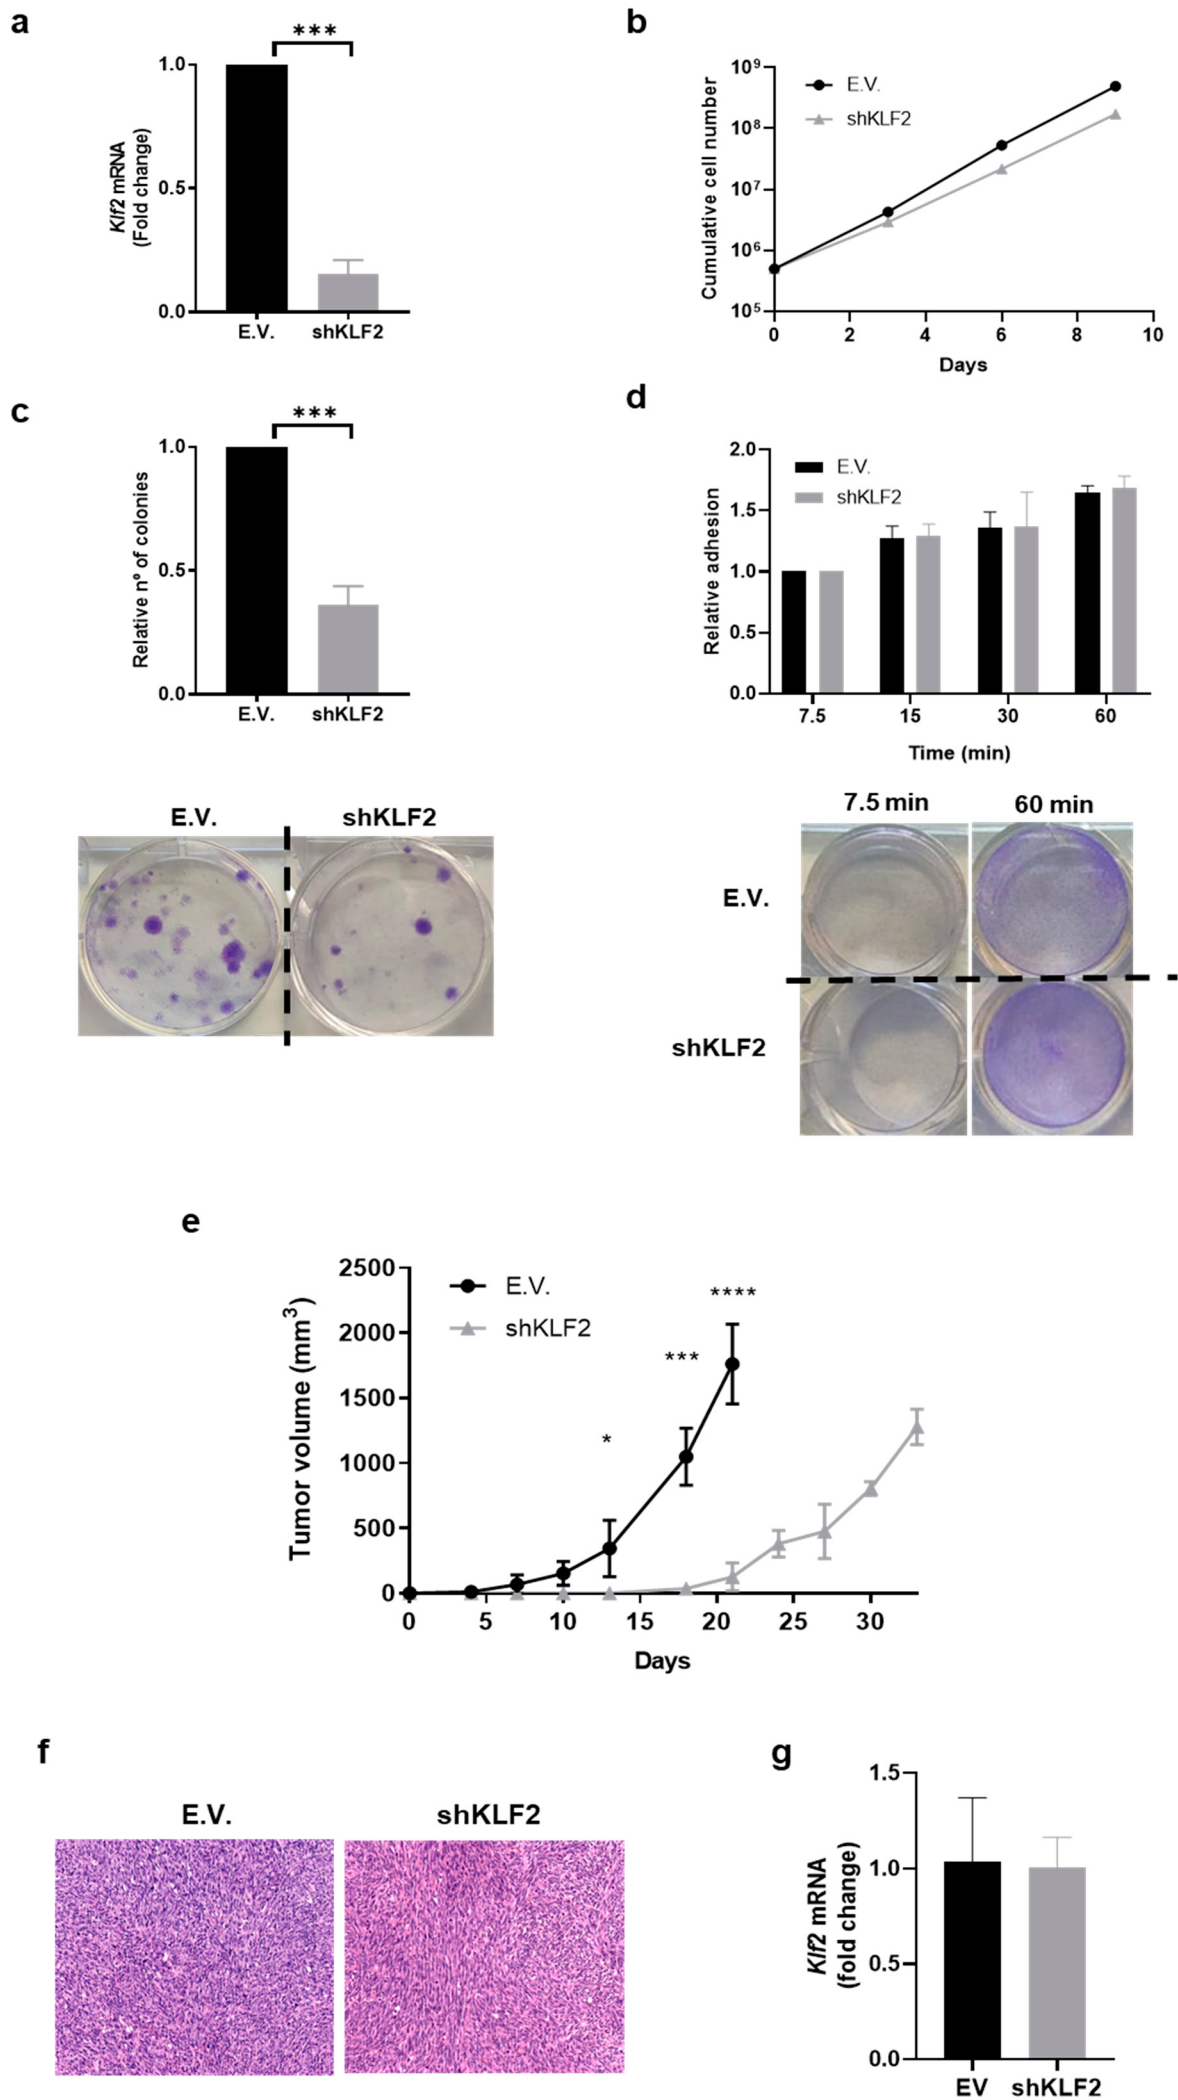

**Supplementary Figure S5. Abrogation of KLF2 expression in 3MC-3C cell line.** 3MC-C3 cells were infected with lentiviruses carrying empty vector (E.V.) or a shRNA for KLF2 (shKLF2). **a)** Interference was evaluated by RT-qPCR showing effective knockdown of *Klf2*.  $\beta$ -2-microglobulin (B2M) was used as an endogenous control. *Klf2* levels in E.V. cells were refereed as 1. **b)** For growth curves,  $5 \times 10^5$  E.V. or shKLF2 3MC-C3 cells were seeded in 100 mm plates. Every 3 days, cells were counted and replated in the same manner up to day 9. Graphic shows the cumulative cells number from a representative experiment out of 3 with nearly identical results, from 3 different pools of infections. **c)** Upper panel: Relative number of colonies obtained in clonogenic assays of E.V. or shKLF2 3MC-C3 cells. Colonies formed by E.V. cells were considered as 1. Lower panel: Representative image of a colony formation assay. **d)** Upper panel: Relative adhesion of E.V. or shKLF2 3MC-C3 cells was assessed by crystal violet staining at different time points. Lower panel: Representative image of adhesion assays at 7.5 and 60 min. **e)** Nude mice (n=4) were inoculated with  $5 \times 10^5$  E.V. and shKLF2 3MC-C3 cells and tumor growth was analysed at the indicated times. **f)** Representative images of the histological study of tumors obtained from E.V. and shKLF2 3MC-C3 cells. Pictures are depicted at a 20x magnification. **g)** RNA from tumors induced by E.V. and shKLF2 3MC-C3 cells was extracted and *Klf2* levels measured by RT-qPCR. *Mapk1* was used as an endogenous control. Histogram/graphs represent the mean  $\pm$  SD of 3 independent experiments performed in triplicate cultures with 3 different pools of infection, if not otherwise indicated.

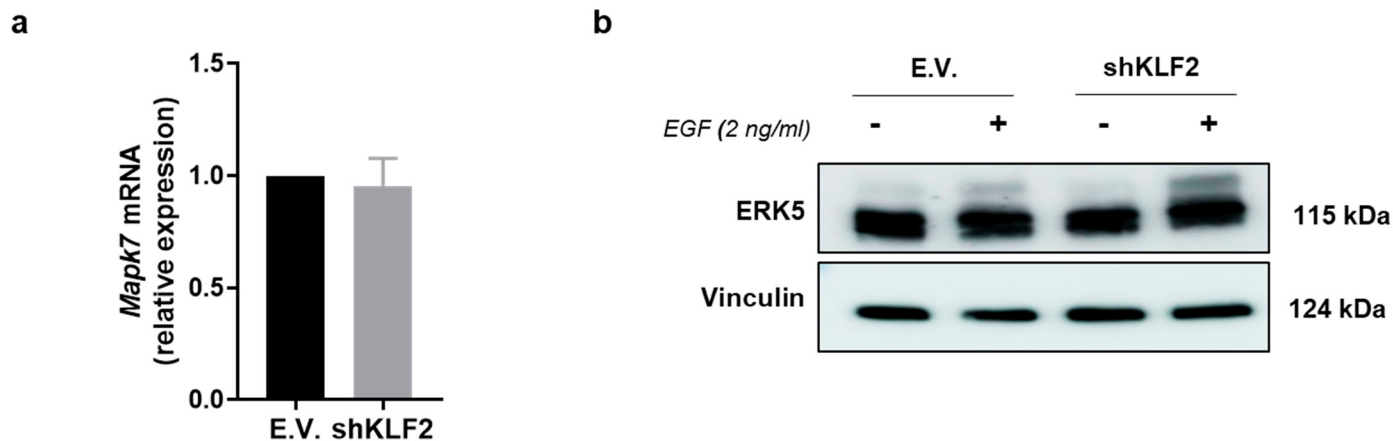

**Supplementary Figure S6. Lack of KLF2 does not affect ERK5 expression or functionality. a)** Levels of ERK5 were assessed by RT-qPCR in E.V. and shKLF2 3MC-C1 cells. Histogram shows the average of 3 independent pools of infection. **b)** Subconfluent E.V. and shKLF2 3MC-C1 cells were exposed to EGF at the indicated concentration for 15 min. Then, cell lysates were collected and blotted against ERK5. Vinculin was used as a loading control. Image shows a representative experiment out of 3 performed with at least 2 different pools of infections. Original blots could be found in Figure S7.

**Supplementary Table S1. List of antibodies used in this work.**

| <b>Antibody</b>         | <b>Dilution</b> | <b>Manufacturer</b>       | <b>Reference</b> | <b>Use</b>           |
|-------------------------|-----------------|---------------------------|------------------|----------------------|
| ERK5                    | 1:1000          | Cell Signaling Technology | 3372S            | Western blot         |
| Vinculin                | 1:2000          | Sigma-Aldrich             | V9264            | Western blot         |
| Tubulin                 | 1:500           | Santa Cruz Biotechnology  | DM1A             | Western blot         |
| p21                     | 1:500           | Santa Cruz Biotechnology  | sc6246           | Western blot         |
| p53                     | 1:200           | Leica                     | P53-CM5P-L       | Western blot         |
| Anti-mouse              | 1:5000          | Cell Signaling Technology | 7076S            | Western blot         |
| Anti-rabbit             | 1:5000          | Cell Signaling Technology | 7074S            | Western blot         |
| Vimentin                | 1:750           | Abcam                     | 92547            | Immunohistochemistry |
| Smooth muscle<br>actine | 1:150           | Abcam                     | 121964           | Immunohistochemistry |
| Caldesmon               | 1:100           | Roche                     | 760-4375         | Immunohistochemistry |
| Demin                   | 1:250           | Abcam                     | 32362            | Immunohistochemistry |
| Protein S100            | 1:100           | Dako                      | IR504            | Immunohistochemistry |
| CD34                    | 1:100           | Abcam                     | 81289            | Immunohistochemistry |
| ERK5                    | 1:200           | Abcam                     | 196609           | Immunohistochemistry |

**Supplementary Table S2. List of RT-qPCR primers used in this report.**

| Primer             | Forward                   | Reverse               |
|--------------------|---------------------------|-----------------------|
| mouse <i>Mapk7</i> | AGATCTGTCTATGTGGTACTG     | CTGGTACAGGAAGTATCTCAC |
| mouse <i>Mapk1</i> | CCGCACAAAAATAAGGTGCCA     | GGCCAGAGCCTGTTCAACTT  |
| mouse <i>B2m</i>   | GGTCTTTCTGGTGCTTGTCTCA    | GTTCGGCTTCCCATTCTCC   |
| mouse <i>Npnt</i>  | GCTGACGTCAAAGCGTCAT       | GCAGCGACCTCTTTTCAAGC  |
| mouse <i>Rgs2</i>  | AAGGAAGCTCCCAAAGAGATAAACA | TTCTGAGCTGTGGTGAAGCA  |
| mouse <i>Cdk18</i> | CCATGGACATCCGCCTACC       | TTTCCAGTTTCCCAAAGCCG  |
| mouse <i>Klf2</i>  | AAGAGCTCGCACCTAAAGGC      | CTTTCGGTAGTGGCGGGTAA  |
| mouse <i>Vcan</i>  | AGGCGTCTACCGATGTGATG      | CAGCGGCAAAGTTCAGAGTG  |
| mouse <i>Thbs1</i> | TGACAACTGCCCCTACAACC      | TCCATCGATGTCCACAGCAC  |
| mouse <i>Cbx6</i>  | CCACCCATCTCGCCCTTTTC      | GGACCCTTGTCATCACCTTCA |
| mouse <i>Maff</i>  | GGAAGCTGTCAGGCAAAACG      | ACTGTTCCCCCTGTGAAAGC  |
| mouse <i>Cebpd</i> | AGAACCCGCGGCCTTCTAC       | AATGTAGGCGCTGAAGTCGAT |
| mouse <i>Gas1</i>  | CAACATGTTTCGGCCCTCTTC     | TGAGTCTAGGCCTCCTTTGC  |
| human <i>MAPK7</i> | AGCACTTTAAACACGACAAC      | TAGACAGATTTGAATTCGCC  |
| human <i>GAPDH</i> | TCGTGGAAGGACTCATGACCA     | CAGTCTTCTGGGTGGCAGTGA |

**Supplementary Table S3. Data of Patients Studied.**

| <b>ID</b>         | <b>Age</b> | <b>Sex</b> | <b>Diagnosis</b>              | <b>Location</b> |
|-------------------|------------|------------|-------------------------------|-----------------|
| <b>Patient 01</b> | 61         | F          | Leiomyosarcoma                | Uterus          |
| <b>Patient 02</b> | 60         | F          | Leiomyosarcoma                | Uterus          |
| <b>Patient 03</b> | 42         | F          | Leiomyosarcoma                | Uterus          |
| <b>Patient 04</b> | 32         | F          | Leiomyosarcoma                | Uterus          |
| <b>Patient 05</b> | 50         | F          | Leiomyosarcoma                | Uterus          |
| <b>Patient 06</b> | 44         | F          | Leiomyosarcoma                | Uterus          |
| <b>Patient 07</b> | 60         | F          | Leiomyosarcoma                | Uterus          |
| <b>Patient 08</b> | 54         | F          | Leiomyosarcoma                | Uterus          |
| <b>Patient 09</b> | 43         | F          | Leiomyosarcoma                | Uterus          |
| <b>Patient 10</b> | 44         | F          | Leiomyosarcoma                | Uterus          |
| <b>Patient 11</b> | 62         | F          | Fusocellular rhabdomyosarcoma | Maxillary       |
| <b>Patient 12</b> | 47         | M          | Fusocellular rhabdomyosarcoma | Leg             |
| <b>Patient 13</b> | 48         | F          | Pleomorphic rhabdomyosarcoma  | Leg             |
| <b>Patient 14</b> | 51         | M          | Alveolar rhabdomyosarcoma     | Head-neck       |
| <b>Patient 15</b> | 54         | F          | Alveolar rhabdomyosarcoma     | Forearm         |
| <b>Patient 16</b> | 54         | M          | Pleomorphic rhabdomyosarcoma  | Inguinal Node   |
| <b>Patient 17</b> | 36         | F          | Alveolar rhabdomyosarcoma     | Parotid gland   |
| <b>Patient 18</b> | 72         | M          | Alveolar rhabdomyosarcoma     | Urethra         |
