# Supplementary material for: ERK5 Is a Major Determinant of Chemical Sarcomagenesis: Implications in Human Pathology
Source: Cancers (Basel). 2022 Jul 19;14(14):3509. doi: 10.3390/cancers14143509 (PMC9316148; doi:10.3390/cancers14143509)
Supplement: Supplementary file 1 [file cancers-14-03509-s001.zip › Supplementary Table 4 Excel files with differential expressed genes in the RNAseq analysis.xls]

## Sheet: Sheet1
	baseMean	log2FoldChange	lfcSE	stat	pvalue	padj	symbol
ENSMUSG00000000001	2602.78	0.103884	0.0704439	1.47471	0.14029	0.463054	Gnai3
ENSMUSG00000000028	526.159	-0.0628976	0.080844	-0.778012	0.436562	0.759301	Cdc45
ENSMUSG00000000037	9.51873	0.137971	0.64831	0.212817	0.83147		Scml2
ENSMUSG00000000056	190.532	0.197272	0.228506	0.863311	0.387966	0.720466	Narf
ENSMUSG00000000058	721.563	-0.0489695	0.107315	-0.456317	0.648162	0.870689	Cav2
ENSMUSG00000000078	1788.67	0.225209	0.125462	1.79504	0.0726481	0.33184	Klf6
ENSMUSG00000000085	523.665	0.181709	0.146808	1.23773	0.215815	0.565225	Scmh1
ENSMUSG00000000088	1117.01	0.062688	0.0941071	0.666135	0.505325	0.798373	Cox5a
ENSMUSG00000000126	6.57297	0.123288	0.779556	0.158151	0.874338		Wnt9a
ENSMUSG00000000127	240.22	0.360632	0.200214	1.80123	0.0716661	0.329549	Fer
ENSMUSG00000000131	1167.3	0.00396053	0.131476	0.0301236	0.975968	0.991009	Xpo6
ENSMUSG00000000134	876.544	-0.0317814	0.111167	-0.285889	0.774963	0.919953	Tfe3
ENSMUSG00000000142	6.46345	0.321952	0.851426	0.378133	0.705332		Axin2
ENSMUSG00000000148	203.372	-0.104635	0.128325	-0.81539	0.414849	0.743872	Brat1
ENSMUSG00000000149	1193.46	-0.132197	0.0830745	-1.59131	0.11154	0.417	Gna12
ENSMUSG00000000159	30.9991	0.14812	0.509231	0.290871	0.77115		Igsf5
ENSMUSG00000000167	13.2322	0.0737583	0.430613	0.171287	0.863998		Pih1d2
ENSMUSG00000000168	1415.29	0.282145	0.0704654	4.00401	6.22765e-05	0.00413946	Dlat
ENSMUSG00000000171	902.222	-0.180289	0.0811891	-2.2206	0.026378	0.1962	Sdhd
ENSMUSG00000000184	2832.85	0.32641	0.116323	2.80606	0.00501517	0.0729053	Ccnd2
ENSMUSG00000000194	513.278	0.197445	0.203737	0.96912	0.332485	0.677204	Gpr107
ENSMUSG00000000223	11.7452	0.900055	0.499777	1.80091	0.0717165		Drp2
ENSMUSG00000000247	18.5851	-1.18956	0.620874	-1.91594	0.0553724		Lhx2
ENSMUSG00000000253	65.6056	0.101512	0.322239	0.315021	0.752745	0.913493	Gmpr
ENSMUSG00000000266	77.4623	0.149158	0.228642	0.652364	0.514166	0.802906	Mid2
ENSMUSG00000000275	658.501	-0.0143237	0.112694	-0.127102	0.898859	0.964372	Trim25
ENSMUSG00000000276	249.433	0.316633	0.152421	2.07736	0.037768	0.238381	Dgke
ENSMUSG00000000278	2035.92	0.18192	0.0637212	2.85494	0.00430448	0.065515	Scpep1
ENSMUSG00000000282	423.721	-0.195582	0.153082	-1.27764	0.201378	0.546309	Mnt
ENSMUSG00000000290	28.7393	-0.936286	0.323875	-2.89089	0.00384157		Itgb2
ENSMUSG00000000295	145.467	-0.0921883	0.147612	-0.624533	0.532278	0.814688	Hddc2
ENSMUSG00000000296	30.8534	0.0652866	0.372405	0.175311	0.860836		Tpd52l1
ENSMUSG00000000301	43.3238	-0.128824	0.33059	-0.389679	0.696774		Pemt
ENSMUSG00000000317	397.492	-0.415188	0.157588	-2.63464	0.00842272	0.100096	Bcl6b
ENSMUSG00000000325	33.0248	-0.325026	0.333557	-0.974425	0.329846		Arvcf
ENSMUSG00000000326	680.419	-0.422741	0.0953076	-4.43554	9.18406e-06	0.000912536	Comt
ENSMUSG00000000339	716.679	0.115088	0.109521	1.05083	0.293337	0.642542	Rtca
ENSMUSG00000000340	201.891	0.238732	0.13993	1.70608	0.0879928	0.368248	Dbt
ENSMUSG00000000346	1268.76	-0.123861	0.0923624	-1.34104	0.179909	0.518994	Dazap2
ENSMUSG00000000355	148.86	-0.0983251	0.136997	-0.717717	0.472932	0.781232	Mcts1
ENSMUSG00000000374	585.018	0.0630743	0.0897138	0.703061	0.482018	0.785708	Trappc10
ENSMUSG00000000378	615.482	-0.0737465	0.1106	-0.666787	0.504908	0.798365	Ccm2
ENSMUSG00000000384	1046.04	0.0981549	0.119113	0.824049	0.409912	0.73931	Tbrg4
ENSMUSG00000000392	7.29617	0.00851579	0.74793	0.0113858	0.990916		Fap
ENSMUSG00000000399	505.368	0.0730826	0.108107	0.676022	0.499027	0.795768	Ndufa9
ENSMUSG00000000420	1554.64	0.191483	0.139481	1.37282	0.169807	0.50652	Galnt1
ENSMUSG00000000439	238.13	0.0180342	0.1137	0.158612	0.873975	0.957791	Mkrn2
ENSMUSG00000000440	11.7922	1.41992	0.69647	2.03873	0.0414768		Pparg
ENSMUSG00000000441	1011.44	-0.163289	0.0762136	-2.14252	0.0321519	0.218996	Raf1
ENSMUSG00000000486	21.9066	-0.230709	0.375622	-0.614206	0.539079		Sept1
ENSMUSG00000000530	11.3396	0.806013	0.680685	1.18412	0.236365		Acvrl1
ENSMUSG00000000531	400.845	-0.00858309	0.10389	-0.0826167	0.934156	0.977355	Grasp
ENSMUSG00000000532	254.105	0.0281867	0.170879	0.164951	0.868982	0.956625	Acvr1b
ENSMUSG00000000538	464.703	0.204957	0.159029	1.2888	0.197467	0.540219	Tom1l2
ENSMUSG00000000552	110.46	-0.176429	0.33916	-0.520194	0.602929	0.848697	Zfp385a
ENSMUSG00000000555	3823.84	0.267694	0.113317	2.36235	0.0181595	0.159546	Itga5
ENSMUSG00000000561	1857.38	0.248782	0.10435	2.38411	0.0171204	0.153209	Wdr77
ENSMUSG00000000563	2016.3	0.0275914	0.0790972	0.34883	0.727217	0.902979	Atp5f1
ENSMUSG00000000567	1147.75	-0.101447	0.129302	-0.784574	0.432703	0.756328	Sox9
ENSMUSG00000000568	4055.94	-0.1335	0.0788451	-1.6932	0.0904183	0.37417	Hnrnpd
ENSMUSG00000000579	7.31428	0.127191	0.762387	0.166833	0.867502		Dynlt1c
ENSMUSG00000000581	251.313	0.0431923	0.178541	0.241918	0.808844	0.932046	C1d
ENSMUSG00000000594	96.78	0.433006	0.204595	2.1164	0.0343105	0.226496	Gm2a
ENSMUSG00000000600	277.951	0.00326914	0.110254	0.029651	0.976345	0.991009	Krit1
ENSMUSG00000000605	336.783	0.023743	0.109277	0.217274	0.827995	0.939803	Clcn4
ENSMUSG00000000628	897.084	0.160832	0.173095	0.929158	0.352807	0.695014	Hk2
ENSMUSG00000000631	384.427	-0.572855	0.284545	-2.01323	0.0440905	0.257698	Myo18a
ENSMUSG00000000686	7.41814	0.0882145	0.686813	0.12844	0.8978		Abhd15
ENSMUSG00000000690	25.9452	0.0311507	0.445406	0.0699378	0.944243		Hoxb6
ENSMUSG00000000693	696.531	0.20678	0.119993	1.72327	0.084839	0.360369	Loxl3
ENSMUSG00000000706	16.6299	1.17864	0.639942	1.84179	0.0655052		Btn1a1
ENSMUSG00000000708	296.823	-0.163598	0.206908	-0.79068	0.429131	0.753316	Kat2b
ENSMUSG00000000711	670.936	-0.225405	0.0724579	-3.11084	0.00186555	0.0403817	Rab5b
ENSMUSG00000000730	61.9292	-0.166735	0.282133	-0.590981	0.554533	0.826312	Dnmt3l
ENSMUSG00000000732	23.9744	-0.68583	0.68297	-1.00419	0.315288		Icosl
ENSMUSG00000000738	762.626	-0.184601	0.10543	-1.75093	0.0799574	0.348701	Spg7
ENSMUSG00000000740	10540.5	-0.0615178	0.104377	-0.589383	0.555604	0.827097	Rpl13
ENSMUSG00000000743	937.94	-0.0621027	0.070955	-0.87524	0.381443	0.714978	Chmp1a
ENSMUSG00000000751	2178.98	0.0962473	0.0675479	1.42488	0.154193	0.481254	Rpa1
ENSMUSG00000000753	738.195	0.0265885	0.456604	0.0582309	0.953565	0.983496	Serpinf1
ENSMUSG00000000759	758.84	-0.154496	0.0830255	-1.86083	0.0627687	0.307714	Tubgcp3
ENSMUSG00000000776	476.85	0.0220064	0.136228	0.161541	0.871667	0.957285	Polr3d
ENSMUSG00000000782	87.3481	0.72181	0.262214	2.75276	0.00590957	0.080603	Tcf7
ENSMUSG00000000787	7016.9	0.172619	0.088595	1.9484	0.0513667	0.276188	Ddx3x
ENSMUSG00000000791	11.1106	0.870757	1.05255	0.827286	0.408075		Il12rb1
ENSMUSG00000000792	7.39273	-0.0671065	0.63021	-0.106483	0.915199		Slc5a5
ENSMUSG00000000804	546.653	0.033261	0.100126	0.332191	0.739745	0.908015	Usp32
ENSMUSG00000000811	233.393	0.237818	0.197975	1.20125	0.229654	0.580373	Txnrd3
ENSMUSG00000000823	529.798	-0.130812	0.151883	-0.861267	0.389091	0.721443	Zfp512b
ENSMUSG00000000826	1139.18	0.168531	0.140169	1.20234	0.229233	0.580022	Dnajc5
ENSMUSG00000000827	573.002	-0.301341	0.114854	-2.62368	0.00869848	0.10199	Tpd52l2
ENSMUSG00000000838	1322.1	0.255378	0.0680136	3.75481	0.000173475	0.00792394	Fmr1
ENSMUSG00000000861	8.62952	-1.08946	0.887454	-1.22763	0.219588		Bcl11a
ENSMUSG00000000876	51.8052	-0.625734	0.250895	-2.494	0.0126312		Pxmp4
ENSMUSG00000000881	482.335	0.0985818	0.151	0.652861	0.513846	0.802751	Dlg3
ENSMUSG00000000884	23.1101	-2.20004	0.578366	-3.80389	0.000142443		Gnb1l
ENSMUSG00000000901	178.644	-0.177435	0.278655	-0.636754	0.524285	0.809886	Mmp11
ENSMUSG00000000902	912.673	-0.0531701	0.0745047	-0.713648	0.475445	0.782238	Smarcb1
ENSMUSG00000000915	273.457	0.250962	0.37323	0.672406	0.501325	0.796665	Hip1r
ENSMUSG00000000916	245.924	-0.127991	0.117757	-1.0869	0.27708	0.629685	Nsun5
ENSMUSG00000000934	267.902	0.00666085	0.11257	0.0591707	0.952816	0.983427	Top1mt
ENSMUSG00000000938	287.53	0.0978661	0.118579	0.825325	0.409187	0.738845	Hoxa10
ENSMUSG00000000942	24.8639	-0.112948	0.311288	-0.36284	0.716724		Hoxa4
ENSMUSG00000000948	6.23182	0.0445221	0.741586	0.0600363	0.952127
ENSMUSG00000000957	3232.56	0.142949	0.0732079	1.95265	0.0508616	0.275551	Mmp14
ENSMUSG00000000959	352.039	-0.0591887	0.102651	-0.576603	0.564208	0.831092	Oxa1l
ENSMUSG00000000976	370.155	0.135239	0.174386	0.775519	0.438033	0.759759	Heatr6
ENSMUSG00000001016	802.087	0.115316	0.133048	0.866724	0.386093	0.718372	Ilf2
ENSMUSG00000001017	1626	-0.127077	0.0610657	-2.08099	0.0374346	0.237609	Chtop
ENSMUSG00000001018	335.582	-0.106118	0.103541	-1.02488	0.305419	0.651822	Snapin
ENSMUSG00000001020	2279.72	-0.388454	0.130353	-2.98002	0.00288225	0.0523533	S100a4
ENSMUSG00000001021	27.4836	-0.0323114	0.413168	-0.078204	0.937666		S100a3
ENSMUSG00000001025	2263.57	-0.451581	0.127689	-3.53657	0.000405356	0.0144163	S100a6
ENSMUSG00000001034	302.802	-1.32757	0.158121	-8.39591	4.62284e-17	1.45312e-13	Mapk7
ENSMUSG00000001036	701.277	-0.318052	0.167503	-1.89879	0.0575926	0.293382	Epn2
ENSMUSG00000001039	70.2318	-0.0535489	0.213645	-0.250644	0.802089	0.930184	B9d1
ENSMUSG00000001052	1346.13	-0.0973731	0.1256	-0.775262	0.438185	0.759759	Sec24b
ENSMUSG00000001053	117.633	-0.468815	0.179079	-2.61792	0.00884682	0.103227	N4bp3
ENSMUSG00000001054	256.826	0.0671146	0.144829	0.463405	0.643074	0.868194	Rmnd5b
ENSMUSG00000001056	1405.37	0.22711	0.082511	2.75248	0.00591464	0.080603	Nhp2
ENSMUSG00000001062	188.894	-0.102929	0.219712	-0.468473	0.639446	0.865831	Vps9d1
ENSMUSG00000001065	202.889	0.14193	0.154326	0.919681	0.357739	0.698944	Zfp276
ENSMUSG00000001082	635.923	-0.0110633	0.114107	-0.0969553	0.922762	0.971339	Mfsd10
ENSMUSG00000001089	747.052	-0.17974	0.106765	-1.68351	0.0922766	0.377648	Luzp1
ENSMUSG00000001098	2677.08	-0.0164332	0.10076	-0.163092	0.870446	0.957053	Kctd10
ENSMUSG00000001100	885.58	-0.0348417	0.0688739	-0.505876	0.612944	0.852583	Poldip2
ENSMUSG00000001105	225.948	-0.166135	0.127743	-1.30054	0.193416	0.535981	Ift20
ENSMUSG00000001119	1356.19	-0.516137	0.193285	-2.67034	0.00757737	0.0939906	Col6a1
ENSMUSG00000001120	83.3236	-0.59189	0.292575	-2.02304	0.0430694	0.25373	Pcbp3
ENSMUSG00000001123	70.9996	0.0360986	0.22062	0.163623	0.870028	0.957025	Lgals9
ENSMUSG00000001127	454.691	0.11091	0.0934507	1.18682	0.235297	0.586599	Araf
ENSMUSG00000001128	30.483	0.313085	0.354367	0.883506	0.376963		Cfp
ENSMUSG00000001131	2370.03	-0.208514	0.0708207	-2.94426	0.00323732	0.0562144	Timp1
ENSMUSG00000001134	67.4383	-0.170488	0.243344	-0.700603	0.483551	0.786443	Uxt
ENSMUSG00000001138	153.361	0.0666766	0.215261	0.309748	0.756752	0.915091	Cnnm3
ENSMUSG00000001143	157.389	0.301945	0.196638	1.53554	0.124651	0.438943	Lman2l
ENSMUSG00000001150	679.683	0.00595417	0.108662	0.0547951	0.956302	0.983954	Mcm3ap
ENSMUSG00000001151	80.0801	-1.43106	1.62019	-0.883271	0.37709	0.713742	Pcnt
ENSMUSG00000001156	46.7128	0.170002	0.233075	0.729387	0.465765		Mxd1
ENSMUSG00000001157	259.111	-0.389773	0.117866	-3.30691	0.00094331	0.0257553	Gmcl1
ENSMUSG00000001158	323.981	-0.276514	0.126304	-2.18928	0.0285763	0.205794	Snrnp27
ENSMUSG00000001166	11.8937	0.346261	0.521055	0.664538	0.506346		Oas1c
ENSMUSG00000001173	475.189	0.0827248	0.138355	0.597919	0.549894	0.823787	Ocrl
ENSMUSG00000001175	3990.44	0.126418	0.0843193	1.49927	0.133803	0.45408	Calm1
ENSMUSG00000001211	765.954	-0.184123	0.100538	-1.83137	0.0670451	0.317965	Agpat3
ENSMUSG00000001227	144.657	-0.277041	0.2369	-1.16945	0.242224	0.593814	Sema6b
ENSMUSG00000001228	1813.58	-0.0563008	0.0834052	-0.675028	0.499658	0.796174	Uhrf1
ENSMUSG00000001229	981.069	0.0315552	0.0730793	0.431794	0.665891	0.877658	Dpp9
ENSMUSG00000001240	54.7863	-0.115213	0.350469	-0.32874	0.742352	0.90847	Ramp2
ENSMUSG00000001248	351.049	-0.334974	0.121874	-2.74853	0.00598636	0.0810344	Gramd1a
ENSMUSG00000001270	23.2406	0.557118	0.523176	1.06488	0.286931		Ckb
ENSMUSG00000001280	851.305	-0.144503	0.18038	-0.801102	0.423072	0.74857	Sp1
ENSMUSG00000001281	1337.58	0.497123	0.0828308	6.00167	1.95293e-09	7.23935e-07	Itgb7
ENSMUSG00000001285	429.64	0.0621819	0.119318	0.521143	0.602267	0.848544	Myg1
ENSMUSG00000001288	1392.46	-0.336078	0.0942787	-3.56474	0.000364223	0.0135536	Rarg
ENSMUSG00000001289	484.181	0.0707308	0.116482	0.607223	0.543703	0.820706	Pfdn5
ENSMUSG00000001300	1002	0.392392	0.131105	2.99297	0.0027628	0.0507197	Efnb2
ENSMUSG00000001305	447.347	0.0870978	0.113336	0.76849	0.442196	0.761754	Rrp15
ENSMUSG00000001313	96.0406	0.158982	0.204202	0.778553	0.436243	0.759195	Rnd2
ENSMUSG00000001323	68.663	-0.350006	0.265769	-1.31695	0.187854	0.528399	Srr
ENSMUSG00000001333	7.00857	0.271899	0.639753	0.425006	0.670832		Sync
ENSMUSG00000001349	28.4029	0.746549	0.372406	2.00466	0.0449992		Cnn1
ENSMUSG00000001366	204.122	0.0031239	0.124647	0.025062	0.980006	0.992584	Fbxo9
ENSMUSG00000001376	658.725	0.174614	0.0815558	2.14104	0.0322708	0.219341	Vps50
ENSMUSG00000001380	1423.38	0.06661	0.0611408	1.08945	0.275954	0.628968	Hars
ENSMUSG00000001383	365.845	-0.0365481	0.129758	-0.281664	0.778201	0.920546	Zmat2
ENSMUSG00000001403	1316.06	-0.00511645	0.11047	-0.0463151	0.963059	0.985463	Ube2c
ENSMUSG00000001415	2658.2	0.151988	0.0977362	1.55508	0.119926	0.430322	Smg5
ENSMUSG00000001416	5795.97	0.0456708	0.0577649	0.790633	0.429158	0.753316	Cct3
ENSMUSG00000001418	1045.73	-0.0697992	0.0983707	-0.709553	0.477982	0.782802	Glmp
ENSMUSG00000001419	1140.7	0.0832089	0.13034	0.638401	0.523213	0.808907	Mef2d
ENSMUSG00000001420	29.2725	-0.4388	0.316811	-1.38505	0.166037		Tmem79
ENSMUSG00000001424	3344.83	0.0704332	0.132074	0.533287	0.593835	0.84395	Snd1
ENSMUSG00000001435	167.185	0.156619	0.203323	0.770293	0.441126	0.761385	Col18a1
ENSMUSG00000001436	516.202	0.285859	0.123361	2.31726	0.0204897	0.169843	Slc19a1
ENSMUSG00000001440	12661.9	0.195989	0.0659595	2.97136	0.00296484	0.0532125	Kpnb1
ENSMUSG00000001441	1614.11	0.0197005	0.116602	0.168955	0.865832	0.95523	Npepps
ENSMUSG00000001445	537.719	0.103772	0.0819607	1.26612	0.205469	0.552696	Mrpl10
ENSMUSG00000001467	979.435	-0.129384	0.143382	-0.902372	0.366859	0.705606	Cyp51
ENSMUSG00000001472	1337.24	0.00163518	0.121717	0.0134343	0.989281	0.996368	Tcf25
ENSMUSG00000001473	4717.3	0.0327604	0.0766266	0.427533	0.668991	0.878899	Tubb6
ENSMUSG00000001482	698.39	-0.0800964	0.0842985	-0.950153	0.342035	0.686932	Def8
ENSMUSG00000001497	67.1289	-0.14932	0.213415	-0.699669	0.484134	0.787126	Pax9
ENSMUSG00000001504	401.243	-0.203824	0.170111	-1.19819	0.230845	0.581215	Irx2
ENSMUSG00000001506	1378.29	-0.327334	0.12317	-2.65758	0.00787045	0.0957771	Col1a1
ENSMUSG00000001507	2046.32	0.524605	0.158979	3.29984	0.000967417	0.0261175	Itga3
ENSMUSG00000001517	1843.73	-0.142048	0.0929265	-1.52861	0.126361	0.441096	Foxm1
ENSMUSG00000001518	341.887	-0.0127006	0.138569	-0.0916552	0.926972	0.97373	Itfg2
ENSMUSG00000001521	911.002	0.0922576	0.133431	0.691427	0.489297	0.789111	Tulp3
ENSMUSG00000001524	232.105	-0.00606473	0.184847	-0.0328096	0.973826	0.990015	Gtf2h4
ENSMUSG00000001525	16586.9	-0.0884284	0.0442416	-1.99876	0.0456343	0.26224	Tubb5
ENSMUSG00000001542	570.085	-0.195358	0.122292	-1.59747	0.11016	0.415223	Ell2
ENSMUSG00000001552	72.5024	0.00347439	0.491899	0.00706322	0.994364	0.998873	Jup
ENSMUSG00000001555	2182.05	0.0864135	0.0807439	1.07022	0.284522	0.635067	Fkbp10
ENSMUSG00000001569	694.901	0.105188	0.112833	0.932249	0.351208	0.694731	Nom1
ENSMUSG00000001576	1248.7	0.157996	0.131634	1.20027	0.230036	0.58054	Ergic1
ENSMUSG00000001622	18.0877	1.52281	0.593251	2.56689	0.0102615		Csn3
ENSMUSG00000001627	1861.65	-0.137181	0.0969829	-1.41448	0.157221	0.485713	Ifrd1
ENSMUSG00000001630	328.762	-0.0737165	0.123368	-0.597534	0.550151	0.823787	Stk38l
ENSMUSG00000001632	437.61	0.083803	0.216268	0.387496	0.698389	0.891225	Brpf1
ENSMUSG00000001642	3960.43	0.324992	0.0820598	3.96043	7.48142e-05	0.00465199	Akr1b3
ENSMUSG00000001656	163.796	0.102608	0.163386	0.628011	0.529997	0.813653	Hoxc11
ENSMUSG00000001657	28.2464	-0.718694	0.360622	-1.99293	0.0462692		Hoxc8
ENSMUSG00000001661	98.2383	-0.0319952	0.205337	-0.155818	0.876177	0.958523	Hoxc6
ENSMUSG00000001663	7.68335	-0.0256241	0.629231	-0.0407229	0.967517		Gstt1
ENSMUSG00000001665	22.2791	0.0930612	0.410065	0.226942	0.820469		Gstt3
ENSMUSG00000001666	86.6756	-0.269831	0.206136	-1.309	0.190536	0.531937	Ddt
ENSMUSG00000001674	1419.8	0.175225	0.0667797	2.62392	0.0086924	0.10199	Ddx18
ENSMUSG00000001687	267.86	0.273279	0.188393	1.45058	0.146898	0.470679	Ubl3
ENSMUSG00000001700	71.5379	0.329418	0.376143	0.87578	0.38115	0.714978	Gramd3
ENSMUSG00000001707	460.841	0.207457	0.0967385	2.14451	0.0319919	0.218369	Eef1e1
ENSMUSG00000001729	4714.13	-0.0075066	0.0667238	-0.112503	0.910425	0.968404	Akt1
ENSMUSG00000001739	7.62949	0.68887	0.676088	1.01891	0.308248		Cldn15
ENSMUSG00000001741	105.311	-0.795619	0.474818	-1.67563	0.0938111	0.381185	Il16
ENSMUSG00000001750	942.821	-0.0347365	0.110715	-0.313746	0.753714	0.913862	Tcirg1
ENSMUSG00000001751	139.105	-0.182416	0.180311	-1.01167	0.311695	0.658075	Naglu
ENSMUSG00000001755	234.973	0.0664975	0.175275	0.379389	0.704399	0.893172	Coasy
ENSMUSG00000001761	1286.91	-0.22	0.0732644	-3.00282	0.00267491	0.0496739	Smo
ENSMUSG00000001767	455.533	-0.0138278	0.103066	-0.134164	0.893273	0.963996	Crnkl1
ENSMUSG00000001768	407.123	0.0100603	0.156119	0.0644396	0.94862	0.981983	Rin2
ENSMUSG00000001774	665.149	0.187771	0.0913106	2.0564	0.0397438	0.244448	Chordc1
ENSMUSG00000001783	1738.94	0.164019	0.0657147	2.49593	0.0125628	0.128263	Rtcb
ENSMUSG00000001785	658.773	-0.0263029	0.0755569	-0.348121	0.727749	0.903407	Pwp1
ENSMUSG00000001786	131.832	0.0536293	0.183051	0.292975	0.769541	0.918039	Fbxo7
ENSMUSG00000001794	583.64	-0.649363	0.240835	-2.69629	0.00701155	0.0901031	Capns1
ENSMUSG00000001829	373.542	0.217715	0.133664	1.62883	0.103349	0.402442	Clpb
ENSMUSG00000001833	3411.39	0.0637507	0.0684794	0.930948	0.35188	0.694731	Sept7
ENSMUSG00000001844	192.712	-0.150833	0.132804	-1.13576	0.256058	0.609055	Zdhhc4
ENSMUSG00000001847	5433.42	0.0687254	0.0519554	1.32278	0.185909	0.526749	Rac1
ENSMUSG00000001855	736.087	0.166524	0.1948	0.854849	0.392634	0.725084	Nup214
ENSMUSG00000001864	376.803	0.0784176	0.157947	0.496481	0.619555	0.854866	Aif1l
ENSMUSG00000001870	2597.52	0.312606	0.0915569	3.41434	0.000639369	0.0204048	Ltbp1
ENSMUSG00000001891	796.13	-0.00571753	0.0919348	-0.0621912	0.950411	0.98264	Ugp2
ENSMUSG00000001909	900.148	0.0540688	0.101322	0.533634	0.593595	0.84395	Trmt1
ENSMUSG00000001910	2639.39	0.00917848	0.0687961	0.133416	0.893865	0.963996	Nacc1
ENSMUSG00000001911	3344.9	-0.373955	0.0782593	-4.77841	1.76689e-06	0.000270307	Nfix
ENSMUSG00000001918	911.217	0.312808	0.153801	2.03386	0.0419662	0.250912	Slc1a5
ENSMUSG00000001924	7018.37	0.080383	0.0865135	0.929138	0.352817	0.695014	Uba1
ENSMUSG00000001942	37.814	0.376333	0.610071	0.616867	0.537323		Siae
ENSMUSG00000001962	472.76	-0.0522795	0.0998066	-0.523809	0.600412	0.847474	Fam50a
ENSMUSG00000001964	513.746	0.0252218	0.0998214	0.252669	0.800524	0.929428	Emd
ENSMUSG00000001983	77.2761	-0.055352	0.191727	-0.288703	0.772809	0.91864	Taco1
ENSMUSG00000001986	106.127	0.316464	0.224569	1.4092	0.158775	0.487969	Gria3
ENSMUSG00000001995	23.2241	-0.993162	1.96219	-0.50615	0.612751		Sipa1l2
ENSMUSG00000001998	150.615	0.194134	0.165136	1.1756	0.239755	0.591442	Ap4e1
ENSMUSG00000001999	188.711	-0.139644	0.177789	-0.785447	0.432192	0.755845	Blvra
ENSMUSG00000002006	97.869	-0.65485	0.224371	-2.91861	0.00351601	0.0588955	Pdzd4
ENSMUSG00000002010	824.916	0.0126745	0.0851889	0.148781	0.881726	0.960178	Idh3g
ENSMUSG00000002012	8.97524	-0.297322	0.733483	-0.405357	0.685215		Pnck
ENSMUSG00000002014	521.086	-0.136311	0.106888	-1.27527	0.202214	0.547613	Ssr4
ENSMUSG00000002015	1240.79	0.0568987	0.0900977	0.631522	0.527699	0.812065	Bcap31
ENSMUSG00000002017	744.853	0.182487	0.0704437	2.59054	0.00958252	0.108019	Fam98a
ENSMUSG00000002020	1418.97	-0.567694	0.21578	-2.63089	0.00851612	0.100833	Ltbp2
ENSMUSG00000002028	539.449	0.183133	0.113912	1.60767	0.107908	0.410806	Kmt2a
ENSMUSG00000002031	378.154	0.496821	0.254944	1.94875	0.0513256	0.276188	Ift46
ENSMUSG00000002043	68.3327	-0.534862	0.288548	-1.85363	0.063792	0.310605	Trappc6a
ENSMUSG00000002052	1871.27	0.261239	0.0770647	3.38986	0.000699281	0.0211939	Supt6
ENSMUSG00000002055	538.477	-0.03994	0.110145	-0.362613	0.716894	0.898261	Spag5
ENSMUSG00000002058	128.795	0.174032	0.146854	1.18507	0.235991	0.587226	Unc119
ENSMUSG00000002059	1173.85	-0.0432103	0.0874756	-0.493969	0.621328	0.855523	Rab34
ENSMUSG00000002064	324.26	-0.0599984	0.117825	-0.509214	0.610602	0.851292	Sdf2
ENSMUSG00000002068	421.684	-0.172699	0.109725	-1.57393	0.115503	0.421353	Ccne1
ENSMUSG00000002083	65.75	-0.148266	0.277014	-0.535228	0.592492	0.84395	Bbc3
ENSMUSG00000002102	2218.47	0.2007	0.0697679	2.87668	0.00401879	0.0636227	Psmc3
ENSMUSG00000002103	280.772	0.0835404	0.191764	0.435642	0.663096	0.877234	Acp2
ENSMUSG00000002104	10.3747	0.711159	0.605515	1.17447	0.240207		Rapsn
ENSMUSG00000002105	627.541	0.130736	0.114245	1.14435	0.25248	0.604977	Slc39a13
ENSMUSG00000002107	841.793	0.213029	0.106076	2.00826	0.0446152	0.259662	Celf2
ENSMUSG00000002108	5.21224	0.853658	0.831762	1.02632	0.304739		Nr1h3
ENSMUSG00000002109	30.3859	-0.153187	0.335039	-0.45722	0.647513		Ddb2
ENSMUSG00000002129	1475.18	0.0741793	0.0832597	0.890938	0.372962	0.710286	Sf3a1
ENSMUSG00000002147	953.759	-0.502932	0.0974197	-5.16253	2.43637e-07	4.99611e-05	Stat6
ENSMUSG00000002190	8.99086	0.116758	0.897913	0.130033	0.896541		Clgn
ENSMUSG00000002205	162.442	0.0136627	0.173031	0.0789611	0.937064	0.977875	Vrk3
ENSMUSG00000002210	344.789	-0.249908	0.102981	-2.42675	0.0152346	0.14353	Smg9
ENSMUSG00000002221	626.012	0.0255152	0.110981	0.229906	0.818165	0.936284	Paxip1
ENSMUSG00000002222	424.314	0.169255	0.166444	1.01689	0.309204	0.654969	Rmnd5a
ENSMUSG00000002227	485.465	-0.265595	0.118547	-2.24041	0.0250642	0.189287	Mov10
ENSMUSG00000002228	5.60085	1.49619	0.869705	1.72034	0.0853701		Ppm1j
ENSMUSG00000002233	1699.69	-0.00495488	0.148256	-0.0334211	0.973339	0.990015	Rhoc
ENSMUSG00000002249	87.005	-0.218436	0.264555	-0.825673	0.40899	0.738726	Tead3
ENSMUSG00000002250	610.436	0.0302743	0.185039	0.16361	0.870038	0.957025	Ppard
ENSMUSG00000002257	8.26985	-0.566579	0.722208	-0.784509	0.432741		Def6
ENSMUSG00000002274	115.511	-0.211534	0.745533	-0.283736	0.776613	0.920324	Metrn
ENSMUSG00000002279	105.222	0.215706	0.162125	1.33049	0.183357	0.523148	Lmf1
ENSMUSG00000002280	134.993	0.047526	0.314519	0.151107	0.879892	0.95978	Ciao3
ENSMUSG00000002289	420.704	0.073309	0.307406	0.238477	0.811511	0.93401	Angptl4
ENSMUSG00000002297	1204.88	0.0992009	0.0736458	1.347	0.17798	0.515954	Dbf4
ENSMUSG00000002307	370.515	-0.0587519	0.127339	-0.461381	0.644525	0.868821	Daxx
ENSMUSG00000002308	216.44	-0.162892	0.169914	-0.958671	0.337725	0.682388	Cd320
ENSMUSG00000002319	1955.7	0.0295035	0.0758737	0.388851	0.697387	0.890961	Ipo4
ENSMUSG00000002320	807.985	0.0159556	0.0869396	0.183526	0.854386	0.950984	Tm9sf1
ENSMUSG00000002325	168.711	-0.132964	0.232854	-0.57102	0.567986	0.832459	Irf9
ENSMUSG00000002326	232.232	-0.0251763	0.134924	-0.186596	0.851977	0.94929	Gmpr2
ENSMUSG00000002329	100.562	-0.60052	0.286594	-2.09537	0.0361383	0.232356	Mdp1
ENSMUSG00000002332	331.373	0.134542	0.133602	1.00704	0.313918	0.660887	Dhrs1
ENSMUSG00000002342	447.288	0.137916	0.123279	1.11873	0.263256	0.616123	Tmem161a
ENSMUSG00000002343	199.124	-0.154532	0.164909	-0.937073	0.348721	0.692107	Armc6
ENSMUSG00000002345	126.813	-0.184495	0.154098	-1.19725	0.231208	0.581215	Borcs8
ENSMUSG00000002346	30.2681	0.177184	0.311658	0.568523	0.56968		Slc25a42
ENSMUSG00000002365	3055.41	0.0849831	0.0886321	0.95883	0.337644	0.682388	Snx9
ENSMUSG00000002372	910.261	-0.0359109	0.0757146	-0.474293	0.635291	0.863601	Ranbp3
ENSMUSG00000002379	262.27	-0.119819	0.125123	-0.957609	0.33826	0.682897	Ndufa11
ENSMUSG00000002393	682.57	0.109865	0.0940933	1.16761	0.242962	0.593814	Nr2f6
ENSMUSG00000002395	425.44	-0.256412	0.138307	-1.85394	0.0637477	0.310605	Use1
ENSMUSG00000002396	26.9873	-0.387441	0.400402	-0.967629	0.33323		Ocel1
ENSMUSG00000002409	77.0295	-0.419585	0.211671	-1.98225	0.0474511	0.267175	Dyrk1b
ENSMUSG00000002413	314.355	0.0626175	0.161013	0.388896	0.697353	0.890961	Braf
ENSMUSG00000002416	160.261	-0.346159	0.169079	-2.04732	0.0406269	0.246848	Ndufb2
ENSMUSG00000002428	281.201	-0.0177963	0.139198	-0.127849	0.898268	0.964372	Hltf
ENSMUSG00000002455	801.236	-0.128342	0.0739101	-1.73646	0.0824821	0.355211	Prpf6
ENSMUSG00000002458	366.219	-0.0282713	0.221245	-0.127783	0.898321	0.964372	Rgs19
ENSMUSG00000002459	32.2854	0.0883228	0.490739	0.179979	0.857169		Rgs20
ENSMUSG00000002477	959.893	-0.0461339	0.0886573	-0.520362	0.602811	0.848697	Snrpd1
ENSMUSG00000002486	130.063	-0.514722	0.18822	-2.73468	0.00624416	0.0827802	Tchp
ENSMUSG00000002489	147.295	0.290848	0.259845	1.11931	0.263006	0.616123	Tiam1
ENSMUSG00000002504	47.0791	0.0990174	0.230879	0.428871	0.668017		Slc9a3r2
ENSMUSG00000002524	1793.8	-0.0791103	0.0617996	-1.28011	0.200507	0.545438	Puf60
ENSMUSG00000002546	723.182	-0.0216702	0.0882111	-0.245663	0.805943	0.931317	Golga2
ENSMUSG00000002550	453.489	0.0833472	0.102455	0.8135	0.415931	0.744425	Uck1
ENSMUSG00000002565	9.39666	-0.558469	0.5562	-1.00408	0.315341		Scin
ENSMUSG00000002580	147.424	0.0603644	0.194681	0.310068	0.756509	0.915091	Mien1
ENSMUSG00000002602	9168.36	-0.247575	0.0728225	-3.3997	0.000674599	0.0207725	Axl
ENSMUSG00000002603	416.269	0.0776067	0.17716	0.438061	0.661342	0.876756	Tgfb1
ENSMUSG00000002608	413.828	-0.0374358	0.141128	-0.26526	0.790809	0.926102	Ccdc97
ENSMUSG00000002617	31.9128	0.566675	0.475967	1.19058	0.23382		Zfp40
ENSMUSG00000002625	131.759	0.432289	0.164032	2.63539	0.00840398	0.099997	Akap8l
ENSMUSG00000002635	133.873	-0.0365896	0.155372	-0.235497	0.813823	0.934774	Pdcd2l
ENSMUSG00000002658	944.12	0.0568613	0.0763807	0.744446	0.456607	0.770951	Gtf2f1
ENSMUSG00000002660	480.047	0.0899601	0.126526	0.711002	0.477083	0.782631	Clpp
ENSMUSG00000002661	47.0414	-0.343492	0.254349	-1.35048	0.176863		Alkbh7
ENSMUSG00000002679	175.321	0.0118488	0.151288	0.0783196	0.937574	0.978064	Med6
ENSMUSG00000002688	207.418	0.0548197	0.146436	0.374361	0.708136	0.894509	Prkd1
ENSMUSG00000002718	2301.27	0.0708603	0.0473418	1.49678	0.13445	0.45479	Cse1l
ENSMUSG00000002728	538.386	0.0320266	0.104173	0.307438	0.75851	0.915091	Naa20
ENSMUSG00000002731	127.449	-0.248421	0.178133	-1.39458	0.163142	0.495427	Prkra
ENSMUSG00000002732	93.6696	0.195545	0.168258	1.16217	0.245165	0.596241	Fkbp7
ENSMUSG00000002733	776.147	0.126133	0.0823767	1.53117	0.125727	0.439947	Plekha3
ENSMUSG00000002741	1388.7	0.0371676	0.0779733	0.476671	0.633597	0.862655	Ykt6
ENSMUSG00000002748	3339.4	0.0166168	0.0711075	0.233685	0.815229	0.934774	Baz1b
ENSMUSG00000002763	252.463	-0.228324	0.178672	-1.2779	0.201285	0.546309	Pex6
ENSMUSG00000002767	487.618	0.0256228	0.449357	0.0570209	0.954529	0.983614	Mrpl2
ENSMUSG00000002768	229.815	-0.106687	0.177365	-0.601509	0.547501	0.822447	Mea1
ENSMUSG00000002771	13.8793	-0.466887	0.905724	-0.515485	0.606214		Grin2d
ENSMUSG00000002778	518.77	-0.0808939	0.108945	-0.742523	0.457771	0.771597	Kdelr1
ENSMUSG00000002781	42.1068	-1.21848	0.617542	-1.97312	0.0484822		Tmem143
ENSMUSG00000002797	122.699	0.20461	0.240639	0.850276	0.395172	0.72693	Ggct
ENSMUSG00000002803	30.3939	1.28873	0.861778	1.49543	0.134803		Btbd6
ENSMUSG00000002804	8.04273	-2.61654	1.43352	-1.82526	0.0679618		Nudt14
ENSMUSG00000002808	276.811	0.0764616	0.111381	0.686487	0.492406	0.791232	Epdr1
ENSMUSG00000002812	1507.83	0.166735	0.105886	1.57466	0.115334	0.421353	Flii
ENSMUSG00000002814	301.245	0.0826764	0.159962	0.516852	0.60526	0.849355	Top3a
ENSMUSG00000002820	17.8631	0.318587	0.448735	0.709967	0.477725		Atg4d
ENSMUSG00000002825	146.798	-0.140712	0.133826	-1.05145	0.29305	0.642205	Qtrt1
ENSMUSG00000002831	28.0062	0.461455	0.947624	0.48696	0.626287		Plin4
ENSMUSG00000002833	135.923	-0.786333	0.243756	-3.2259	0.00125575	0.030563	Hdgfl2
ENSMUSG00000002835	1179.68	-0.130656	0.0856339	-1.52575	0.127073	0.442781	Chaf1a
ENSMUSG00000002844	563.33	-0.237319	0.0835593	-2.84012	0.00450963	0.0678338	Adprh
ENSMUSG00000002845	286.923	-0.107458	0.136252	-0.788671	0.430304	0.754049	Tmem39a
ENSMUSG00000002846	201.4	-0.118559	0.125266	-0.946457	0.343915	0.687831	Timmdc1
ENSMUSG00000002847	18.4295	0.445815	0.469218	0.950123	0.34205		Pla1a
ENSMUSG00000002870	2327.03	0.157612	0.0802658	1.96363	0.0495732	0.272603	Mcm2
ENSMUSG00000002871	87.6671	0.428625	0.410006	1.04541	0.295832	0.643329	Tpra1
ENSMUSG00000002881	1371.81	-0.195849	0.104963	-1.86589	0.062057	0.305624	Nab1
ENSMUSG00000002885	42.3667	0.123337	0.274066	0.450025	0.652693		Adgre5
ENSMUSG00000002897	45.4761	-0.283608	0.26711	-1.06176	0.288343		Il17ra
ENSMUSG00000002900	5797.3	0.354917	0.100018	3.54852	0.000387398	0.0140366	Lamb1
ENSMUSG00000002910	21.9487	-0.202297	0.491974	-0.411195	0.68093		Arrdc2
ENSMUSG00000002944	8.32302	-0.73533	1.38343	-0.531527	0.595054		Cd36
ENSMUSG00000002948	712.375	0.0726108	0.150906	0.481167	0.630398	0.860721	Map2k7
ENSMUSG00000002949	512.383	0.0584632	0.128094	0.45641	0.648095	0.870689	Timm44
ENSMUSG00000002957	2450.11	0.227252	0.0755437	3.00822	0.0026278	0.0492092	Ap2a2
ENSMUSG00000002963	241.765	-0.487083	0.281914	-1.72777	0.0840292	0.359117	Pnkp
ENSMUSG00000002968	135.968	-0.0603365	0.294003	-0.205224	0.837397	0.944708	Med25
ENSMUSG00000002981	403.46	0.0928534	0.130477	0.711645	0.476685	0.782631	Clptm1
ENSMUSG00000002983	248.888	0.0303609	0.171526	0.177005	0.859505	0.95305	Relb
ENSMUSG00000002984	1398.28	0.001489	0.0720095	0.0206779	0.983503	0.994127	Tomm40
ENSMUSG00000002985	57.7626	-0.362045	0.362591	-0.998494	0.31804	0.664917	Apoe
ENSMUSG00000002996	279.704	-0.339599	0.15722	-2.16002	0.0307708	0.214056	Hbp1
ENSMUSG00000002997	920.172	-0.0484291	0.163022	-0.29707	0.766413	0.917598	Prkar2b
ENSMUSG00000003031	305.645	-0.0167683	0.115159	-0.145611	0.884229	0.960261	Cdkn1b
ENSMUSG00000003032	803.128	-0.0141777	0.173004	-0.08195	0.934687	0.977592	Klf4
ENSMUSG00000003033	975.347	-0.101151	0.0765568	-1.32126	0.186415	0.526866	Ap1m1
ENSMUSG00000003037	588.64	0.205052	0.202356	1.01332	0.310906	0.65695	Rab8a
ENSMUSG00000003038	2589.91	-0.226175	0.0992898	-2.27793	0.0227309	0.178965	Hmgn2
ENSMUSG00000003039	585.197	-0.198576	0.0980904	-2.02442	0.0429272	0.253486	Fam32a
ENSMUSG00000003062	153.521	-0.107056	0.177623	-0.602716	0.546697	0.822447	Stard3nl
ENSMUSG00000003068	909.423	-0.0829547	0.0916906	-0.904724	0.365612	0.704959	Stk11
ENSMUSG00000003070	10.5779	-0.296227	0.550021	-0.538573	0.590181		Efna2
ENSMUSG00000003072	1520.15	0.025777	0.0960555	0.268355	0.788426	0.924752	Atp5d
ENSMUSG00000003099	1002.71	0.0775952	0.0990808	0.78315	0.433539	0.756828	Ppp5c
ENSMUSG00000003119	621.041	0.162852	0.130993	1.24321	0.213791	0.563495	Cdk12
ENSMUSG00000003123	25.1415	-0.314915	0.388397	-0.810806	0.417477		Lipe
ENSMUSG00000003131	1626.98	-0.0425727	0.0732629	-0.581095	0.561177	0.829563	Pafah1b2
ENSMUSG00000003135	513.322	0.0317651	0.158232	0.20075	0.840894	0.945907	Cnot11
ENSMUSG00000003153	113.399	0.690107	0.204154	3.38032	0.00072401	0.0216708	Slc2a3
ENSMUSG00000003154	327.171	0.022025	0.101937	0.216065	0.828937	0.94047	Foxj2
ENSMUSG00000003161	775.125	0.153507	0.0868745	1.767	0.0772283	0.342158	Sri
ENSMUSG00000003166	947.338	-0.0318756	0.0921727	-0.345824	0.729475	0.903911	Dgcr2
ENSMUSG00000003178	28.7544	1.21272	1.01402	1.19595	0.231714
ENSMUSG00000003184	132.079	-0.336393	0.243094	-1.38379	0.166421	0.501055	Irf3
ENSMUSG00000003190	48.3302	-0.300732	0.335476	-0.896433	0.370021		Bcl2l12
ENSMUSG00000003198	49.2288	0.21659	0.235121	0.921188	0.356952		Zfp959
ENSMUSG00000003199	355.538	-0.419667	0.124316	-3.37582	0.000735968	0.0218692	Mpnd
ENSMUSG00000003200	789.495	0.00526606	0.0962202	0.0547292	0.956354	0.983954	Sh3gl1
ENSMUSG00000003208	65.9045	-0.167834	0.218712	-0.767373	0.44286	0.761754	Yju2
ENSMUSG00000003226	1679.87	0.259782	0.127128	2.04348	0.0410054	0.24747	Ranbp2
ENSMUSG00000003228	166.966	-0.212027	0.165958	-1.27759	0.201394	0.546309	Grk5
ENSMUSG00000003233	346.325	-0.580478	0.111748	-5.19451	2.05261e-07	4.3068e-05	Dvl3
ENSMUSG00000003234	327.096	-0.0444092	0.23407	-0.189726	0.849523	0.948969	Abcf3
ENSMUSG00000003235	733.77	0.169948	0.0940357	1.80727	0.07072	0.327691	Eif2b5
ENSMUSG00000003269	63.405	0.277821	0.22996	1.20813	0.226998	0.577563	Cyth2
ENSMUSG00000003279	8.95751	1.35211	0.662366	2.04133	0.0412181		Dlgap1
ENSMUSG00000003282	49.5847	-0.278661	0.385105	-0.723596	0.469314		Plag1
ENSMUSG00000003299	406.963	-0.163679	0.110028	-1.4876	0.136856	0.45786	Mrpl4
ENSMUSG00000003308	741.887	-0.104332	0.115998	-0.89943	0.368424	0.70664	Keap1
ENSMUSG00000003316	2757.78	0.0992071	0.0674748	1.47028	0.141485	0.464074	Glg1
ENSMUSG00000003344	316.912	-0.0734703	0.156724	-0.468788	0.639221	0.865761	Btbd2
ENSMUSG00000003345	1200.34	-0.253097	0.0721753	-3.5067	0.000453702	0.0157862	Csnk1g2
ENSMUSG00000003346	578.314	0.232843	0.161681	1.44014	0.149829	0.474287	Abhd17a
ENSMUSG00000003348	446.92	0.0440764	0.103225	0.426993	0.669384	0.878944	Mob3a
ENSMUSG00000003352	267.238	-0.13433	0.147539	-0.910468	0.362576	0.70367	Cacnb3
ENSMUSG00000003354	5.15447	0.31112	0.778836	0.399468	0.689549		Ccdc65
ENSMUSG00000003355	176.962	-0.0595672	0.144132	-0.413284	0.679399	0.881699	Fkbp11
ENSMUSG00000003360	1807.9	-0.0451906	0.0746804	-0.60512	0.545099	0.821731	Ddx23
ENSMUSG00000003363	407.457	0.264443	0.193691	1.36528	0.172165	0.508526	Pld3
ENSMUSG00000003378	32.9539	-1.63604	2.35109	-0.695866	0.486513		Grik5
ENSMUSG00000003380	338.27	-0.0183374	0.164966	-0.111159	0.91149	0.96863	Rabac1
ENSMUSG00000003382	268.308	0.24291	0.117496	2.06739	0.0386971	0.2414	Etv3
ENSMUSG00000003402	1674.83	0.10879	0.0930841	1.16873	0.242514	0.593814	Prkcsh
ENSMUSG00000003411	12.1571	0.0436217	0.562321	0.0775743	0.938167		Rab3b
ENSMUSG00000003420	65.5398	-0.5114	0.282745	-1.80869	0.0704986	0.327075	Fcgrt
ENSMUSG00000003421	396.551	-0.0654164	0.112582	-0.581053	0.561205	0.829563	Nosip
ENSMUSG00000003423	119.661	-0.753051	0.255603	-2.94618	0.00321727	0.0560724	Pih1d1
ENSMUSG00000003429	3706.78	-0.00174237	0.0746633	-0.0233364	0.981382	0.993233	Rps11
ENSMUSG00000003435	1124.99	0.0275441	0.100583	0.273844	0.784204	0.923416	Supt5
ENSMUSG00000003437	461.863	-0.0410004	0.133298	-0.307583	0.758399	0.915091	Paf1
ENSMUSG00000003438	640.529	-0.102617	0.0886247	-1.15788	0.246912	0.598688	Timm50
ENSMUSG00000003444	158.897	0.147624	0.139471	1.05846	0.289847	0.639547	Med29
ENSMUSG00000003452	78.7666	-0.21709	0.343157	-0.632627	0.526977	0.811732	Bicd1
ENSMUSG00000003458	1306.03	0.0668656	0.0750294	0.891192	0.372826	0.710286	Ncstn
ENSMUSG00000003464	432.28	0.0379481	0.124213	0.305509	0.759979	0.915091	Pex19
ENSMUSG00000003477	17.4684	0.116	0.542939	0.213651	0.830819		Inmt
ENSMUSG00000003500	872.016	0.369406	0.12141	3.04263	0.00234517	0.0463089	Impdh1
ENSMUSG00000003518	448.598	0.444397	0.166323	2.6719	0.00754235	0.0939188	Dusp3
ENSMUSG00000003526	13.7082	0.191969	0.603007	0.318353	0.750217		Prodh
ENSMUSG00000003527	187.668	0.142859	0.129902	1.09974	0.271444	0.624387	Ess2
ENSMUSG00000003528	429.453	-0.0236566	0.154924	-0.152698	0.878636	0.959628	Slc25a1
ENSMUSG00000003531	150.342	0.0103155	0.217032	0.0475298	0.962091	0.985278	Dgcr6
ENSMUSG00000003534	303.73	-0.0882375	0.110951	-0.79528	0.426451	0.751258	Ddr1
ENSMUSG00000003541	1900.04	-0.137898	0.162152	-0.850424	0.39509	0.72693	Ier3
ENSMUSG00000003545	141.125	0.296476	0.334384	0.886633	0.375277	0.712339	Fosb
ENSMUSG00000003546	66.2215	-0.889657	0.6211	-1.43239	0.152032	0.477442	Klc4
ENSMUSG00000003549	514.395	-0.157505	0.150786	-1.04456	0.296227	0.643532	Ercc1
ENSMUSG00000003559	34.2322	0.690589	0.743607	0.928703	0.353043		As3mt
ENSMUSG00000003573	716.902	0.104206	0.119615	0.871184	0.383654	0.716045	Homer3
ENSMUSG00000003575	363.204	-0.128623	0.14373	-0.894891	0.370845	0.708882	Crtc1
ENSMUSG00000003581	144.076	-0.137168	0.181851	-0.75429	0.450675	0.767287	Rnf215
ENSMUSG00000003585	18.2604	0.222752	0.75782	0.293939	0.768805		Sec14l2
ENSMUSG00000003604	300.919	0.141668	0.135543	1.04519	0.295935	0.643408	Aven
ENSMUSG00000003617	324.839	-1.08524	0.240252	-4.51711	6.26883e-06	0.000678932	Cp
ENSMUSG00000003623	294.207	-0.0695213	0.106749	-0.651262	0.514877	0.803297	Crot
ENSMUSG00000003644	98.7244	0.800152	0.47206	1.69502	0.0900711	0.373539	Rps6ka1
ENSMUSG00000003660	2135.12	0.0934497	0.0622786	1.50051	0.133483	0.453538	Snrnp200
ENSMUSG00000003662	331.48	0.091375	0.107131	0.852931	0.393698	0.726212	Ciao1
ENSMUSG00000003665	118.448	-0.48641	0.344086	-1.41363	0.157471	0.485713	Has1
ENSMUSG00000003680	291.44	-0.289793	0.305083	-0.949881	0.342173	0.687054	Taf6l
ENSMUSG00000003721	404.291	0.477082	0.553081	0.862589	0.388364	0.720648	Insig2
ENSMUSG00000003731	1251.43	0.36753	0.180679	2.03416	0.0419356	0.250885	Kpna6
ENSMUSG00000003746	460.249	0.178047	0.110229	1.61525	0.106257	0.407694	Man1a
ENSMUSG00000003752	100.341	-0.218449	0.211946	-1.03068	0.30269	0.649739	Itpkc
ENSMUSG00000003762	87.8393	-0.478941	0.243946	-1.96331	0.0496107	0.272603	Coq8b
ENSMUSG00000003778	797.313	-0.106389	0.0785044	-1.3552	0.175353	0.512594	Brd8
ENSMUSG00000003779	2002.86	0.0391727	0.0852194	0.459669	0.645753	0.869606	Kif20a
ENSMUSG00000003808	877.581	-0.0286195	0.068474	-0.417962	0.675975	0.880293	Farsa
ENSMUSG00000003809	188.07	-0.544871	0.173871	-3.13377	0.00172575	0.038681	Gcdh
ENSMUSG00000003810	1692.49	0.112578	0.091814	1.22615	0.220143	0.572359	Mast2
ENSMUSG00000003812	176.332	-0.270184	0.149942	-1.80192	0.0715581	0.329549	Dnase2a
ENSMUSG00000003813	951.472	0.0200849	0.0856567	0.234481	0.814612	0.934774	Rad23a
ENSMUSG00000003814	11475	0.0494745	0.0839932	0.58903	0.555841	0.827111	Calr
ENSMUSG00000003824	54.9201	0.31425	0.297302	1.057	0.290509	0.640213	Syce2
ENSMUSG00000003847	1231.83	0.154099	0.190977	0.806899	0.419725	0.745966	Nfat5
ENSMUSG00000003848	858.812	0.0676639	0.063124	1.07192	0.283755	0.634522	Nob1
ENSMUSG00000003849	336.479	0.0164829	0.185705	0.0887586	0.929274	0.974787	Nqo1
ENSMUSG00000003865	647.077	-0.331102	0.0842727	-3.92893	8.53231e-05	0.00501429	Gys1
ENSMUSG00000003868	1117.82	-0.0796334	0.0986209	-0.807469	0.419396	0.745966	Ruvbl2
ENSMUSG00000003873	558.699	-0.0170919	0.125837	-0.135825	0.89196	0.963996	Bax
ENSMUSG00000003923	432.411	0.0235607	0.125152	0.188256	0.850676	0.949197	Tfam
ENSMUSG00000003929	82.6708	0.096056	0.23466	0.409341	0.68229	0.882909	Zfp81
ENSMUSG00000003934	17.3722	0.146207	0.422921	0.345707	0.729563		Efnb3
ENSMUSG00000003948	1211.72	0.266689	0.134302	1.98574	0.0470618	0.266813	Mmd
ENSMUSG00000003949	116.203	-1.40136	0.339556	-4.12705	3.67448e-05	0.00300124	Hlf
ENSMUSG00000003955	5.84534	-1.03724	0.804117	-1.28991	0.197081		Fam162a
ENSMUSG00000003970	9065.22	-0.0321178	0.101732	-0.315709	0.752223	0.913162	Rpl8
ENSMUSG00000003992	124.631	-0.492723	0.172043	-2.86396	0.00418386	0.0649341	Ssbp2
ENSMUSG00000004018	112.635	0.0167174	0.202788	0.082438	0.934298	0.977398	Fancl
ENSMUSG00000004032	71.0961	-0.33075	0.266057	-1.24316	0.21381	0.563495	Gstm5
ENSMUSG00000004040	1232.93	-0.158304	0.236364	-0.669746	0.50302	0.797648	Stat3
ENSMUSG00000004043	87.7266	-0.324148	0.263215	-1.2315	0.218137	0.568793	Stat5a
ENSMUSG00000004044	4773.45	-0.181808	0.0935307	-1.94383	0.0519157	0.276728	Cavin1
ENSMUSG00000004054	272.068	-0.21472	0.206033	-1.04216	0.297336	0.644562	Map3k11
ENSMUSG00000004056	1080.91	0.0204903	0.129377	0.158377	0.87416	0.957839	Akt2
ENSMUSG00000004069	450.325	0.225133	0.0911248	2.4706	0.0134886	0.134579	Dnaja3
ENSMUSG00000004070	380.543	-0.042472	0.127346	-0.333516	0.738745	0.907751	Hmox2
ENSMUSG00000004071	299.047	0.0155512	0.129467	0.120117	0.904391	0.96507	Cdip1
ENSMUSG00000004085	599.956	0.316325	0.104757	3.01961	0.002531	0.0483045	Map3k20
ENSMUSG00000004096	497.512	0.141706	0.139564	1.01535	0.309939	0.655805	Cwc15
ENSMUSG00000004098	204.846	0.110096	0.325231	0.338515	0.734975	0.905727	Col5a3
ENSMUSG00000004099	3353.78	-0.0546049	0.0802304	-0.6806	0.496124	0.794378	Dnmt1
ENSMUSG00000004100	848.293	-0.0167803	0.0974271	-0.172234	0.863253	0.953914	Ppan
ENSMUSG00000004105	4341.36	0.0137784	0.105777	0.130258	0.896362	0.964372	Angptl2
ENSMUSG00000004127	268.68	0.362246	0.193336	1.87365	0.060978	0.302473	Trmt10a
ENSMUSG00000004151	289.633	-0.433085	0.250684	-1.72762	0.084057	0.359117	Etv1
ENSMUSG00000004207	9660.23	-0.0114413	0.0680482	-0.168135	0.866477	0.955553	Psap
ENSMUSG00000004221	416.463	0.540235	0.226946	2.38045	0.0172913	0.154166	Ikbkg
ENSMUSG00000004233	97.7487	-0.158966	0.192987	-0.823711	0.410104	0.739491	Wars2
ENSMUSG00000004263	2080.03	-0.422687	0.151493	-2.79014	0.0052685	0.0752264	Atn1
ENSMUSG00000004264	2654.99	0.0286406	0.0676654	0.423269	0.672099	0.879321	Phb2
ENSMUSG00000004267	56.2485	0.280602	0.308459	0.90969	0.362986	0.703794	Eno2
ENSMUSG00000004268	860.736	-0.0746174	0.103291	-0.722401	0.470048	0.77988	Emg1
ENSMUSG00000004270	479.985	0.0982953	0.165489	0.593968	0.552533	0.825422	Lpcat3
ENSMUSG00000004285	576.182	0.035192	0.120435	0.292207	0.770128	0.918185	Atp6v1f
ENSMUSG00000004317	511.864	0.317899	0.20189	1.57461	0.115346	0.421353	Clcn5
ENSMUSG00000004319	437.279	0.156028	0.148912	1.04779	0.294736	0.643013	Clcn3
ENSMUSG00000004356	1098.85	0.323682	0.127806	2.53261	0.0113218	0.119387	Utp20
ENSMUSG00000004364	1789.25	-0.0719656	0.0643234	-1.11881	0.263221	0.616123	Cul3
ENSMUSG00000004371	112.444	-0.776201	0.565983	-1.37142	0.170244	0.507049	Il11
ENSMUSG00000004383	389.799	0.106088	0.160986	0.658988	0.509903	0.801182	Large1
ENSMUSG00000004393	688.134	0.0379349	0.0736005	0.515416	0.606262	0.849914	Ddx56
ENSMUSG00000004394	587.216	0.107951	0.0819894	1.31664	0.187958	0.528399	Tmed4
ENSMUSG00000004446	494.76	0.197654	0.122512	1.61335	0.106669	0.408454	Bid
ENSMUSG00000004451	622.871	-0.0457587	0.0903979	-0.506193	0.612721	0.852583	Ralb
ENSMUSG00000004455	2975.85	-0.0197079	0.071824	-0.274391	0.783784	0.92334	Ppp1cc
ENSMUSG00000004460	1048.5	-0.0077898	0.070588	-0.110356	0.912127	0.968928	Dnajb11
ENSMUSG00000004462	33.0727	0.262145	0.639141	0.410152	0.681695		Tbccd1
ENSMUSG00000004500	69.6032	-0.355438	0.225764	-1.57438	0.115399	0.421353	Zfp324
ENSMUSG00000004508	120.209	0.266239	0.229665	1.15925	0.246354	0.598076	Gab2
ENSMUSG00000004530	3063	-0.571882	0.222063	-2.57531	0.010015	0.11114	Coro1c
ENSMUSG00000004535	1925.03	0.120727	0.0669199	1.80405	0.0712235	0.328583	Tax1bp1
ENSMUSG00000004540	7.60244	0.0706514	0.646936	0.109209	0.913036		Psg17
ENSMUSG00000004558	38.7759	-0.0506688	0.323481	-0.156636	0.875532		Ndrg2
ENSMUSG00000004561	81.2598	0.0259311	0.293666	0.0883014	0.929637	0.97485	Mettl17
ENSMUSG00000004562	1685.85	-0.745054	0.145957	-5.10462	3.31464e-07	6.38929e-05	Arhgef40
ENSMUSG00000004565	109.239	0.822044	0.293099	2.80467	0.00503685	0.0730083	Pnpla6
ENSMUSG00000004567	388.782	-0.182772	0.131624	-1.38859	0.164956	0.498097	Mcoln1
ENSMUSG00000004568	433.112	0.237699	0.167217	1.4215	0.155171	0.48321	Arhgef18
ENSMUSG00000004591	1568.68	0.085928	0.119748	0.717573	0.473021	0.781232	Pkn2
ENSMUSG00000004610	367.416	-0.0214815	0.151492	-0.1418	0.887238	0.961699	Etfb
ENSMUSG00000004626	169.781	-0.407094	0.655224	-0.621306	0.534398	0.816114	Stxbp2
ENSMUSG00000004631	356.426	0.0624017	0.121147	0.51509	0.60649	0.850086	Sgce
ENSMUSG00000004637	125.852	0.0686535	0.163535	0.41981	0.674624	0.879593	Wwox
ENSMUSG00000004642	1251.94	0.011797	0.0806284	0.146313	0.883674	0.960261	Slbp
ENSMUSG00000004651	5.12795	0.97398	0.855612	1.13834	0.254977		Tyr
ENSMUSG00000004655	1445.05	-0.0711608	0.177475	-0.400962	0.688448	0.886826	Aqp1
ENSMUSG00000004661	57.6877	-0.585449	0.526736	-1.11147	0.266367	0.620109	Arid3b
ENSMUSG00000004665	4123.38	0.340139	0.0970781	3.50377	0.000458728	0.0158473	Cnn2
ENSMUSG00000004667	777.385	-0.0757138	0.0823746	-0.91914	0.358022	0.699171	Polr2e
ENSMUSG00000004677	1074.01	-0.028032	0.130986	-0.214008	0.830541	0.941054	Myo9b
ENSMUSG00000004707	18.0759	0.157327	0.396709	0.39658	0.691677		Ly9
ENSMUSG00000004748	26.6277	-0.0101013	0.407815	-0.0247693	0.980239		Mtfp1
ENSMUSG00000004768	486.98	0.0458528	0.120034	0.381997	0.702463	0.892621	Rab23
ENSMUSG00000004771	832.194	-0.149509	0.0836162	-1.78804	0.073769	0.334323	Rab11a
ENSMUSG00000004788	366.212	0.0160673	0.101195	0.158775	0.873846	0.957791	Eif2b2
ENSMUSG00000004789	1500.6	0.0323342	0.0590958	0.547149	0.584276	0.840614	Dlst
ENSMUSG00000004798	373.02	-0.258298	0.135625	-1.9045	0.0568453	0.290496	Ulk2
ENSMUSG00000004815	165.357	-0.13355	0.257335	-0.518975	0.603778	0.849149	Dgkq
ENSMUSG00000004843	394.862	-0.319527	0.159993	-1.99713	0.0458108	0.26287	Chmp2b
ENSMUSG00000004846	2078.06	-0.0302234	0.0886469	-0.340941	0.733148	0.905606	Plod3
ENSMUSG00000004849	1881.11	0.00591299	0.0745128	0.0793555	0.93675	0.977875	Ap1s1
ENSMUSG00000004864	31.5291	-0.247275	0.544526	-0.45411	0.64975		Mapk13
ENSMUSG00000004865	873.995	-0.0213686	0.168485	-0.126828	0.899076	0.964372	Srpk1
ENSMUSG00000004872	14.6083	-0.202694	0.5311	-0.381649	0.702722		Pax3
ENSMUSG00000004880	960.076	-0.0762094	0.133084	-0.572643	0.566887	0.832088	Lbr
ENSMUSG00000004885	117.393	-0.146486	0.212544	-0.689206	0.490694	0.790379	Crabp2
ENSMUSG00000004891	818.733	0.30757	0.207157	1.48472	0.137619	0.458476	Nes
ENSMUSG00000004895	768.016	-0.0670077	0.107003	-0.62622	0.531171	0.814287	Prcc
ENSMUSG00000004896	125.681	-0.15864	0.266332	-0.595647	0.551411	0.824399	Rrnad1
ENSMUSG00000004897	7587.05	-0.0514513	0.0776512	-0.662594	0.507591	0.799634	Hdgf
ENSMUSG00000004929	769.46	0.00884956	0.153075	0.057812	0.953898	0.983496	Thop1
ENSMUSG00000004931	329.064	-0.0514273	0.210278	-0.244568	0.806791	0.931317	Apba3
ENSMUSG00000004934	350.647	-0.101255	0.129341	-0.782852	0.433714	0.756997	Pias4
ENSMUSG00000004936	1369.09	0.0836168	0.0904826	0.924119	0.355424	0.697063	Map2k1
ENSMUSG00000004937	385.08	-0.000741014	0.230648	-0.00321274	0.997437	0.99992	Sgta
ENSMUSG00000004945	252.713	-0.0472359	0.13346	-0.353934	0.723388	0.901476	Tmem242
ENSMUSG00000004947	323.223	0.122334	0.118638	1.03115	0.302471	0.649413	Dtx2
ENSMUSG00000004951	369.73	0.433038	0.285146	1.51865	0.128849	0.445268	Hspb1
ENSMUSG00000004952	196.025	0.123635	0.216835	0.570179	0.568557	0.832814	Rasa4
ENSMUSG00000004980	8489.45	-0.100986	0.101896	-0.991073	0.32165	0.667829	Hnrnpa2b1
ENSMUSG00000004994	97.732	-0.873481	0.399286	-2.18761	0.0286984	0.206414	Ccdc130
ENSMUSG00000004996	373.219	0.0128412	0.117755	0.10905	0.913163	0.969001	Mri1
ENSMUSG00000005034	1246.62	-0.164192	0.0855656	-1.9189	0.0549967	0.285023	Prkacb
ENSMUSG00000005043	205.027	-0.131002	0.138488	-0.94594	0.344179	0.687922	Sgsh
ENSMUSG00000005045	19.7729	1.01842	0.697105	1.46093	0.144035		Chd5
ENSMUSG00000005054	722.16	-0.163718	0.0981291	-1.66839	0.0952384	0.384223	Cstb
ENSMUSG00000005057	48.6601	-0.177907	0.331864	-0.536083	0.591901		Sh2b2
ENSMUSG00000005069	815.427	0.0926937	0.116626	0.794797	0.426731	0.751615	Pex5
ENSMUSG00000005078	196.061	0.137261	0.19418	0.706876	0.479644	0.784191	Jkamp
ENSMUSG00000005087	5833.93	-0.229663	0.0748386	-3.06877	0.00214941	0.0435469	Cd44
ENSMUSG00000005102	383.409	0.0978808	0.100117	0.977667	0.328239	0.674391	Eif2ak4
ENSMUSG00000005103	3447.08	0.175053	0.145572	1.20252	0.229162	0.580006	Wdr1
ENSMUSG00000005124	519.755	0.522591	0.134756	3.87806	0.000105291	0.00570111	Ccn4
ENSMUSG00000005125	634.75	0.126262	0.197867	0.638115	0.523399	0.809064	Ndrg1
ENSMUSG00000005142	553.842	0.0461129	0.0861083	0.535522	0.592289	0.84395	Man2b1
ENSMUSG00000005148	240.517	0.591265	0.187412	3.15489	0.00160561	0.0375604	Klf5
ENSMUSG00000005150	111.323	-0.28712	0.1931	-1.48689	0.137043	0.458141	Wdr83
ENSMUSG00000005161	2529.77	-0.164145	0.0822078	-1.99671	0.0458563	0.262917	Prdx2
ENSMUSG00000005198	2547.85	0.0939544	0.115052	0.816626	0.414142	0.743576	Polr2a
ENSMUSG00000005204	1165.67	-0.142796	0.163439	-0.873697	0.382283	0.715714	Senp3
ENSMUSG00000005225	135.009	-0.242976	0.193263	-1.25723	0.208669	0.556857	Plekha8
ENSMUSG00000005233	341.274	-0.202641	0.115763	-1.75048	0.0800354	0.348878	Spc25
ENSMUSG00000005262	677.536	0.137713	0.130185	1.05783	0.290135	0.639743	Ufd1
ENSMUSG00000005267	60.271	-0.492708	0.247739	-1.98882	0.0467215	0.265665	Zfp287
ENSMUSG00000005268	16.4145	1.33374	0.594299	2.24423	0.0248179		Prlr
ENSMUSG00000005299	787.771	0.069554	0.101675	0.684081	0.493924	0.792746	Letm1
ENSMUSG00000005312	2584.13	0.213989	0.0676873	3.16144	0.00156993	0.0369048	Ubqln1
ENSMUSG00000005338	5.27122	1.16506	0.777832	1.49784	0.134176		Cadm3
ENSMUSG00000005354	1458.65	0.10155	0.06065	1.67436	0.0940596	0.38138	Txn2
ENSMUSG00000005360	12.5861	-0.506719	0.73773	-0.686862	0.49217		Slc1a3
ENSMUSG00000005362	194.921	0.119128	0.181851	0.655084	0.512414	0.802175	Crbn
ENSMUSG00000005370	981.17	-0.115791	0.0755403	-1.53284	0.125316	0.439608	Msh6
ENSMUSG00000005371	748.72	0.0845635	0.100402	0.842249	0.399648	0.73115	Fbxo11
ENSMUSG00000005374	482.527	0.0297125	0.104969	0.283059	0.777131	0.920422	Tbl2
ENSMUSG00000005378	328.927	0.285776	0.144681	1.97521	0.0482444	0.268996	Bud23
ENSMUSG00000005397	7757	0.119643	0.11949	1.00128	0.316692	0.663636	Nid1
ENSMUSG00000005410	135.514	-0.40719	0.246685	-1.65065	0.0988105	0.391424	Mcm5
ENSMUSG00000005413	1650.26	0.402563	0.151025	2.66555	0.00768634	0.094491	Hmox1
ENSMUSG00000005417	4923.04	0.151205	0.0851806	1.77511	0.07588	0.338736	Mprip
ENSMUSG00000005442	1995.73	-0.251382	0.0934923	-2.6888	0.00717093	0.0914199	Cic
ENSMUSG00000005447	251.684	-0.282849	0.144127	-1.9625	0.0497039	0.272603	Pafah1b3
ENSMUSG00000005465	13.5251	0.297467	0.478668	0.621447	0.534305		Il27ra
ENSMUSG00000005469	1248.9	0.00478325	0.0701642	0.0681722	0.945649	0.981256	Prkaca
ENSMUSG00000005470	680.058	0.0241218	0.089415	0.269773	0.787335	0.92445	Asf1b
ENSMUSG00000005481	1797.7	0.184638	0.064552	2.86031	0.00423233	0.0652659	Ddx39
ENSMUSG00000005483	686.806	-0.0756742	0.0822416	-0.920146	0.357497	0.698944	Dnajb1
ENSMUSG00000005493	16.6511	-0.218177	0.483581	-0.451169	0.651868		Msh4
ENSMUSG00000005501	391.745	-0.0044869	0.126617	-0.0354367	0.971732	0.989493	Usp40
ENSMUSG00000005505	209.149	-0.125684	0.136648	-0.919763	0.357697	0.698944	Kbtbd4
ENSMUSG00000005506	1945.18	0.0920139	0.154527	0.595457	0.551538	0.824399	Celf1
ENSMUSG00000005510	484.633	-0.137571	0.124311	-1.10666	0.26844	0.621963	Ndufs3
ENSMUSG00000005514	1525.76	0.196311	0.100786	1.94779	0.0514397	0.276188	Por
ENSMUSG00000005533	740.894	0.249006	0.0877547	2.83753	0.00454645	0.0681473	Igf1r
ENSMUSG00000005534	289.129	0.0288443	0.130773	0.220567	0.825429	0.939695	Insr
ENSMUSG00000005566	3350.44	0.0169357	0.0775704	0.218327	0.827174	0.939695	Trim28
ENSMUSG00000005575	1474.51	-0.00584226	0.0856398	-0.0682189	0.945611	0.981256	Ube2m
ENSMUSG00000005580	23.8141	0.0654687	0.405543	0.161435	0.871751		Adcy9
ENSMUSG00000005583	32.8914	1.04133	1.85604	0.561048	0.574765		Mef2c
ENSMUSG00000005609	680.365	0.226854	0.0814767	2.78428	0.0053646	0.075875	Ctr9
ENSMUSG00000005610	14845.9	-0.0185728	0.0591024	-0.314247	0.753333	0.913663	Eif4g2
ENSMUSG00000005611	9.28187	1.11202	0.872186	1.27498	0.202317		Mrvi1
ENSMUSG00000005615	514.432	0.194592	0.128516	1.51415	0.129988	0.447438	Pcyt1a
ENSMUSG00000005621	376.388	0.217566	0.196462	1.10742	0.268112	0.621855	Zfp592
ENSMUSG00000005625	1778.2	0.017648	0.0631474	0.279473	0.779882	0.921726	Psmd4
ENSMUSG00000005656	636.171	-0.0552586	0.0884499	-0.624744	0.532139	0.814629	Snx6
ENSMUSG00000005667	1346.96	0.284641	0.0991382	2.87115	0.00408979	0.0640439	Mthfd2
ENSMUSG00000005674	212.227	-0.186781	0.207331	-0.900883	0.367651	0.705883	Tomm40l
ENSMUSG00000005681	10.2037	0.0817758	0.520664	0.157061	0.875197		Apoa2
ENSMUSG00000005682	62.9303	-0.821406	1.01108	-0.812405	0.416559	0.744553	Pan2
ENSMUSG00000005683	3451.89	0.128998	0.0509013	2.53427	0.011268	0.1191	Cs
ENSMUSG00000005686	166.799	0.854866	0.228974	3.73347	0.00018886	0.00831158	Ampd3
ENSMUSG00000005687	760.631	-0.0821871	0.0939037	-0.875228	0.38145	0.714978	Bcas2
ENSMUSG00000005698	1087.87	0.0643073	0.0950028	0.676899	0.49847	0.795538	Ctcf
ENSMUSG00000005699	28.1048	-0.267482	0.784736	-0.340856	0.733212		Pard6a
ENSMUSG00000005718	202.88	-0.0855284	0.119935	-0.713121	0.475771	0.782238	Tfap4
ENSMUSG00000005732	2711.67	0.0559369	0.0750176	0.74565	0.455879	0.770294	Ranbp1
ENSMUSG00000005774	163.044	-0.159274	0.16113	-0.988478	0.322919	0.669022	Rfx5
ENSMUSG00000005779	2473.3	0.147237	0.112095	1.31351	0.189012	0.529753	Psmb4
ENSMUSG00000005802	2269.79	-0.076888	0.131768	-0.58351	0.55955	0.828282	Slc30a4
ENSMUSG00000005803	181.996	-0.106082	0.302714	-0.350436	0.726011	0.9022	Sqor
ENSMUSG00000005804	348.594	-0.0235062	0.101948	-0.23057	0.817648	0.935926	Bloc1s6
ENSMUSG00000005813	1127.51	0.0783777	0.0774252	1.0123	0.311394	0.657584	Metap1
ENSMUSG00000005823	224.679	-0.0323077	0.155667	-0.207544	0.835585	0.943349	Gpr108
ENSMUSG00000005836	130.24	0.0456713	0.242629	0.188235	0.850693	0.949197	Gata6
ENSMUSG00000005846	2170.53	0.122579	0.0636313	1.9264	0.0540545	0.282345	Rsl1d1
ENSMUSG00000005871	897.828	0.256068	0.174246	1.46957	0.141677	0.46445	Apc
ENSMUSG00000005873	1033.82	0.196186	0.0751309	2.61125	0.00902119	0.104755	Reep5
ENSMUSG00000005881	757.542	-0.0267814	0.151206	-0.177118	0.859415	0.95305	Ergic3
ENSMUSG00000005882	356.446	-0.099525	0.32383	-0.307337	0.758587	0.915091	Uqcc1
ENSMUSG00000005886	305.256	-0.0156746	0.198443	-0.0789883	0.937042	0.977875	Ncoa2
ENSMUSG00000005893	609.343	-0.225975	0.129861	-1.74012	0.0818372	0.353645	Nr2c2
ENSMUSG00000005897	131.809	0.105531	0.148816	0.70914	0.478238	0.782955	Nr2c1
ENSMUSG00000005899	466.307	0.173364	0.120077	1.44378	0.148801	0.473003	Smpd4
ENSMUSG00000005907	106.869	-0.314148	0.282865	-1.11059	0.266743	0.620384	Pex1
ENSMUSG00000005936	752.283	0.271898	0.114565	2.37331	0.0176294	0.156313	Kctd20
ENSMUSG00000005949	107.842	0.104812	0.18779	0.558135	0.576753	0.83736	Ctns
ENSMUSG00000005950	24.617	0.673646	0.389775	1.7283	0.0839353		P2rx5
ENSMUSG00000005951	13.5489	0.126109	0.594707	0.212053	0.832066		Shpk
ENSMUSG00000005958	96.2356	-0.549956	0.280237	-1.96247	0.0497078	0.272603	Ephb3
ENSMUSG00000005968	72.3152	0.708665	0.241286	2.93704	0.00331361	0.0568267	Tuft1
ENSMUSG00000005973	1489.07	-0.146434	0.0783465	-1.86906	0.0616151	0.304225	Rcn1
ENSMUSG00000005981	835.319	0.195476	0.0965757	2.02407	0.0429625	0.253486	Trap1
ENSMUSG00000005982	274.713	0.0142528	0.113869	0.125169	0.90039	0.964493	Naa60
ENSMUSG00000005983	20.5947	-0.392431	0.486111	-0.807286	0.419502		1700037C18Rik
ENSMUSG00000005986	14.6868	-0.569058	0.716809	-0.793876	0.427268		Ankrd13d
ENSMUSG00000006005	2829.16	0.264578	0.103162	2.56468	0.0103271	0.113051	Tpr
ENSMUSG00000006010	270.16	0.337291	0.157958	2.13532	0.0327347	0.220936	Odr4
ENSMUSG00000006019	258.175	-0.0752554	0.260263	-0.289152	0.772465	0.91864	Dhx34
ENSMUSG00000006021	60.4231	-0.135614	0.222187	-0.610361	0.541622	0.820247	Kptn
ENSMUSG00000006024	1102.01	0.0437832	0.0721872	0.606523	0.544167	0.821021	Napa
ENSMUSG00000006050	386.526	-0.0646074	0.0934492	-0.691364	0.489337	0.789111	Sra1
ENSMUSG00000006057	850.468	0.058152	0.0894477	0.650122	0.515613	0.803733	Atp5g1
ENSMUSG00000006058	397.568	0.0373892	0.157683	0.237115	0.812567	0.934773	Snf8
ENSMUSG00000006095	423.991	-0.0562838	0.13095	-0.429811	0.667333	0.878295	Tbcb
ENSMUSG00000006127	123.885	0.341399	0.155379	2.1972	0.0280063	0.203126	Inpp5k
ENSMUSG00000006134	705.949	-0.172571	0.103624	-1.66536	0.0958406	0.385342	Crkl
ENSMUSG00000006169	1729.16	0.0636039	0.0721549	0.881491	0.378052	0.714452	Clint1
ENSMUSG00000006191	153.896	0.0350359	0.146611	0.238972	0.811127	0.933785	Cdkal1
ENSMUSG00000006205	3353.07	0.795068	0.134365	5.91721	3.27442e-09	1.05196e-06	Htra1
ENSMUSG00000006215	368.251	-0.0781063	0.114912	-0.679706	0.496691	0.794931	Zbtb17
ENSMUSG00000006219	783.015	-0.0816049	0.150476	-0.542312	0.587604	0.841903	Fblim1
ENSMUSG00000006262	708.661	0.333336	0.1176	2.8345	0.0045897	0.0686887	Mob1b
ENSMUSG00000006273	1403.93	0.062971	0.0867895	0.72556	0.468108	0.77859	Atp6v1b2
ENSMUSG00000006276	168.133	-0.0915917	0.23129	-0.396004	0.692102	0.888568	Eps15l1
ENSMUSG00000006281	166.856	0.0273523	0.311388	0.0878401	0.930004	0.975022	Tep1
ENSMUSG00000006288	156.117	0.123614	0.149581	0.8264	0.408577	0.738291	Ttc5
ENSMUSG00000006289	189.062	-0.158104	0.208894	-0.756862	0.449132	0.766288	Osgep
ENSMUSG00000006299	1229.19	-0.107742	0.0985819	-1.09292	0.274431	0.628258	Aamp
ENSMUSG00000006301	638.896	-0.0336295	0.136626	-0.246143	0.805571	0.931317	Tmbim1
ENSMUSG00000006304	3026.25	0.019882	0.0600121	0.331301	0.740417	0.908062	Arpc2
ENSMUSG00000006307	601.131	0.28522	0.129966	2.19458	0.0281939	0.203545	Kmt2b
ENSMUSG00000006315	235.722	-0.169509	0.159864	-1.06033	0.288994	0.638542	Tmem147
ENSMUSG00000006333	6298.17	-0.0732101	0.10173	-0.719652	0.471739	0.780671	Rps9
ENSMUSG00000006335	119.168	0.0330538	0.204039	0.161997	0.871308	0.957285	Tfpt
ENSMUSG00000006356	151.975	-0.202836	0.213947	-0.948065	0.343096	0.68727	Crip2
ENSMUSG00000006360	12.7168	-0.371948	0.794378	-0.468226	0.639623		Crip1
ENSMUSG00000006369	747.589	-0.34025	0.0962678	-3.53441	0.000408681	0.0144281	Fbln1
ENSMUSG00000006373	1977.45	0.295428	0.0772873	3.82247	0.000132121	0.0066669	Pgrmc1
ENSMUSG00000006378	268.44	-0.396353	0.176769	-2.24221	0.024948	0.189287	Gcat
ENSMUSG00000006386	6.08437	0.524315	0.671895	0.780352	0.435183		Tek
ENSMUSG00000006390	586.71	-0.112268	0.0828987	-1.35428	0.175646	0.512992	Elovl1
ENSMUSG00000006392	336.716	0.151992	0.109119	1.3929	0.163649	0.495835	Med8
ENSMUSG00000006395	54.7471	-0.577376	0.235849	-2.44807	0.0143624	0.139138	Hyi
ENSMUSG00000006398	1627.1	0.0968581	0.0929543	1.042	0.297413	0.644585	Cdc20
ENSMUSG00000006403	130.527	0.401711	0.940379	0.42718	0.669248	0.878899	Adamts4
ENSMUSG00000006412	675.711	0.107793	0.0857457	1.25712	0.208708	0.556857	Pfdn2
ENSMUSG00000006418	386.906	0.157071	0.101362	1.54961	0.121235	0.432261	Rnf114
ENSMUSG00000006423	509.489	-0.0131803	0.121323	-0.108638	0.91349	0.969001	C330007P06Rik
ENSMUSG00000006435	25.0658	0.00439705	0.391224	0.0112392	0.991033		Neurl1a
ENSMUSG00000006442	2078.91	0.217247	0.0733238	2.96285	0.00304809	0.0543022	Srm
ENSMUSG00000006445	2195.86	0.905981	0.16041	5.64791	1.62412e-08	4.60389e-06	Epha2
ENSMUSG00000006456	889.286	-0.104885	0.0815281	-1.28649	0.198273	0.541961	Rbm14
ENSMUSG00000006457	10.0341	0.249315	0.583219	0.427482	0.669029		Actn3
ENSMUSG00000006463	42.0616	-0.370711	0.278083	-1.33309	0.182501		Zdhhc24
ENSMUSG00000006464	34.995	0.114431	0.310918	0.36804	0.712843		Bbs1
ENSMUSG00000006471	221.708	0.0237357	0.205604	0.115444	0.908094	0.96701	Ndor1
ENSMUSG00000006476	259.723	-0.329776	0.161963	-2.03612	0.0417384	0.249864	Nsmf
ENSMUSG00000006494	1034.52	-0.169466	0.0827809	-2.04716	0.0406426	0.246848	Pdk1
ENSMUSG00000006498	7230.88	0.0732749	0.146358	0.500654	0.616615	0.853726	Ptbp1
ENSMUSG00000006517	191.498	-0.369068	0.17317	-2.13125	0.0330685	0.221791	Mvd
ENSMUSG00000006519	625.472	0.0537225	0.112656	0.476873	0.633453	0.862655	Cyba
ENSMUSG00000006526	140.189	0.0999901	0.211515	0.472732	0.636404	0.864018	Stimate
ENSMUSG00000006527	86.4148	0.307298	0.247094	1.24365	0.213628	0.563324	Sfmbt1
ENSMUSG00000006576	60.9409	-0.212447	0.35815	-0.593178	0.553062	0.825565	Slc4a3
ENSMUSG00000006585	986.494	-0.0605395	0.0970812	-0.623597	0.532892	0.81537	Cdt1
ENSMUSG00000006586	86.9626	-0.358281	0.305323	-1.17345	0.240617	0.591906	Runx1t1
ENSMUSG00000006589	1596.96	-0.0851934	0.0981998	-0.867552	0.38564	0.718073	Aprt
ENSMUSG00000006599	1058.82	0.266601	0.131187	2.03221	0.0421319	0.251124	Gtf2h1
ENSMUSG00000006611	67.4539	0.133009	0.382709	0.347547	0.728181	0.903548	Hfe
ENSMUSG00000006641	120.016	0.218794	0.521228	0.419767	0.674655	0.879593	Slc5a6
ENSMUSG00000006673	1139.59	-0.0475171	0.112505	-0.422356	0.672765	0.879321	Qrich1
ENSMUSG00000006676	1428.83	-0.0641419	0.108145	-0.593108	0.553109	0.825565	Usp19
ENSMUSG00000006678	912.843	0.110348	0.11387	0.969071	0.33251	0.677204	Pola1
ENSMUSG00000006699	4409.77	0.114429	0.0561999	2.03611	0.0417391	0.249864	Cdc42
ENSMUSG00000006705	192.467	-0.157163	0.134618	-1.16748	0.243018	0.593814	Pknox1
ENSMUSG00000006715	361.798	0.00046549	0.134129	0.00347045	0.997231	0.99992	Gmnn
ENSMUSG00000006717	147.977	-0.00942476	0.199005	-0.0473595	0.962227	0.985278	Acot13
ENSMUSG00000006720	51.6585	0.186938	0.263758	0.708747	0.478481		Zfp184
ENSMUSG00000006728	4100.2	-0.150857	0.0766275	-1.9687	0.0489875	0.270568	Cdk4
ENSMUSG00000006731	342.001	-0.0348409	0.114617	-0.303978	0.761145	0.915354	B4galnt1
ENSMUSG00000006732	246.754	0.0558178	0.132565	0.421059	0.673712	0.879593	Mettl1
ENSMUSG00000006736	714.616	0.109991	0.0829161	1.32653	0.184664	0.525313	Tspan31
ENSMUSG00000006740	3037.05	0.238488	0.107105	2.22667	0.0259693	0.193978	Kif5b
ENSMUSG00000006763	61.9667	0.315285	0.291928	1.08001	0.280138	0.631868	Saal1
ENSMUSG00000006764	6.8206	0.48937	0.624384	0.783764	0.433179		Tph2
ENSMUSG00000006782	68.074	0.423157	0.403455	1.04883	0.294255	0.643013	Cnp
ENSMUSG00000006784	5.08426	-0.590869	0.919703	-0.642457	0.520577		Ttc25
ENSMUSG00000006800	7.91689	-0.154971	0.818049	-0.189439	0.849748		Sulf2
ENSMUSG00000006818	253.045	-0.170528	0.236391	-0.721378	0.470677	0.780252	Sod2
ENSMUSG00000006850	53.2654	-0.71244	0.244892	-2.9092	0.00362351	0.0599029	Tmco6
ENSMUSG00000006920	136.045	-0.222467	0.174983	-1.27137	0.203598	0.550121	Ezh1
ENSMUSG00000006930	25.4656	0.403056	0.387756	1.03946	0.298592		Hap1
ENSMUSG00000006931	642.269	-0.134128	0.125997	-1.06453	0.287088	0.636622	P3h4
ENSMUSG00000006932	5722	-0.0272738	0.101151	-0.269634	0.787441	0.92445	Ctnnb1
ENSMUSG00000006941	240.154	-0.262156	0.119992	-2.18477	0.0289054	0.206669	Eif1b
ENSMUSG00000006998	5775.78	0.062859	0.0482886	1.30174	0.193006	0.535154	Psmd2
ENSMUSG00000007029	4158.56	-0.0150356	0.0769993	-0.195269	0.845182	0.947401	Vars
ENSMUSG00000007035	9.01652	-0.405283	0.615074	-0.658917	0.509949		Msh5
ENSMUSG00000007036	255.656	0.214584	0.123687	1.7349	0.0827585	0.35615	Abhd16a
ENSMUSG00000007038	136.139	0.0947304	0.201275	0.470653	0.637889	0.864838	Neu1
ENSMUSG00000007039	158.781	-0.307202	0.198278	-1.54935	0.121297	0.432261	Ddah2
ENSMUSG00000007041	2509.89	-0.0534143	0.105958	-0.504111	0.614183	0.853044	Clic1
ENSMUSG00000007050	539.937	-0.17026	0.118942	-1.43145	0.152301	0.477514	Lsm2
ENSMUSG00000007080	1070.72	-0.0444754	0.0816984	-0.544385	0.586177	0.841449	Pole
ENSMUSG00000007207	89.8734	0.0459905	0.197679	0.232652	0.816031	0.934774	Stx1a
ENSMUSG00000007338	441.29	0.127258	0.101581	1.25278	0.210286	0.558483	Mrpl49
ENSMUSG00000007379	105.059	-0.00622558	0.172848	-0.0360177	0.971268	0.98923	Dennd2c
ENSMUSG00000007411	272.885	0.181171	0.124155	1.45923	0.144501	0.467339	Mark3
ENSMUSG00000007415	912.56	0.0108418	0.09993	0.108494	0.913604	0.969001	Gatad1
ENSMUSG00000007458	1537.01	0.302509	0.0731169	4.13734	3.51363e-05	0.00289439	M6pr
ENSMUSG00000007476	343.642	0.0383646	0.0981669	0.39081	0.695938	0.890066	Lrrc8a
ENSMUSG00000007564	2930.89	0.0796867	0.0681611	1.16909	0.242366	0.593814	Ppp2r1a
ENSMUSG00000007570	198.214	-0.76928	0.255426	-3.01176	0.00259739	0.0490857	Fance
ENSMUSG00000007589	154.617	-0.0258822	0.193247	-0.133933	0.893455	0.963996	Tinf2
ENSMUSG00000007603	238.39	-0.125388	0.172644	-0.72628	0.467667	0.778308	Dus3l
ENSMUSG00000007610	290.221	0.116288	0.179337	0.64843	0.516707	0.804267	Gtpbp3
ENSMUSG00000007613	329.641	-0.259119	0.163863	-1.58131	0.113808	0.419135	Tgfbr1
ENSMUSG00000007617	267.58	-0.119788	0.119664	-1.00104	0.316807	0.663636	Homer1
ENSMUSG00000007646	69.8528	-0.55634	0.260016	-2.13964	0.0323838	0.219799	Rad51c
ENSMUSG00000007655	2326.62	-0.406671	0.114896	-3.53947	0.000400936	0.0143119	Cav1
ENSMUSG00000007656	1218.22	0.0400675	0.109519	0.365849	0.714478	0.897671	Arpp19
ENSMUSG00000007659	811.47	0.193951	0.109988	1.76339	0.0778352	0.343474	Bcl2l1
ENSMUSG00000007670	2479.37	0.00637072	0.084498	0.0753949	0.9399	0.979006	Khsrp
ENSMUSG00000007682	63.3452	-1.15973	0.467361	-2.48145	0.0130848	0.131916	Dio2
ENSMUSG00000007721	1037.55	0.0105891	0.113792	0.0930564	0.925859	0.973161	Ccdc124
ENSMUSG00000007739	3482.58	0.101311	0.0540411	1.8747	0.0608345	0.302072	Cct4
ENSMUSG00000007777	71.7354	-0.245258	0.224042	-1.09469	0.273651	0.627068	0610009B22Rik
ENSMUSG00000007783	127.598	-0.627265	0.272401	-2.30272	0.0212945	0.17364	Cpt1c
ENSMUSG00000007805	1645.22	-0.618349	0.101348	-6.10128	1.05224e-09	4.40935e-07	Twist2
ENSMUSG00000007812	433.785	0.191396	0.131722	1.45303	0.146216	0.46984	Zfp655
ENSMUSG00000007815	4355.28	-0.0861818	0.10617	-0.811736	0.416943	0.744553	Rhoa
ENSMUSG00000007817	1683.44	0.00720026	0.137753	0.0522692	0.958314	0.984377	Zmiz1
ENSMUSG00000007827	187.178	-0.348113	0.216149	-1.61053	0.107283	0.409665	Ankrd26
ENSMUSG00000007833	210.13	-0.449797	0.16913	-2.65947	0.00782636	0.0956026	Aldh16a1
ENSMUSG00000007836	4900.39	-0.160024	0.106	-1.50966	0.131131	0.449126	Hnrnpa0
ENSMUSG00000007837	28.9832	0.173266	0.339223	0.510773	0.60951		Prrg2
ENSMUSG00000007850	4767.52	-0.270893	0.173437	-1.56191	0.118308	0.427479	Hnrnph1
ENSMUSG00000007867	25.841	-0.697235	0.744842	-0.936084	0.34923		Ift43
ENSMUSG00000007872	841.112	-0.312871	0.227164	-1.37729	0.168423	0.505058	Id3
ENSMUSG00000007880	1198.23	0.0562336	0.12039	0.467096	0.640431	0.866571	Arid1a
ENSMUSG00000007888	43.2397	-0.430758	0.483204	-0.891462	0.372681		Crlf1
ENSMUSG00000007891	3064.9	0.272984	0.0860349	3.17294	0.00150903	0.0358228	Ctsd
ENSMUSG00000007892	9388.79	-0.127474	0.063182	-2.01756	0.0436368	0.255822	Rplp1
ENSMUSG00000007908	16.1796	-0.061186	0.64881	-0.0943051	0.924867		Hmgcll1
ENSMUSG00000007950	514.03	-0.383991	0.104874	-3.66145	0.000250788	0.0101629	Abhd8
ENSMUSG00000007987	25.1644	-0.245295	0.360027	-0.681325	0.495666		Ift22
ENSMUSG00000007989	58.0061	0.360047	0.312151	1.15344	0.24873	0.599903	Fzd3
ENSMUSG00000008035	531.796	-0.433575	0.143242	-3.02687	0.00247102	0.0475153	Mid1ip1
ENSMUSG00000008036	565.525	-0.105181	0.124926	-0.841945	0.399819	0.731206	Ap2s1
ENSMUSG00000008090	398.871	-0.164674	0.118513	-1.3895	0.16468	0.497864	Fgfrl1
ENSMUSG00000008129	19.0285	-0.0359722	0.50741	-0.0708937	0.943482		4930432K21Rik
ENSMUSG00000008136	1064.45	0.178374	0.131512	1.35633	0.174994	0.511892	Fhl2
ENSMUSG00000008140	969.317	-0.287847	0.0705018	-4.08283	4.44903e-05	0.00332401	Emc10
ENSMUSG00000008167	88.5274	-0.229183	0.221062	-1.03674	0.299859	0.646586	Fbxw9
ENSMUSG00000008200	572.992	-0.121078	0.133484	-0.90706	0.364375	0.704483	Fnbp4
ENSMUSG00000008206	52.7273	0.396491	0.40706	0.974036	0.330039	0.676435	Cers4
ENSMUSG00000008226	135.694	0.238231	0.201227	1.18389	0.236455	0.587266	Scrn3
ENSMUSG00000008301	463.796	0.092599	0.127999	0.723435	0.469413	0.779336	Phax
ENSMUSG00000008305	435.801	0.246621	0.18356	1.34355	0.179095	0.518354	Tle1
ENSMUSG00000008318	103.802	0.602784	0.257646	2.33959	0.0193051	0.164798	Relt
ENSMUSG00000008333	534.978	-0.0517091	0.114866	-0.450171	0.652587	0.873076	Snrpb2
ENSMUSG00000008348	15227.9	0.0790281	0.156202	0.505935	0.612903	0.852583	Ubc
ENSMUSG00000008373	714.588	0.0745293	0.0800354	0.931204	0.351748	0.694731	Prpf31
ENSMUSG00000008384	256.637	-0.0547713	0.171213	-0.319902	0.749043	0.912145	Sertad1
ENSMUSG00000008393	1741.53	0.00372976	0.0891987	0.0418141	0.966647	0.98712	Carhsp1
ENSMUSG00000008398	1581.11	-0.103911	0.0838469	-1.23929	0.215238	0.56484	Elk3
ENSMUSG00000008429	307.008	-0.00251712	0.123624	-0.0203611	0.983755	0.994278	Herpud2
ENSMUSG00000008435	260.068	0.357869	0.116458	3.07295	0.00211951	0.0433713	Rdh13
ENSMUSG00000008450	785.851	0.220251	0.131031	1.68091	0.0927808	0.378747	Nutf2
ENSMUSG00000008475	2052.4	0.219886	0.0672432	3.27001	0.00107544	0.0274209	Arpc5
ENSMUSG00000008489	8.90015	1.24831	0.681574	1.83151	0.0670241		Elavl2
ENSMUSG00000008496	8.35248	-0.363304	0.557116	-0.652115	0.514327		Pou2f2
ENSMUSG00000008540	155.911	-0.273512	0.427214	-0.640223	0.522027	0.808501	Mgst1
ENSMUSG00000008575	751.14	-0.239508	0.0804084	-2.97865	0.00289524	0.0523533	Nfib
ENSMUSG00000008604	1547.15	-0.0796079	0.0911603	-0.873274	0.382514	0.715719	Ubqln4
ENSMUSG00000008668	5853.25	0.0133489	0.0986545	0.135309	0.892367	0.963996	Rps18
ENSMUSG00000008682	6450.64	-0.0744715	0.0809081	-0.920445	0.35734	0.698944	Rpl10
ENSMUSG00000008683	2555.48	-0.0644777	0.149222	-0.432093	0.665674	0.877658	Rps15a
ENSMUSG00000008690	1849.06	-0.00772859	0.0951021	-0.0812662	0.93523	0.97774	Ncaph2
ENSMUSG00000008730	1371.96	-0.243944	0.146451	-1.66571	0.095771	0.385342	Hipk1
ENSMUSG00000008734	355.069	-0.24407	0.195764	-1.24676	0.212486	0.561696	Gprc5b
ENSMUSG00000008763	1064.01	0.200412	0.219405	0.913433	0.361015	0.702071	Man1a2
ENSMUSG00000008822	29.5558	0.185184	0.323071	0.573199	0.56651		Acyp1
ENSMUSG00000008855	555.308	-0.466423	0.114467	-4.07473	4.6068e-05	0.00336366	Hdac5
ENSMUSG00000008859	613.911	-0.0428319	0.0809383	-0.529191	0.596673	0.846037	Rala
ENSMUSG00000008892	2099.26	0.071603	0.058816	1.21741	0.22345	0.573976	Vdac3
ENSMUSG00000008958	460.764	-0.215168	0.0957488	-2.24722	0.0246263	0.188864	Vps72
ENSMUSG00000008976	1011.3	-0.113774	0.198301	-0.573745	0.566141	0.832032	Gabpa
ENSMUSG00000009013	1361.28	-0.0836771	0.0966128	-0.866108	0.386431	0.718723	Dynll1
ENSMUSG00000009030	269.959	0.00187938	0.200974	0.00935136	0.992539	0.997507	Pdcl
ENSMUSG00000009035	2003.2	0.0113037	0.0896883	0.126034	0.899705	0.964477	Tmem184b
ENSMUSG00000009073	1070.94	0.102614	0.0876724	1.17042	0.241831	0.59307	Nf2
ENSMUSG00000009076	90.0864	-0.262423	0.222105	-1.18153	0.237393	0.588324	Zmat5
ENSMUSG00000009079	3864.96	-0.174141	0.0797019	-2.1849	0.0288964	0.206669	Ewsr1
ENSMUSG00000009090	883.56	0.220925	0.153604	1.43828	0.150355	0.474809	Ap1b1
ENSMUSG00000009108	15.6158	0.13843	0.543124	0.254877	0.798818		Gnat2
ENSMUSG00000009112	690.233	0.16266	0.0789612	2.06	0.0393982	0.243624	Bcl2l13
ENSMUSG00000009145	13.7739	0.326898	0.550333	0.593999	0.552513		Dqx1
ENSMUSG00000009207	396.446	0.224149	0.130196	1.72162	0.0851381	0.361003	Lnpk
ENSMUSG00000009281	9.55245	0.874905	0.704444	1.24198	0.214244		Rarres2
ENSMUSG00000009291	2007.52	0.0666061	0.095425	0.697994	0.485181	0.787763	Pttg1ip
ENSMUSG00000009293	817.67	-0.112131	0.0804054	-1.39457	0.163147	0.495427	Ube2g2
ENSMUSG00000009376	1376.74	0.0266101	0.0888406	0.299526	0.764539	0.917089	Met
ENSMUSG00000009406	280.782	-0.181096	0.111272	-1.62751	0.10363	0.402898	Elk1
ENSMUSG00000009418	712.002	-0.0926556	0.165446	-0.560035	0.575456	0.836537	Nav1
ENSMUSG00000009470	3412.75	0.300695	0.128467	2.34064	0.0192506	0.164635	Tnpo1
ENSMUSG00000009535	536.694	0.201871	0.0987512	2.04424	0.0409303	0.247172	Rnmt
ENSMUSG00000009549	396.792	-0.0655365	0.139351	-0.470297	0.638143	0.864916	Srp14
ENSMUSG00000009555	1027.91	-0.139322	0.114283	-1.21909	0.222811	0.573711	Cdk9
ENSMUSG00000009563	270.178	-0.249002	0.169766	-1.46673	0.142449	0.465673	Tor2a
ENSMUSG00000009566	405.432	0.000251638	0.131121	0.00191913	0.998469	0.99992	Fpgs
ENSMUSG00000009569	390.364	0.0468397	0.121995	0.383946	0.701018	0.891701	Mrtfb
ENSMUSG00000009575	2768.48	-0.111747	0.0804431	-1.38914	0.164789	0.498037	Cbx5
ENSMUSG00000009585	344.585	0.128889	0.116496	1.10639	0.268559	0.622056	Apobec3
ENSMUSG00000009614	28.8972	-0.461224	0.359061	-1.28453	0.198957		Sardh
ENSMUSG00000009621	326.969	0.00457271	0.125612	0.0364035	0.970961	0.989021	Vav2
ENSMUSG00000009628	5.09073	0.379002	0.840432	0.450961	0.652017		Tex15
ENSMUSG00000009630	1562	0.0343172	0.0872496	0.393323	0.694081	0.889332	Ppp2cb
ENSMUSG00000009640	201.313	-0.140422	0.14447	-0.971984	0.331059	0.677073	Dmap1
ENSMUSG00000009647	424.362	-0.145975	0.117704	-1.24019	0.214905	0.564683	Mcu
ENSMUSG00000009654	13.8978	-0.0705225	0.48821	-0.144451	0.885144		Oit3
ENSMUSG00000009681	662.934	0.102421	0.0926247	1.10577	0.268827	0.622198	Bcr
ENSMUSG00000009687	441.595	0.0729222	0.137589	0.530001	0.596111	0.845889	Fxyd5
ENSMUSG00000009731	63.2036	-0.557904	0.214107	-2.60572	0.00916813	0.105444	Kcnd1
ENSMUSG00000009739	54.0889	0.124877	0.333493	0.374453	0.708068	0.894509	Pou6f1
ENSMUSG00000009741	54.9406	-0.198711	1.27333	-0.156056	0.875989	0.958523	Ubp1
ENSMUSG00000009772	64.3726	0.475225	0.245537	1.93546	0.0529344	0.278332	Nuak2
ENSMUSG00000009828	278.16	-0.125985	0.11622	-1.08402	0.278356	0.630357	Ick
ENSMUSG00000009863	775.905	-0.159775	0.0965622	-1.65463	0.0979986	0.390133	Sdhb
ENSMUSG00000009894	420.812	-0.219147	0.164752	-1.33016	0.183464	0.523283	Snap47
ENSMUSG00000009905	246.834	0.0357483	0.122817	0.29107	0.770998	0.918377	Kdsr
ENSMUSG00000009907	708.72	0.206449	0.0957679	2.15572	0.0311057	0.2146	Vps4b
ENSMUSG00000009927	453.085	-0.0446394	0.117535	-0.379796	0.704097	0.893023	Rps25
ENSMUSG00000009995	122.924	0.118296	0.157182	0.752603	0.451689	0.768089	Taz
ENSMUSG00000010025	439.539	-0.110876	0.135079	-0.820827	0.411745	0.741341	Aldh3a2
ENSMUSG00000010045	449.635	-0.0754276	0.0953055	-0.79143	0.428693	0.753238	Tmem115
ENSMUSG00000010047	345.082	0.545485	0.209543	2.60322	0.00923534	0.105964	Hyal2
ENSMUSG00000010048	638.196	-0.0108432	0.122117	-0.0887941	0.929246	0.974787	Ifrd2
ENSMUSG00000010051	12.0934	-0.844134	0.645323	-1.30808	0.190846		Hyal1
ENSMUSG00000010054	109.004	-0.0222241	0.166895	-0.133162	0.894065	0.963996	Tusc2
ENSMUSG00000010057	95.4899	-0.26389	0.247947	-1.0643	0.287193	0.636622	Nprl2
ENSMUSG00000010067	1013.97	0.259048	0.125414	2.06554	0.0388715	0.24164	Rassf1
ENSMUSG00000010095	1575.58	0.234723	0.136136	1.72418	0.0846758	0.360011	Slc3a2
ENSMUSG00000010097	1323.67	-0.063713	0.0838367	-0.759966	0.447275	0.76489	Nxf1
ENSMUSG00000010110	419.9	0.00909045	0.167282	0.0543419	0.956663	0.983954	Stx5a
ENSMUSG00000010154	117.679	-0.0781691	0.268637	-0.290984	0.771063	0.918377	Spire2
ENSMUSG00000010205	1609.28	0.0150799	0.0921715	0.163607	0.870041	0.957025	Raver1
ENSMUSG00000010277	3055.44	0.115641	0.125079	0.924539	0.355206	0.697063	2610507B11Rik
ENSMUSG00000010290	200.744	-0.125393	0.166461	-0.753287	0.451278	0.767783	AI597479
ENSMUSG00000010307	85.1854	-0.0502607	0.194174	-0.258844	0.795756	0.927233	Tmem86a
ENSMUSG00000010311	6.70097	1.73427	0.842085	2.0595	0.0394467		Optc
ENSMUSG00000010358	108.864	-0.0770607	0.189419	-0.406827	0.684135	0.884228	Ifi35
ENSMUSG00000010362	16.0124	0.189542	0.447439	0.423615	0.671846		Rdm1
ENSMUSG00000010376	397.976	0.0413543	0.137318	0.301158	0.763294	0.916485	Nedd8
ENSMUSG00000010392	544.426	0.0631664	0.203255	0.310775	0.755972	0.915091	Gosr1
ENSMUSG00000010406	46.0918	-0.138955	0.503523	-0.275965	0.782575		Mrpl52
ENSMUSG00000010453	759.217	-0.103332	0.169314	-0.610298	0.541664	0.820247	Kansl3
ENSMUSG00000010461	39.8499	-0.130062	0.324621	-0.400658	0.688672		Eya4
ENSMUSG00000010476	120.686	-0.0871054	0.223417	-0.389878	0.696627	0.890463	Ebf3
ENSMUSG00000010517	754.813	0.257721	0.143481	1.79621	0.072461	0.33136	Faf1
ENSMUSG00000010538	7.34396	0.462339	0.601087	0.769171	0.441792		Tsacc
ENSMUSG00000010554	688.906	0.209623	0.139563	1.502	0.133098	0.452647	Mettl16
ENSMUSG00000010601	34.8851	0.562345	0.327279	1.71824	0.085752		Apol7a
ENSMUSG00000010607	56.31	-0.237221	0.229734	-1.03259	0.301796	0.648604	Pigyl
ENSMUSG00000010608	1785.26	0.0661198	0.0916077	0.721772	0.470435	0.779985	Rbm25
ENSMUSG00000010609	80.242	-0.25553	0.4079	-0.626451	0.531019	0.814287	Psen2
ENSMUSG00000010660	161.162	-0.465333	0.207301	-2.24471	0.0247865	0.189075	Plcd1
ENSMUSG00000010663	1128.63	-0.214831	0.117044	-1.83548	0.0664348	0.316783	Fads1
ENSMUSG00000010721	32.7806	-0.0465619	0.33531	-0.138863	0.889559		Lmbr1
ENSMUSG00000010751	392.702	0.277588	0.135718	2.04533	0.040822	0.247026	Tnfrsf22
ENSMUSG00000010755	756.742	-0.162178	0.155684	-1.04171	0.297546	0.644727	Cars
ENSMUSG00000010830	172.813	0.00853512	0.139803	0.061051	0.951319	0.982966	Kdelr3
ENSMUSG00000010911	112.699	-0.144807	0.237454	-0.609833	0.541973	0.820247	Apip
ENSMUSG00000010914	256.149	0.0864874	0.10656	0.811628	0.417005	0.744553	Pdhx
ENSMUSG00000010936	572.252	0.0215082	0.0864003	0.248936	0.80341	0.930502	Vac14
ENSMUSG00000011096	1020.69	-0.279217	0.105249	-2.65291	0.00798016	0.0967457	Akt1s1
ENSMUSG00000011114	1203.21	-0.0125809	0.0839502	-0.149861	0.880874	0.960178	Tbrg1
ENSMUSG00000011148	23.7401	0.488483	0.410537	1.18987	0.234099		Adssl1
ENSMUSG00000011158	267.668	-0.074232	0.137796	-0.53871	0.590087	0.843813	Brf1
ENSMUSG00000011171	10.465	0.872614	0.794803	1.0979	0.272248		Vipr2
ENSMUSG00000011179	4757.28	0.0176775	0.107484	0.164467	0.869364	0.956936	Odc1
ENSMUSG00000011254	244.765	-0.0801033	0.152723	-0.524501	0.59993	0.847474	Thg1l
ENSMUSG00000011256	1653.23	0.25562	0.139037	1.83851	0.0659878	0.316125	Adam19
ENSMUSG00000011257	4097.65	-0.0755803	0.0609217	-1.24061	0.214748	0.564683	Pabpc4
ENSMUSG00000011267	10.6502	0.242882	0.532705	0.455941	0.648433		Zfp296
ENSMUSG00000011306	373.943	0.119364	0.101448	1.17661	0.239353	0.591131	Sugp1
ENSMUSG00000011382	13.5659	0.150558	0.421306	0.35736	0.720823		Dhdh
ENSMUSG00000011427	69.3962	0.130921	0.206106	0.635213	0.525289	0.810687	Zfp790
ENSMUSG00000011658	22.6251	-0.948953	0.939556	-1.01	0.312495		Fuz
ENSMUSG00000011751	15.6324	0.38905	0.592305	0.65684	0.511284		Sptbn4
ENSMUSG00000011752	10197.9	0.0894012	0.0850193	1.05154	0.293011	0.642205	Pgam1
ENSMUSG00000011831	1019.85	0.0834129	0.100713	0.828225	0.407543	0.737506	Evi5
ENSMUSG00000011832	164.024	-0.179945	0.194547	-0.924944	0.354995	0.696974	Evi5l
ENSMUSG00000011837	365.7	-0.16068	0.13047	-1.23154	0.21812	0.568793	Snapc2
ENSMUSG00000011877	1595.27	0.104178	0.0900181	1.1573	0.24715	0.598802	Git1
ENSMUSG00000011884	530.208	0.00419088	0.0801035	0.0523183	0.958275	0.984377	Gltp
ENSMUSG00000011958	1510.79	0.0168744	0.101018	0.167043	0.867336	0.955686	Bnip2
ENSMUSG00000011960	631.776	-0.0254815	0.160554	-0.15871	0.873897	0.957791	Ccnt1
ENSMUSG00000012017	736.953	-0.204588	0.153333	-1.33427	0.182115	0.521922	Scarf2
ENSMUSG00000012076	314.364	-0.158214	0.103146	-1.53388	0.125058	0.439608	Brms1l
ENSMUSG00000012114	616.251	0.04355	0.147162	0.295933	0.767281	0.917598	Med15
ENSMUSG00000012117	352.639	-0.0942191	0.151979	-0.619948	0.535292	0.816357	Dhdds
ENSMUSG00000012296	810.504	0.0314603	0.0918575	0.34249	0.731982	0.904822	Tjap1
ENSMUSG00000012405	5096.84	-0.145389	0.100496	-1.44671	0.147979	0.471758	Rpl15
ENSMUSG00000012422	784.378	-0.220604	0.116882	-1.88741	0.0591057	0.297473	Tmem167
ENSMUSG00000012428	241.908	-1.23328	0.31588	-3.90428	9.45065e-05	0.00534885	Steap4
ENSMUSG00000012429	83.461	-0.0521087	0.20715	-0.251551	0.801388	0.929834	Mplkip
ENSMUSG00000012443	1360.85	-0.0550188	0.104223	-0.527897	0.597571	0.846222	Kif11
ENSMUSG00000012483	180.983	-0.164018	0.147942	-1.10866	0.267577	0.621722	Rpa3
ENSMUSG00000012519	859.427	0.0666014	0.0960931	0.693092	0.488252	0.788661	Mlkl
ENSMUSG00000012535	1988.84	0.0734557	0.0719102	1.02149	0.307021	0.653594	Tnpo3
ENSMUSG00000012609	152.16	-0.334663	0.194805	-1.71794	0.0858075	0.362248	Ttll5
ENSMUSG00000012640	98.8949	0.164712	0.217331	0.757887	0.448519	0.766123	Zfp715
ENSMUSG00000012819	8.82325	0.678352	0.67762	1.00108	0.316788		Cdh23
ENSMUSG00000012848	4843.09	-0.0124491	0.0911117	-0.136636	0.891319	0.963928	Rps5
ENSMUSG00000012889	133.194	0.387898	0.271703	1.42765	0.153392	0.479532	Podnl1
ENSMUSG00000013033	692.563	-0.239738	0.205392	-1.16722	0.243121	0.593814	Adgrl1
ENSMUSG00000013076	1354.74	0.0440694	0.0857304	0.514046	0.60722	0.850115	Amotl1
ENSMUSG00000013089	640.343	-0.00582695	0.0796446	-0.0731619	0.941677	0.979597	Etv5
ENSMUSG00000013150	188	0.098859	0.161445	0.61234	0.540313	0.819955	Gfod2
ENSMUSG00000013155	230.741	-0.264585	0.15573	-1.69899	0.0893203	0.371343	Enkd1
ENSMUSG00000013160	734.245	-0.0122444	0.116327	-0.105259	0.91617	0.969164	Atp6v0d1
ENSMUSG00000013236	1726.78	0.0625977	0.0735349	0.851265	0.394622	0.726786	Ptprs
ENSMUSG00000013275	449.639	0.0444536	0.256749	0.17314	0.862541	0.953914	Slc41a1
ENSMUSG00000013367	16.9287	-1.13314	0.584089	-1.94001	0.0523782		Iglon5
ENSMUSG00000013415	24.536	1.90568	0.720046	2.64661	0.00813024		Igf2bp1
ENSMUSG00000013419	69.0378	-0.300319	0.253193	-1.18612	0.235573	0.586984	Zfp651
ENSMUSG00000013465	598.447	-0.000300149	0.181514	-0.00165359	0.998681	0.99992	Nelfb
ENSMUSG00000013495	91.7563	-0.141932	0.192149	-0.738655	0.460116	0.773043	Tmem175
ENSMUSG00000013539	68.8626	-0.0155384	0.224913	-0.0690864	0.944921	0.98112	Tango2
ENSMUSG00000013593	1296.15	-0.0889536	0.0900262	-0.988085	0.323111	0.669133	Ndufs2
ENSMUSG00000013622	102.808	-0.410157	0.99708	-0.411359	0.68081	0.881884	Atraid
ENSMUSG00000013629	3012.37	0.255629	0.0634196	4.03075	5.55985e-05	0.00374726	Cad
ENSMUSG00000013646	391.112	0.487124	0.450209	1.08199	0.279255	0.630909	Sh3bp5l
ENSMUSG00000013662	709.29	0.0243169	0.136237	0.17849	0.858338	0.95305	Atad1
ENSMUSG00000013663	1548.11	0.150714	0.119785	1.2582	0.208319	0.556633	Pten
ENSMUSG00000013698	1401.06	0.101778	0.0710887	1.4317	0.152228	0.477442	Pea15a
ENSMUSG00000013701	1250.07	0.0466747	0.0825199	0.565618	0.571653	0.834493	Timm23
ENSMUSG00000013736	590.741	0.117273	0.104832	1.11868	0.263278	0.616123	Trnt1
ENSMUSG00000013787	1911.21	-0.125859	0.0819372	-1.53604	0.124529	0.438833	Ehmt2
ENSMUSG00000013822	249.608	-0.371697	0.111713	-3.32724	0.000877093	0.0245739	Elof1
ENSMUSG00000013833	470.059	-0.24491	0.133387	-1.83608	0.0663464	0.316783	Med16
ENSMUSG00000013846	81.5582	-0.632484	2.88766	-0.21903	0.826627	0.939695	St3gal1
ENSMUSG00000013858	1166.95	-0.0878163	0.124358	-0.706156	0.480091	0.784251	Tmem259
ENSMUSG00000013878	213.397	-0.176464	0.132492	-1.33189	0.182898	0.523077	Rnf170
ENSMUSG00000013921	383.659	-0.203026	0.13864	-1.46442	0.14308	0.466219	Clip3
ENSMUSG00000013973	292.769	0.0823588	0.115639	0.712209	0.476335	0.782631	Dedd
ENSMUSG00000013997	115.142	-0.310581	0.162722	-1.90866	0.0563061	0.289184	Nit1
ENSMUSG00000014039	140.201	0.0429792	0.410607	0.104672	0.916636	0.969203	Prdm15
ENSMUSG00000014074	426.967	-0.138182	0.0870488	-1.58741	0.11242	0.417215	Rnf168
ENSMUSG00000014075	59.7168	-0.2374	0.239645	-0.990634	0.321865	0.667918	Tctex1d2
ENSMUSG00000014077	909.015	0.00780954	0.0764429	0.102162	0.918628	0.969994	Chp1
ENSMUSG00000014164	32.5092	0.263166	0.331397	0.794112	0.42713		Klhl3
ENSMUSG00000014177	168.655	0.18498	0.13674	1.35278	0.176125	0.513613	Tvp23b
ENSMUSG00000014195	1421.07	0.0529265	0.0700452	0.755605	0.449886	0.766585	Dnajc7
ENSMUSG00000014226	1773.55	0.154598	0.0758576	2.03801	0.0415493	0.249193	Cacybp
ENSMUSG00000014232	106.925	-0.105351	0.173462	-0.607341	0.543625	0.820706	Cluap1
ENSMUSG00000014243	64.062	0.328457	0.240032	1.36839	0.171191	0.508456	Zswim7
ENSMUSG00000014245	59.8292	-4.69123e-05	0.22108	-0.000212196	0.999831	0.99992	Pigl
ENSMUSG00000014294	480.975	-0.144273	0.129745	-1.11197	0.26615	0.619901	Ndufa2
ENSMUSG00000014301	129.471	0.167037	0.19698	0.84799	0.396444	0.728489	Pam16
ENSMUSG00000014303	453.857	0.27909	0.17196	1.62299	0.104592	0.404843	Glis2
ENSMUSG00000014313	897.114	-0.106329	0.100078	-1.06246	0.288026	0.63728	Cox6c
ENSMUSG00000014329	82.147	-0.832886	0.244711	-3.40355	0.000665165	0.0207725	Bicc1
ENSMUSG00000014349	1855.21	0.0308668	0.0709281	0.435185	0.663428	0.877234	Ube2z
ENSMUSG00000014353	247.332	0.389823	0.175869	2.21656	0.0266535	0.197453	Tmem87b
ENSMUSG00000014355	2239.2	0.104483	0.102333	1.02101	0.307248	0.653594	Anapc1
ENSMUSG00000014361	87.3146	0.469176	0.279405	1.6792	0.0931133	0.379301	Mertk
ENSMUSG00000014402	477.959	0.00350829	0.102027	0.0343858	0.972569	0.98951	Tsg101
ENSMUSG00000014418	233.996	-0.331417	0.173804	-1.90684	0.0565407	0.289791	Hps5
ENSMUSG00000014426	86.0753	-0.463009	0.918293	-0.504207	0.614116	0.853044	Map3k4
ENSMUSG00000014444	4098.2	-0.205101	0.0988915	-2.074	0.0380796	0.239251	Piezo1
ENSMUSG00000014470	224.526	0.0188056	0.125232	0.150167	0.880633	0.960129	Rnf166
ENSMUSG00000014496	91.011	0.347349	0.398966	0.870624	0.38396	0.716338	Ankrd28
ENSMUSG00000014498	1833.76	0.0854366	0.126873	0.673404	0.50069	0.796244	Ankrd52
ENSMUSG00000014504	426.236	0.149469	0.093252	1.60285	0.108969	0.413318	Srp19
ENSMUSG00000014547	223.966	-0.0714638	0.135686	-0.526685	0.598412	0.846543	Wdfy2
ENSMUSG00000014550	611.833	0.124568	0.0927918	1.34245	0.179452	0.518558	Rbsn
ENSMUSG00000014551	416.216	0.253236	0.146187	1.73228	0.0832242	0.357063	Mrps25
ENSMUSG00000014554	103.009	-0.143716	0.235571	-0.610075	0.541812	0.820247	Dguok
ENSMUSG00000014592	59.6719	-0.335258	0.240227	-1.39559	0.162839	0.495094	Camta1
ENSMUSG00000014599	6643.56	0.296239	0.125487	2.36072	0.0182393	0.159955	Csf1
ENSMUSG00000014601	700.642	-0.104447	0.0821948	-1.27072	0.203827	0.550122	Strip1
ENSMUSG00000014606	623.371	-0.0701672	0.10539	-0.665783	0.50555	0.798376	Slc25a11
ENSMUSG00000014633	178.36	-0.352867	0.209015	-1.68823	0.0913667	0.376032	Cmc2
ENSMUSG00000014668	215.391	-0.35836	0.147889	-2.42317	0.0153856	0.144388	Chfr
ENSMUSG00000014748	1054.28	0.19702	0.0825513	2.38663	0.0170034	0.152872	Tex261
ENSMUSG00000014763	116.642	-0.172055	0.304613	-0.56483	0.572189	0.834811	Fam120b
ENSMUSG00000014767	252.385	-0.0588024	0.139635	-0.421114	0.673672	0.879593	Tbp
ENSMUSG00000014769	51.0227	0.100573	0.356128	0.282407	0.777631		Psmb1
ENSMUSG00000014771	240.199	-0.0708443	0.152783	-0.463693	0.642868	0.868194	Pdcd2
ENSMUSG00000014773	21.3047	-0.68682	0.642994	-1.06816	0.285448		Dll1
ENSMUSG00000014776	23.1675	0.331826	0.383181	0.865977	0.386503		Nol3
ENSMUSG00000014778	649.723	-0.12573	0.147861	-0.850324	0.395145	0.72693	Fhod1
ENSMUSG00000014782	52.7078	0.125777	0.324883	0.387147	0.698647	0.891225	Plekhg4
ENSMUSG00000014786	127.995	-0.0656128	0.235813	-0.278241	0.780827	0.921895	Slc9a5
ENSMUSG00000014791	10.3327	1.21308	0.957449	1.26699	0.205157		Elmo3
ENSMUSG00000014813	172.97	-0.377498	0.241023	-1.56623	0.117294	0.425571	Stc1
ENSMUSG00000014837	67.9388	0.517746	1.52464	0.339587	0.734168	0.905727	4931428F04Rik
ENSMUSG00000014846	20.9442	-0.226567	0.471231	-0.480798	0.63066		Tppp3
ENSMUSG00000014850	335.216	0.248129	0.128362	1.93305	0.05323	0.279429	Msh3
ENSMUSG00000014852	25.133	-0.265324	0.394243	-0.672996	0.50095		Adamts13
ENSMUSG00000014856	165.597	0.00555513	0.133221	0.0416987	0.966739	0.98712	Tmem208
ENSMUSG00000014859	1008.55	0.0492864	0.063557	0.775468	0.438063	0.759759	E2f4
ENSMUSG00000014867	2863.14	0.108314	0.129909	0.833769	0.404411	0.735523	Surf4
ENSMUSG00000014873	248.244	-0.0699587	0.12462	-0.561377	0.574541	0.836216	Surf2
ENSMUSG00000014905	156.807	-0.155152	0.19038	-0.814961	0.415095	0.74407	Dnajb9
ENSMUSG00000014907	686.927	-0.00194682	0.106231	-0.0183263	0.985379	0.994906	Naf1
ENSMUSG00000014932	322.095	0.151429	0.189116	0.80072	0.423294	0.74857	Yes1
ENSMUSG00000014956	1294.88	-0.749823	0.106933	-7.01207	2.34814e-12	1.61652e-09	Ppp1cb
ENSMUSG00000014959	1458.7	0.0349055	0.0741445	0.470777	0.6378	0.864838	Gorasp2
ENSMUSG00000014980	173.228	0.15226	0.228181	0.667276	0.504596	0.798365	Tsen15
ENSMUSG00000015002	1369.15	0.108599	0.080766	1.34462	0.178749	0.517507	Efr3a
ENSMUSG00000015013	125.889	-0.0369696	0.184919	-0.199924	0.84154	0.946042	Trappc2l
ENSMUSG00000015016	82.5668	0.914117	1.93369	0.472733	0.636404	0.864018	Acsf3
ENSMUSG00000015023	1085.87	0.152164	0.0753824	2.01856	0.0435329	0.255368	Ddx19a
ENSMUSG00000015027	128.036	-0.123417	0.204312	-0.60406	0.545804	0.822203	Galns
ENSMUSG00000015053	157.842	0.316372	0.291353	1.08587	0.277535	0.629976	Gata2
ENSMUSG00000015087	849.276	0.492587	0.0986052	4.99555	5.86691e-07	0.00010281	Rabl6
ENSMUSG00000015092	906.742	-0.125441	0.126095	-0.994813	0.319827	0.666508	Edf1
ENSMUSG00000015094	215.3	-0.383127	0.208705	-1.83573	0.0663969	0.316783	Npdc1
ENSMUSG00000015095	384.842	-0.166721	0.137095	-1.2161	0.223946	0.574166	Fbxw5
ENSMUSG00000015112	696.732	0.17943	0.1032	1.73866	0.082095	0.354206	Slc25a13
ENSMUSG00000015120	2791.93	0.0525499	0.0603126	0.871293	0.383594	0.716045	Ube2i
ENSMUSG00000015126	227.469	-0.22705	0.151007	-1.50358	0.13269	0.451898	Tsr3
ENSMUSG00000015127	215.853	0.355904	0.202237	1.75984	0.0784355	0.34503	Unkl
ENSMUSG00000015133	706.17	0.00971598	0.164686	0.0589971	0.952954	0.983464	Lrrk1
ENSMUSG00000015134	7.84754	0.328604	0.711888	0.461595	0.644372		Aldh1a3
ENSMUSG00000015143	6339.55	0.258015	0.0829758	3.10951	0.00187395	0.0404053	Actn1
ENSMUSG00000015149	463.182	-0.0417347	0.127243	-0.327993	0.742917	0.908775	Sirt2
ENSMUSG00000015165	3627.18	0.0405994	0.088043	0.461131	0.644705	0.868821	Hnrnpl
ENSMUSG00000015176	67.8076	0.643041	2.63227	0.244291	0.807005	0.931317	Nolc1
ENSMUSG00000015189	281.956	-0.405056	0.149082	-2.71701	0.00658755	0.0867361	Casd1
ENSMUSG00000015202	261.865	0.0961205	0.110539	0.869562	0.38454	0.716865	Cnksr3
ENSMUSG00000015214	228.28	0.0893241	0.124665	0.716512	0.473675	0.781232	Mtmr1
ENSMUSG00000015217	748.018	-0.127953	0.134533	-0.95109	0.341559	0.68668	Hmgb3
ENSMUSG00000015222	37.2977	-0.472421	0.487036	-0.969992	0.33205		Map2
ENSMUSG00000015243	103.38	-0.474212	0.249147	-1.90334	0.0569959	0.291111	Abca1
ENSMUSG00000015247	207.901	-0.182571	0.218481	-0.835637	0.403359	0.734475	Nipsnap3b
ENSMUSG00000015289	167.469	-0.072713	0.154808	-0.4697	0.63857	0.865251	Lage3
ENSMUSG00000015290	383.963	-0.111734	0.112468	-0.993475	0.320479	0.666879	Ubl4a
ENSMUSG00000015291	1025.64	0.110411	0.0939638	1.17504	0.23998	0.59181	Gdi1
ENSMUSG00000015305	1012.67	0.0485656	0.0976653	0.497266	0.619002	0.854841	Sash1
ENSMUSG00000015312	192.196	0.637403	0.230108	2.77001	0.00560542	0.0780708	Gadd45b
ENSMUSG00000015316	16.0915	0.00897564	0.445538	0.0201456	0.983927		Slamf1
ENSMUSG00000015335	165.145	0.0839827	0.182455	0.460291	0.645307	0.869211	Zdhhc12
ENSMUSG00000015337	23.2002	-0.133655	0.394079	-0.339158	0.734491		Endog
ENSMUSG00000015341	812.455	0.109685	0.0800642	1.36996	0.170699	0.507621	Golga7
ENSMUSG00000015342	46.8826	0.278485	0.473842	0.587718	0.556722		Xk
ENSMUSG00000015354	100.157	-0.0964459	0.341632	-0.282309	0.777707	0.920422	Pcolce2
ENSMUSG00000015357	569.429	0.130981	0.115449	1.13454	0.25657	0.609669	Clpx
ENSMUSG00000015363	576.35	-0.0527333	0.113463	-0.46476	0.642103	0.867819	Trabd
ENSMUSG00000015377	5.52378	-1.05065	1.78596	-0.588283	0.556342		Dennd6b
ENSMUSG00000015452	21.2426	-0.0175349	0.433428	-0.0404563	0.967729		Ager
ENSMUSG00000015461	674.428	-0.0313621	0.113195	-0.277063	0.781732	0.922216	Atf6b
ENSMUSG00000015467	5.84849	-0.681086	0.688465	-0.989282	0.322525		Egfl8
ENSMUSG00000015474	179.165	0.153554	0.14907	1.03008	0.302973	0.650056	Ppt2
ENSMUSG00000015478	219.607	-0.201824	0.156305	-1.29122	0.196628	0.53872	Rnf5
ENSMUSG00000015488	239.523	-0.290862	0.133065	-2.18586	0.0288257	0.206559	Cacfd1
ENSMUSG00000015501	439.478	-0.198458	0.134989	-1.47018	0.141514	0.464074	Hivep2
ENSMUSG00000015522	724.679	0.127307	0.124675	1.02111	0.307202	0.653594	Arnt
ENSMUSG00000015533	8.70372	0.450148	0.594827	0.756772	0.449187		Itga2
ENSMUSG00000015536	367.526	-0.135872	0.144739	-0.938739	0.347865	0.691425	Mocs2
ENSMUSG00000015542	55.3711	-0.257086	0.276028	-0.931376	0.351659	0.694731	Nat9
ENSMUSG00000015568	137.768	0.258449	0.268479	0.962641	0.335728	0.680805	Lpl
ENSMUSG00000015575	501.51	-0.0265502	0.109745	-0.241925	0.808838	0.932046	Atp6v0e
ENSMUSG00000015597	180.29	0.473787	0.305221	1.55228	0.120596	0.431154	Zfp318
ENSMUSG00000015605	889.862	0.221708	0.14045	1.57855	0.114439	0.420175	Srf
ENSMUSG00000015652	532.105	-0.1853	0.148789	-1.24539	0.212989	0.562561	Steap1
ENSMUSG00000015653	1761.48	-0.071262	0.125345	-0.568525	0.569678	0.833414	Steap2
ENSMUSG00000015656	26907.2	0.155152	0.105462	1.47116	0.141247	0.464074	Hspa8
ENSMUSG00000015659	55.0448	-0.0321804	0.322878	-0.0996672	0.920609	0.970875	Serac1
ENSMUSG00000015668	391.299	0.111379	0.116823	0.953399	0.340388	0.685613	Pdzd11
ENSMUSG00000015671	1507.03	0.153952	0.0925067	1.66422	0.0960679	0.385632	Psma2
ENSMUSG00000015672	132.017	-0.111964	0.168884	-0.662967	0.507351	0.799582	Mrpl32
ENSMUSG00000015697	860.625	0.0173352	0.09062	0.191296	0.848294	0.948365	Setdb1
ENSMUSG00000015702	40.9955	-0.00306144	0.259949	-0.0117771	0.990603		Anxa9
ENSMUSG00000015711	470.622	-0.247428	0.102657	-2.41025	0.0159418	0.14675	Prune1
ENSMUSG00000015714	2399.44	0.0378605	0.0983857	0.384817	0.700373	0.891439	Cers2
ENSMUSG00000015733	1850.77	-0.0316894	0.117748	-0.269128	0.787831	0.924535	Capza2
ENSMUSG00000015745	364.074	0.163878	0.148736	1.1018	0.270547	0.623799	Plekho1
ENSMUSG00000015747	163.418	-0.340574	0.283729	-1.20035	0.230003	0.58054	Vps45
ENSMUSG00000015748	704.109	0.156269	0.117443	1.33059	0.183323	0.523148	Prpf3
ENSMUSG00000015749	2657.54	-0.0670143	0.0900038	-0.744572	0.456531	0.770951	Anp32e
ENSMUSG00000015750	1188.38	-0.029113	0.0728775	-0.399479	0.68954	0.886826	Aph1a
ENSMUSG00000015755	994.288	-0.34714	0.105163	-3.30098	0.000963461	0.0261175	Tab2
ENSMUSG00000015757	408.035	0.155786	0.122968	1.26688	0.205197	0.552274	Ppil4
ENSMUSG00000015759	879.25	0.109277	0.0967511	1.12946	0.258703	0.611689	Cnih1
ENSMUSG00000015766	3193.96	-0.206354	0.176617	-1.16837	0.242658	0.593814	Eps8
ENSMUSG00000015776	838.638	0.126153	0.0846249	1.49073	0.136033	0.456815	Med22
ENSMUSG00000015790	213.678	0.121611	0.207828	0.58515	0.558447	0.827953	Surf1
ENSMUSG00000015804	516.59	0.0558784	0.109052	0.512401	0.60837	0.850476	Med28
ENSMUSG00000015806	493.762	-0.0703821	0.0977514	-0.720011	0.471518	0.780593	Qdpr
ENSMUSG00000015837	4887.66	0.136982	0.104461	1.31132	0.189749	0.530824	Sqstm1
ENSMUSG00000015839	1336.98	-0.343142	0.0892625	-3.84419	0.000120952	0.00622566	Nfe2l2
ENSMUSG00000015846	527.709	-0.220292	0.105856	-2.08106	0.037428	0.237609	Rxra
ENSMUSG00000015850	110.348	-1.39232	0.425903	-3.2691	0.00107892	0.0274369	Adamtsl4
ENSMUSG00000015869	819.056	-0.0107077	0.0849809	-0.126001	0.899731	0.964477	Prpsap1
ENSMUSG00000015880	888.71	-0.0316136	0.0978272	-0.323157	0.746576	0.911137	Ncapg
ENSMUSG00000015882	66.6558	-0.295337	0.279064	-1.05831	0.289914	0.63955	Lcorl
ENSMUSG00000015889	847.242	0.00744128	0.0737809	0.100856	0.919664	0.970508	Lta4h
ENSMUSG00000015932	3143.09	0.233976	0.0873318	2.67916	0.00738077	0.0931098	Dstn
ENSMUSG00000015937	1411.92	-0.0173862	0.0736792	-0.235972	0.813455	0.934774	H2afy
ENSMUSG00000015942	149.866	-0.13643	0.268433	-0.508246	0.611281	0.851746	Gtf2ird2
ENSMUSG00000015943	89.3334	-0.179516	0.173323	-1.03573	0.300326	0.647405	Bola1
ENSMUSG00000015944	383.785	0.274901	0.159386	1.72476	0.0845714	0.360011	Castor2
ENSMUSG00000015961	1739.82	0.187376	0.0679912	2.75588	0.00585336	0.0801345	Adss
ENSMUSG00000015971	267.815	-0.0776921	0.118451	-0.655903	0.511886	0.802175	Actr8
ENSMUSG00000015980	16.7209	-0.225001	0.514209	-0.437566	0.661701		Lrrc27
ENSMUSG00000015994	586.813	-0.0261294	0.104485	-0.250078	0.802527	0.930184	Fnta
ENSMUSG00000016018	1595.28	0.191028	0.0601824	3.17415	0.00150278	0.0357624	Mtrex
ENSMUSG00000016087	6.61358	1.43442	0.936457	1.53175	0.125584		Fli1
ENSMUSG00000016128	580.716	0.337599	0.139612	2.41813	0.0156005	0.145555	Stard13
ENSMUSG00000016181	243.498	0.370565	0.272627	1.35924	0.174072	0.510339	Utp25
ENSMUSG00000016194	10.1379	-1.53563	0.700479	-2.19225	0.0283613		Hsd11b1
ENSMUSG00000016206	69.7025	0.193801	0.220741	0.877957	0.379967	0.71484	H2-M3
ENSMUSG00000016239	173.071	0.0104797	0.156906	0.0667898	0.946749	0.981256	Lonrf3
ENSMUSG00000016252	316.327	-0.135119	0.148016	-0.912866	0.361313	0.702342	Atp5e
ENSMUSG00000016253	479.169	0.0888561	0.0978897	0.907716	0.364028	0.704169	Nelfcd
ENSMUSG00000016256	1704.93	0.219336	0.0841482	2.60654	0.00914614	0.105443	Ctsz
ENSMUSG00000016257	627.343	0.156107	0.0980854	1.59154	0.111488	0.416965	Prelid3b
ENSMUSG00000016262	202.196	-0.0769271	0.173179	-0.444207	0.656893	0.874716	Sertad4
ENSMUSG00000016308	200.819	0.230124	0.14035	1.63965	0.101079	0.397632	Ube2a
ENSMUSG00000016319	4781.04	-0.0502151	0.0611984	-0.82053	0.411914	0.741368	Slc25a5
ENSMUSG00000016344	216.535	-0.176485	0.14427	-1.2233	0.221217	0.57312	Ppdpf
ENSMUSG00000016356	11.5931	-0.730561	0.838199	-0.871584	0.383435		Col20a1
ENSMUSG00000016382	2958.88	0.250614	0.0612995	4.08836	4.34432e-05	0.00327114	Pls3
ENSMUSG00000016386	8.14037	-1.4327	0.954524	-1.50095	0.133368		Mpped2
ENSMUSG00000016409	268.596	0.184188	0.124472	1.47976	0.138936	0.461143	Nkap
ENSMUSG00000016427	215.061	0.0957808	0.129045	0.742227	0.45795	0.771629	Ndufa1
ENSMUSG00000016477	197.107	0.0433466	0.195609	0.221598	0.824627	0.939695	E2f3
ENSMUSG00000016481	430.82	0.0065788	0.124378	0.0528937	0.957817	0.984345	Cr1l
ENSMUSG00000016487	3712.08	0.316873	0.0673413	4.70548	2.53272e-06	0.00037165	Ppfibp1
ENSMUSG00000016493	7.76866	-0.112417	0.748437	-0.150202	0.880605		Cd46
ENSMUSG00000016494	6301.66	-0.164513	0.0803269	-2.04805	0.0405551	0.246762	Cd34
ENSMUSG00000016495	139.371	-0.0913329	0.145672	-0.626978	0.530674	0.814172	Plgrkt
ENSMUSG00000016496	20.9625	0.623285	0.434703	1.43382	0.151625		Cd274
ENSMUSG00000016503	478.996	-0.175175	0.155561	-1.12609	0.260129	0.613439	Gtf3a
ENSMUSG00000016510	128.523	-0.171904	0.159551	-1.07743	0.28129	0.6321	Mtif3
ENSMUSG00000016520	171.237	0.0814598	0.266954	0.305145	0.760256	0.915091	Lnx2
ENSMUSG00000016526	83.6528	0.461876	0.20573	2.24506	0.0247645	0.189075	Dyrk3
ENSMUSG00000016528	1865.18	0.11237	0.0875696	1.28321	0.19942	0.543786	Mapkapk2
ENSMUSG00000016534	2609.84	0.145014	0.110522	1.31209	0.189491	0.530442	Lamp2
ENSMUSG00000016541	1806.51	-0.0983821	0.0642056	-1.5323	0.125449	0.439714	Atxn10
ENSMUSG00000016552	90.4295	-0.0402865	0.199436	-0.202002	0.839915	0.945469	Foxred2
ENSMUSG00000016554	2926.3	0.119678	0.0537523	2.22646	0.0259832	0.193978	Eif3d
ENSMUSG00000016559	9090.28	-0.0881724	0.0686114	-1.2851	0.198758	0.542825	H3f3b
ENSMUSG00000016619	976.654	0.0906136	0.101857	0.889612	0.373674	0.710489	Nup50
ENSMUSG00000016624	18.8741	-0.63377	0.837647	-0.756608	0.449285		Phf21b
ENSMUSG00000016637	165.65	0.132176	0.158871	0.831972	0.405425	0.735691	Ift27
ENSMUSG00000016664	1609.28	0.306333	0.227079	1.34902	0.177332	0.514808	Pacsin2
ENSMUSG00000016757	1369.13	0.0506796	0.0752802	0.673212	0.500812	0.796244	Ttll12
ENSMUSG00000016831	720.271	0.124696	0.0986492	1.26403	0.206219	0.553478	Tox4
ENSMUSG00000016833	283.661	0.0338934	0.115557	0.293305	0.769289	0.917965	Mrps18c
ENSMUSG00000016918	55.7989	0.0913227	0.364792	0.250342	0.802323	0.930184	Sulf1
ENSMUSG00000016921	2977.88	-0.0207202	0.0547547	-0.378419	0.70512	0.89338	Srsf6
ENSMUSG00000016933	1117.2	-0.036225	0.117845	-0.307396	0.758542	0.915091	Plcg1
ENSMUSG00000016940	196.386	-0.394178	0.17452	-2.25865	0.0239053	0.185358	Kctd2
ENSMUSG00000016946	627.138	0.1349	0.100989	1.33579	0.181618	0.521769	Kctd5
ENSMUSG00000016984	281.544	0.00918567	0.1274	0.0721008	0.942522	0.979724	Etaa1
ENSMUSG00000017002	188.419	-1.49111	0.348202	-4.28233	1.8495e-05	0.00169767	Slpi
ENSMUSG00000017009	1084.69	-0.198368	0.107933	-1.83788	0.0660807	0.316229	Sdc4
ENSMUSG00000017057	464.799	-0.536341	0.203851	-2.63105	0.00851227	0.100833	Il13ra1
ENSMUSG00000017119	845.39	0.0537489	0.103992	0.516859	0.605255	0.849355	Nbr1
ENSMUSG00000017132	108.063	-0.202875	0.285721	-0.710046	0.477676	0.782717	Cyth1
ENSMUSG00000017144	374.642	0.185885	0.114338	1.62575	0.104003	0.403736	Rnd3
ENSMUSG00000017146	416.949	0.00370936	0.135725	0.0273301	0.978196	0.991496	Brca1
ENSMUSG00000017167	53.2212	0.153892	0.333446	0.461519	0.644427	0.868821	Cntnap1
ENSMUSG00000017176	385.022	-0.20329	0.112647	-1.80466	0.0711282	0.328478	Nt5c3b
ENSMUSG00000017188	221.11	-0.192759	0.131031	-1.47109	0.141267	0.464074	Coa3
ENSMUSG00000017210	595.019	-0.173289	0.191691	-0.904002	0.365994	0.704959	Med24
ENSMUSG00000017221	3124.59	0.075625	0.0892561	0.847281	0.396839	0.728804	Psmd3
ENSMUSG00000017264	1205.54	0.0358941	0.0864731	0.415089	0.678076	0.881467	Exosc10
ENSMUSG00000017286	383.089	-0.381511	0.227142	-1.67961	0.0930328	0.379301	Glod4
ENSMUSG00000017288	398.085	0.197706	0.122627	1.61225	0.106907	0.408878	Vps53
ENSMUSG00000017291	1048.91	0.11927	0.131427	0.907498	0.364143	0.704176	Taok1
ENSMUSG00000017299	356.835	-0.164299	0.111181	-1.47777	0.139471	0.461772	Dnttip1
ENSMUSG00000017307	55.8303	0.236895	0.2183	1.08518	0.277842	0.630209	Acot8
ENSMUSG00000017314	102.172	-0.336504	0.264595	-1.27177	0.203455	0.550042	Mpp2
ENSMUSG00000017376	304.229	0.632867	0.21535	2.93878	0.00329503	0.0567098	Nlk
ENSMUSG00000017386	788.481	0.0472889	0.104129	0.454139	0.649728	0.871428	Traf4
ENSMUSG00000017400	159.713	-0.749396	0.22031	-3.40155	0.000670052	0.0207725	Stac2
ENSMUSG00000017404	7339.4	-0.235828	0.0849829	-2.77501	0.00552004	0.0771046	Rpl19
ENSMUSG00000017405	100.213	0.0205857	0.260808	0.0789302	0.937088	0.977875	Nek8
ENSMUSG00000017417	56.5044	-1.49964	0.422875	-3.5463	0.000390689	0.0141028	Plxdc1
ENSMUSG00000017418	222.101	0.0723287	0.234933	0.307869	0.758182	0.915091	Arl5b
ENSMUSG00000017421	1818.54	-0.0646534	0.0714023	-0.90548	0.365211	0.704959	Zfp207
ENSMUSG00000017428	2178.52	0.182029	0.0867586	2.09811	0.0358952	0.231601	Psmd11
ENSMUSG00000017446	43.1107	0.441679	0.722541	0.611286	0.54101		C1qtnf1
ENSMUSG00000017466	7739.01	0.0433915	0.043714	0.992621	0.320895	0.667193	Timp2
ENSMUSG00000017478	1256.18	-0.0713403	0.100498	-0.709869	0.477785	0.782717	Zc3h18
ENSMUSG00000017485	1609.7	-0.0653134	0.118426	-0.551511	0.581284	0.839679	Top2b
ENSMUSG00000017491	29.3843	-0.0352853	0.386608	-0.0912688	0.927279		Rarb
ENSMUSG00000017493	1868.32	-0.012801	0.200444	-0.0638631	0.949079	0.981983	Igfbp4
ENSMUSG00000017499	572.819	0.0628784	0.107115	0.587019	0.557191	0.827639	Cdc6
ENSMUSG00000017548	1484.22	0.0742686	0.107983	0.687779	0.491592	0.790583	Suz12
ENSMUSG00000017550	296.271	0.313671	0.13614	2.30403	0.0212211	0.173376	Atad5
ENSMUSG00000017561	483.938	0.182856	0.149547	1.22273	0.221431	0.57312	Crlf3
ENSMUSG00000017615	1999.95	0.164636	0.0779962	2.11083	0.0347873	0.227799	Tnfaip1
ENSMUSG00000017631	803.679	0.10767	0.0946686	1.13734	0.255397	0.608319	Abr
ENSMUSG00000017664	391.397	-0.00622321	0.121153	-0.0513664	0.959034	0.984377	Slc35c2
ENSMUSG00000017667	246.803	-0.00127369	0.133646	-0.00953039	0.992396	0.997507	Zfp334
ENSMUSG00000017670	776.498	-0.104478	0.135967	-0.768409	0.442244	0.761754	Elmo2
ENSMUSG00000017677	1361.95	0.0423027	0.0780733	0.541833	0.587933	0.841976	Wsb1
ENSMUSG00000017679	439.313	0.209914	0.125848	1.668	0.0953156	0.384373	Ttpal
ENSMUSG00000017686	655.166	0.0313496	0.0745191	0.420692	0.67398	0.879593	Rhot1
ENSMUSG00000017697	74.2284	0.204411	0.238658	0.856502	0.39172	0.724278	Ada
ENSMUSG00000017707	1200.14	0.149224	0.12334	1.20986	0.226333	0.576783	Serinc3
ENSMUSG00000017713	10.5934	-0.76014	0.625258	-1.21572	0.224091		Tha1
ENSMUSG00000017715	1109.24	0.02176	0.0934686	0.232806	0.815912	0.934774	Pgs1
ENSMUSG00000017716	1055.94	-0.00291169	0.0901515	-0.0322977	0.974235	0.990015	Birc5
ENSMUSG00000017718	80.1104	-0.0449907	0.296062	-0.151964	0.879215	0.959628	Afmid
ENSMUSG00000017721	678.167	-0.168472	0.0841442	-2.00219	0.0452646	0.260921	Pigt
ENSMUSG00000017724	1034.7	-0.117324	0.102992	-1.13916	0.254638	0.607476	Etv4
ENSMUSG00000017734	78.6074	-0.185657	0.213741	-0.868607	0.385062	0.717412	Dbndd2
ENSMUSG00000017737	14.6666	1.92109	0.587865	3.26792	0.00108342		Mmp9
ENSMUSG00000017747	115.402	-0.0262689	0.174703	-0.150363	0.880478	0.960072	Ghdc
ENSMUSG00000017754	19.5493	0.258839	0.407133	0.63576	0.524933		Pltp
ENSMUSG00000017756	402.966	0.0388136	0.102846	0.377395	0.70588	0.893552	Slc12a7
ENSMUSG00000017760	1598.98	-0.0466555	0.0757315	-0.616065	0.537851	0.818345	Ctsa
ENSMUSG00000017764	126.984	0.0542317	0.154848	0.350226	0.726169	0.9022	Zswim1
ENSMUSG00000017765	1144.63	0.198425	0.0865711	2.29205	0.0219029	0.176211	Slc12a4
ENSMUSG00000017774	3812.69	0.339446	0.0943067	3.59938	0.000318972	0.0121033	Myo1c
ENSMUSG00000017776	1912.07	0.0898447	0.0556042	1.61579	0.10614	0.40756	Crk
ENSMUSG00000017778	718.306	-0.178712	0.11008	-1.62348	0.104487	0.40476	Cox7c
ENSMUSG00000017781	2163.98	0.176552	0.102074	1.72965	0.0836925	0.358342	Pitpna
ENSMUSG00000017801	233.625	0.0417494	0.12904	0.323539	0.746287	0.911137	Mlx
ENSMUSG00000017802	390.4	0.121964	0.117004	1.04239	0.29723	0.644476	Retreg3
ENSMUSG00000017830	51.2537	-0.113389	0.304932	-0.371849	0.710005		Dhx58
ENSMUSG00000017831	871.722	0.0938439	0.0872723	1.0753	0.28224	0.633115	Rab5a
ENSMUSG00000017837	316.266	0.235528	0.117849	1.99855	0.0456566	0.26224	Nkiras2
ENSMUSG00000017843	539.131	-0.103078	0.12715	-0.810679	0.41755	0.744884	Ppp2r5c
ENSMUSG00000017858	192.246	-0.34213	0.12831	-2.66644	0.00766591	0.094491	Ift52
ENSMUSG00000017861	1148.82	0.249903	0.167675	1.4904	0.136118	0.456815	Mybl2
ENSMUSG00000017868	22.5836	0.243772	0.431853	0.56448	0.572427		Sgk2
ENSMUSG00000017929	533.102	0.160605	0.273823	0.586529	0.55752	0.827639	B4galt5
ENSMUSG00000017969	71.2432	0.227756	0.405217	0.562058	0.574076	0.835812	Ptgis
ENSMUSG00000017978	8.29078	-0.385414	0.574123	-0.671309	0.502024		Cadps2
ENSMUSG00000017999	1284.77	0.126076	0.0788381	1.59918	0.10978	0.414276	Ddx27
ENSMUSG00000018001	913.628	0.0233566	0.148136	0.15767	0.874717	0.958231	Cyth3
ENSMUSG00000018012	32.0323	-0.997633	0.375997	-2.6533	0.0079709		Rac3
ENSMUSG00000018040	1177.06	0.0909939	0.0868468	1.04775	0.294753	0.643013	Rrp7a
ENSMUSG00000018042	3349.8	-0.19676	0.0830836	-2.36822	0.0178739	0.157899	Cyb5r3
ENSMUSG00000018068	444.234	0.13767	0.16962	0.811637	0.417	0.744553	Ints2
ENSMUSG00000018076	970.342	0.130094	0.123342	1.05475	0.291542	0.641068	Med13l
ENSMUSG00000018102	108.507	0.694335	0.356733	1.94637	0.05161	0.276413	Hist1h2bc
ENSMUSG00000018143	424.944	0.159248	0.149804	1.06304	0.287763	0.637138	Mafk
ENSMUSG00000018160	666.794	-0.375333	0.154504	-2.42928	0.0151289	0.143003	Med1
ENSMUSG00000018167	185.094	0.00111107	0.118785	0.00935366	0.992537	0.997507	Stard3
ENSMUSG00000018171	1630.79	0.0511248	0.113493	0.450465	0.652375	0.873076	Vmp1
ENSMUSG00000018189	668.369	0.144596	0.0785319	1.84124	0.0655857	0.315742	Uchl5
ENSMUSG00000018196	136.495	-0.307632	0.164981	-1.86465	0.0622305	0.306097	Glrx2
ENSMUSG00000018199	600.161	0.204761	0.127122	1.61074	0.107236	0.409648	Ro60
ENSMUSG00000018209	594.886	0.243196	0.188142	1.29262	0.196142	0.537661	Stk4
ENSMUSG00000018217	335.628	-0.495615	0.200015	-2.47789	0.0132161	0.132752	Pmp22
ENSMUSG00000018239	146.059	0.342605	0.164064	2.08824	0.0367765	0.235204	Zcchc10
ENSMUSG00000018286	1383.91	0.087724	0.0855426	1.0255	0.305127	0.651632	Psmb6
ENSMUSG00000018287	497.032	0.0618459	0.0929359	0.665469	0.505751	0.798562	Spag7
ENSMUSG00000018293	9252.53	-0.00690466	0.0953178	-0.0724383	0.942253	0.979724	Pfn1
ENSMUSG00000018322	518.86	0.160654	0.110017	1.46026	0.144219	0.467339	Tomm34
ENSMUSG00000018326	2990.61	0.0446219	0.0489633	0.911332	0.36212	0.703369	Ywhab
ENSMUSG00000018334	146.502	-0.225194	0.172222	-1.30758	0.191017	0.532679	Ksr1
ENSMUSG00000018339	29.736	0.0944072	0.441357	0.213902	0.830623		Gpx3
ENSMUSG00000018340	1786.16	0.23798	0.122733	1.939	0.0525017	0.277571	Anxa6
ENSMUSG00000018347	93.3292	0.0756832	0.189461	0.399467	0.689549	0.886826	Zkscan6
ENSMUSG00000018362	3930.1	0.0640985	0.0612899	1.04582	0.295642	0.643205	Kpna2
ENSMUSG00000018363	654.79	0.0842258	0.101299	0.831456	0.405716	0.735709	Smurf2
ENSMUSG00000018372	104.216	-0.080969	0.220551	-0.367121	0.713529	0.89696	Cep95
ENSMUSG00000018377	652.137	-0.053534	0.0930869	-0.575097	0.565226	0.831575	Vezf1
ENSMUSG00000018378	388.401	-0.181385	0.221403	-0.819251	0.412643	0.742389	2210416O15Rik
ENSMUSG00000018379	4325.77	-0.315385	0.0957853	-3.29262	0.00099257	0.0264265	Srsf1
ENSMUSG00000018387	9.21197	0.354041	0.588482	0.601618	0.547429		Shroom1
ENSMUSG00000018395	295.892	0.14536	0.202364	0.718312	0.472565	0.781098	Kif3a
ENSMUSG00000018398	893.288	-0.0634409	0.0920714	-0.689041	0.490798	0.790379	Sept8
ENSMUSG00000018401	786.132	0.0121714	0.0955487	0.127385	0.898636	0.964372	Mtmr4
ENSMUSG00000018405	137.112	0.760065	0.76195	0.997527	0.318509	0.665465	Mrm1
ENSMUSG00000018412	556.75	0.130216	0.0870855	1.49526	0.134846	0.455376	Kansl1
ENSMUSG00000018415	360.613	0.0614902	0.0986682	0.623201	0.533152	0.815509	Gid4
ENSMUSG00000018417	1246.7	-0.316954	0.0616415	-5.14189	2.71987e-07	5.46127e-05	Myo1b
ENSMUSG00000018425	516.844	-0.038276	0.134278	-0.285049	0.775606	0.920094	Dhx40
ENSMUSG00000018427	12.7304	0.111333	0.506059	0.220001	0.82587		Ypel2
ENSMUSG00000018428	789.276	0.0774559	0.0842597	0.919252	0.357964	0.699171	Akap1
ENSMUSG00000018433	903.603	0.211704	0.0690047	3.06797	0.00215521	0.0435469	Nol11
ENSMUSG00000018442	367.238	0.148257	0.114267	1.29746	0.194473	0.536595	Derl2
ENSMUSG00000018446	2214.47	0.0434061	0.0558295	0.777477	0.436877	0.759301	C1qbp
ENSMUSG00000018449	82.379	-0.0880134	0.231682	-0.379889	0.704028	0.893023	Rpain
ENSMUSG00000018470	21.5385	1.06966	0.482417	2.21729	0.0266031		Kcnab3
ENSMUSG00000018474	2660.51	-0.255822	0.101475	-2.52105	0.0117007	0.121377	Chd3
ENSMUSG00000018476	604.104	-0.204861	0.114741	-1.78542	0.0741939	0.335376	Kdm6b
ENSMUSG00000018481	766.997	0.159551	0.121216	1.31625	0.188089	0.528513	Appbp2
ENSMUSG00000018500	41.4955	0.445941	0.372528	1.19707	0.231281		Adora2b
ENSMUSG00000018501	1342.59	0.0193943	0.117113	0.165604	0.868469	0.956169	Ncor1
ENSMUSG00000018507	51.2733	0.414445	0.389493	1.06406	0.2873		Trpv2
ENSMUSG00000018509	82.1484	-0.342494	0.296691	-1.15438	0.248344	0.599161	Cenpv
ENSMUSG00000018537	431.959	-0.152995	0.116731	-1.31067	0.18997	0.531167	Pcgf2
ENSMUSG00000018541	205.8	0.104938	0.120582	0.870264	0.384156	0.716428	Cwc25
ENSMUSG00000018547	697.431	0.451051	0.127086	3.54917	0.000386447	0.0140366	Pip4k2b
ENSMUSG00000018548	721.173	0.0119454	0.0985201	0.121249	0.903494	0.96494	Trim37
ENSMUSG00000018559	1357.5	-0.0110921	0.0571013	-0.194253	0.845978	0.947401	Ctdnep1
ENSMUSG00000018565	472.394	0.171395	0.12378	1.38467	0.166153	0.500587	Elp5
ENSMUSG00000018567	1383.67	-0.177479	0.0965457	-1.83829	0.0660196	0.316125	Gabarap
ENSMUSG00000018570	7.07556	-0.944122	0.74779	-1.26255	0.206751		2810408A11Rik
ENSMUSG00000018572	761.528	0.0361435	0.0939401	0.384751	0.700422	0.891439	Phf23
ENSMUSG00000018574	576.378	0.131635	0.115695	1.13778	0.255214	0.608247	Acadvl
ENSMUSG00000018583	4594.22	0.0976213	0.0490541	1.99008	0.0465825	0.265522	G3bp1
ENSMUSG00000018585	366.694	-0.137403	0.112665	-1.21957	0.222627	0.573595	Atox1
ENSMUSG00000018593	8771.19	-0.050759	0.0730387	-0.69496	0.48708	0.788257	Sparc
ENSMUSG00000018599	99.4082	-0.387595	0.177631	-2.18203	0.0291075	0.207405	Mief2
ENSMUSG00000018604	512.341	-0.261396	0.130521	-2.00271	0.0452082	0.260908	Tbx3
ENSMUSG00000018648	222.049	0.484663	0.178795	2.71071	0.00671385	0.0876787	Dusp14
ENSMUSG00000018651	348.305	0.135371	0.128212	1.05584	0.291041	0.640569	Tada2a
ENSMUSG00000018659	77.8252	0.276687	0.201569	1.37267	0.169856	0.50652	Pnpo
ENSMUSG00000018661	419.845	-0.318338	0.121087	-2.629	0.00856361	0.101271	Cog1
ENSMUSG00000018666	912.381	0.117972	0.0889432	1.32638	0.184715	0.525313	Cbx1
ENSMUSG00000018669	271.523	-0.262681	0.143544	-1.82997	0.067255	0.318059	Cdk5rap3
ENSMUSG00000018672	202.208	-0.151326	0.167162	-0.905267	0.365324	0.704959	Copz2
ENSMUSG00000018677	1376.35	0.154208	0.0884686	1.74308	0.0813191	0.352195	Slc25a39
ENSMUSG00000018678	290.616	-0.165114	0.133464	-1.23714	0.216033	0.565642	Sp2
ENSMUSG00000018697	568.848	-0.0157169	0.0884908	-0.177611	0.859029	0.95305	Aatf
ENSMUSG00000018707	2845.31	-0.093411	0.10887	-0.858009	0.390888	0.72366	Dync1h1
ENSMUSG00000018733	111.757	0.625578	0.737668	0.848047	0.396412	0.728489	Pex12
ENSMUSG00000018736	825.233	-0.033485	0.134855	-0.248303	0.8039	0.930513	Ndel1
ENSMUSG00000018740	6.20218	0.572962	0.705995	0.811567	0.41704		Slc25a35
ENSMUSG00000018750	215.893	-0.239883	0.146347	-1.63914	0.101184	0.397719	Zbtb4
ENSMUSG00000018752	44.8939	-0.454278	0.329497	-1.3787	0.167987		Tnfsfm13
ENSMUSG00000018761	273.274	-0.00836797	0.111273	-0.0752019	0.940054	0.979006	Mpdu1
ENSMUSG00000018765	1436.75	-0.00503828	0.12495	-0.0403223	0.967836	0.987277	Fxr2
ENSMUSG00000018770	1932.5	0.000182815	0.0660524	0.00276773	0.997792	0.99992	Atp5g3
ENSMUSG00000018774	19.896	0.120687	0.522253	0.23109	0.817245		Cd68
ENSMUSG00000018796	378.463	0.0935499	0.160101	0.584317	0.559007	0.828114	Acsl1
ENSMUSG00000018800	204.255	0.217903	0.185339	1.1757	0.239714	0.591442	Abca5
ENSMUSG00000018809	108.289	0.307933	0.217262	1.41733	0.156385	0.484544	Smyd4
ENSMUSG00000018819	263.342	-0.304115	0.19978	-1.52225	0.127946	0.443898	Lsp1
ENSMUSG00000018820	242.978	0.158263	0.179706	0.880679	0.378492	0.714776	Zfyve27
ENSMUSG00000018821	333.994	-0.14244	0.155191	-0.917837	0.358704	0.699695	Avpi1
ENSMUSG00000018841	154.525	0.0337653	0.14825	0.227759	0.819834	0.936878	Rad51d
ENSMUSG00000018846	879.876	-0.161547	0.0931579	-1.73412	0.0828963	0.356242	Pank3
ENSMUSG00000018848	2408.8	0.210144	0.0718879	2.92321	0.00346438	0.0582717	Rars
ENSMUSG00000018849	345.243	0.119531	0.19839	0.602505	0.546838	0.822447	Wwc1
ENSMUSG00000018858	304.583	-0.173063	0.145472	-1.18967	0.234177	0.585118	Mrpl58
ENSMUSG00000018861	111.941	-0.0871952	0.194973	-0.447217	0.654719	0.87447	Fdxr
ENSMUSG00000018882	561.763	0.127142	0.0800704	1.58787	0.112315	0.417215	Mrpl45
ENSMUSG00000018899	354.209	-0.0779973	0.112453	-0.693602	0.487932	0.788513	Irf1
ENSMUSG00000018900	59.4105	-0.258533	0.234291	-1.10347	0.269823	0.622887	Slc22a5
ENSMUSG00000018906	878.587	0.214551	0.101429	2.11529	0.0344052	0.226656	P4ha2
ENSMUSG00000018909	175.574	-0.0492332	0.346763	-0.14198	0.887096	0.961699	Arrb1
ENSMUSG00000018916	5.45127	-0.595019	0.896929	-0.663396	0.507077		Csf2
ENSMUSG00000018920	118.281	-0.118345	0.264276	-0.447809	0.654291	0.87402	Cxcl16
ENSMUSG00000018921	758.705	-0.0232377	0.0866264	-0.268252	0.788505	0.924752	Pelp1
ENSMUSG00000018923	148.537	-0.267767	0.156298	-1.71318	0.0866796	0.364971	Med11
ENSMUSG00000018931	178.756	-0.261447	0.289948	-0.901703	0.367215	0.705725	Natd1
ENSMUSG00000018932	1804.6	0.0573543	0.0763865	0.750844	0.452747	0.76874	Map2k3
ENSMUSG00000018965	3451.65	-0.0941661	0.0903191	-1.04259	0.297137	0.644476	Ywhah
ENSMUSG00000018974	815.764	-0.110202	0.118314	-0.931444	0.351624	0.694731	Sart3
ENSMUSG00000018983	49.4079	0.567088	0.437748	1.29547	0.19516		E2f2
ENSMUSG00000018986	27.1293	0.174744	1.05828	0.165121	0.868849		Slfn3
ENSMUSG00000018995	99.4534	0.297573	0.260567	1.14202	0.253446	0.60553	Nars2
ENSMUSG00000018999	670.471	0.0770639	0.092803	0.830403	0.406311	0.736233	Slc35b4
ENSMUSG00000019039	141.379	0.0430376	0.307647	0.139893	0.888745	0.962238	Dalrd3
ENSMUSG00000019054	613.03	-0.220937	0.113493	-1.9467	0.0515706	0.276413	Fis1
ENSMUSG00000019055	528.699	0.284472	0.0987036	2.88209	0.00395053	0.0629342	Plod1
ENSMUSG00000019066	16.7497	-0.01706	0.485266	-0.035156	0.971955		Rab3d
ENSMUSG00000019080	49.9192	-0.0578174	0.231082	-0.250203	0.80243		Mfsd3
ENSMUSG00000019082	133.724	0.795751	1.03753	0.76697	0.443099	0.761754	Slc25a22
ENSMUSG00000019087	1796.27	-0.0681094	0.0775482	-0.878285	0.379789	0.714784	Atp6ap1
ENSMUSG00000019088	66.3328	-0.269369	0.278052	-0.968775	0.332658	0.677204	Dnase1l1
ENSMUSG00000019102	7.58628	-0.94042	0.654814	-1.43616	0.150956		Aldh3a1
ENSMUSG00000019122	52.1325	0.107424	0.623337	0.172336	0.863173		Ccl9
ENSMUSG00000019124	246.756	0.167765	0.179339	0.935463	0.34955	0.693344	Scrn1
ENSMUSG00000019132	1530.8	-0.0103017	0.102648	-0.10036	0.920059	0.970508	BC005537
ENSMUSG00000019139	58.1351	-3.80175	2.09015	-1.81888	0.0689292	0.322495	Isyna1
ENSMUSG00000019143	225.335	-0.0926446	0.305771	-0.302987	0.7619	0.91561	Hars2
ENSMUSG00000019158	159.175	-0.0590022	0.2069	-0.285173	0.775512	0.920094	Tmem160
ENSMUSG00000019173	1589.41	-0.0575654	0.0813552	-0.707581	0.479206	0.783873	Rab5c
ENSMUSG00000019179	3953.45	0.139869	0.070631	1.98027	0.0476729	0.267618	Mdh2
ENSMUSG00000019188	1336.59	-0.0329724	0.0764165	-0.431483	0.666117	0.877658	H13
ENSMUSG00000019189	1081.01	-0.0346539	0.0818834	-0.423211	0.672142	0.879321	Rnf145
ENSMUSG00000019194	11.5933	-2.88107	0.837026	-3.44204	0.000577353		Scn1b
ENSMUSG00000019210	848.982	0.0341701	0.0951343	0.359177	0.719462	0.899714	Atp6v1e1
ENSMUSG00000019214	413.549	-0.00362288	0.266076	-0.013616	0.989136	0.996368	Chtf18
ENSMUSG00000019230	12.3869	0.418542	0.52305	0.800195	0.423598		Lhx9
ENSMUSG00000019254	581.301	-0.112578	0.142245	-0.791435	0.42869	0.753238	Ppp1r12c
ENSMUSG00000019256	103.287	-0.413197	0.201267	-2.05298	0.0400743	0.244763	Ahr
ENSMUSG00000019261	846.946	0.0220273	0.140681	0.156576	0.875579	0.958523	Map1s
ENSMUSG00000019278	24.3402	0.377467	0.508089	0.742915	0.457533		Dpep1
ENSMUSG00000019295	278.788	0.0971442	0.116153	0.836349	0.402959	0.734362	Tmem129
ENSMUSG00000019297	603.646	0.091892	0.0815656	1.1266	0.259911	0.61328	Nop9
ENSMUSG00000019302	327.643	-0.295751	0.178987	-1.65236	0.0984611	0.391327	Atp6v0a1
ENSMUSG00000019303	131.078	-0.127401	0.158255	-0.805036	0.420799	0.747173	Psmc3ip
ENSMUSG00000019326	16.0645	0.200732	0.453194	0.442928	0.657818		Aoc3
ENSMUSG00000019338	524.23	-0.184658	0.181397	-1.01798	0.308688	0.654307	Zfp687
ENSMUSG00000019362	879.53	0.0452258	0.104252	0.433813	0.664424	0.877504	D8Ertd738e
ENSMUSG00000019370	3295.81	-0.131312	0.0735099	-1.78632	0.0740474	0.335002	Calm3
ENSMUSG00000019373	806.554	-0.0338653	0.0907546	-0.373152	0.709035	0.894578	Cops3
ENSMUSG00000019428	1797.08	-0.0615001	0.0921364	-0.66749	0.504459	0.798365	Fkbp8
ENSMUSG00000019432	2694.13	-0.0609193	0.0595976	-1.02218	0.306697	0.653248	Ddx39b
ENSMUSG00000019433	778.953	-0.102536	0.104195	-0.98408	0.325076	0.670775	Gipc1
ENSMUSG00000019437	69.1119	-0.0997013	0.328084	-0.30389	0.761212	0.915354	Tlcd1
ENSMUSG00000019461	539.298	-0.0867309	0.0990682	-0.875467	0.38132	0.714978	Plscr3
ENSMUSG00000019464	11.6535	-0.704961	0.522728	-1.34862	0.177459		Ptger1
ENSMUSG00000019467	421.582	-0.149442	0.130539	-1.14481	0.252286	0.604858	Arhgef25
ENSMUSG00000019470	484.878	-0.00627359	0.0819619	-0.0765427	0.938987	0.978903	Xab2
ENSMUSG00000019471	1620.88	0.0885045	0.0609444	1.45222	0.146441	0.46984	Cdc37
ENSMUSG00000019478	159.854	0.392826	0.151804	2.58772	0.00966145	0.108402	Rab4a
ENSMUSG00000019487	33.5661	1.16443	1.36839	0.85095	0.394797		Trip10
ENSMUSG00000019494	1241.36	-0.0268882	0.0609778	-0.440951	0.659248	0.875546	Cops6
ENSMUSG00000019505	8304.84	0.0223286	0.0943288	0.23671	0.812882	0.934774	Ubb
ENSMUSG00000019518	294.611	-0.307668	0.170761	-1.80175	0.0715848	0.329549	Ap4m1
ENSMUSG00000019528	363.553	-0.0688207	0.0955855	-0.719991	0.471531	0.780593	Gyg
ENSMUSG00000019539	437.155	-0.192307	0.281882	-0.682226	0.495096	0.793438	Rcn3
ENSMUSG00000019558	2172.21	0.180474	0.156279	1.15482	0.248164	0.599161	Slc6a8
ENSMUSG00000019564	163.365	0.194579	0.213016	0.913446	0.361008	0.702071	Arid3a
ENSMUSG00000019577	6.62573	1.47294	0.774608	1.90152	0.0572333		Pdk4
ENSMUSG00000019578	359.84	0.0792495	0.151331	0.523682	0.6005	0.847474	Ubxn6
ENSMUSG00000019579	658.575	0.0776001	0.0971652	0.798641	0.424499	0.749669	Mydgf
ENSMUSG00000019590	57.8233	-0.256989	0.305985	-0.839873	0.40098	0.732773	Cyb561
ENSMUSG00000019647	13.0114	0.178789	0.590107	0.302976	0.761908		Sema6a
ENSMUSG00000019659	261.369	0.0679948	0.145918	0.465981	0.641229	0.867148	Ccdc12
ENSMUSG00000019689	60.6481	-0.170069	0.226847	-0.749707	0.453431	0.76874	Fmc1
ENSMUSG00000019699	516.023	0.138294	0.165981	0.833189	0.404738	0.735596	Akt3
ENSMUSG00000019710	308.975	-0.0938676	0.1432	-0.655502	0.512145	0.802175	Mrpl24
ENSMUSG00000019715	469.491	-0.271805	0.0932367	-2.91522	0.00355441	0.0589628	Gle1
ENSMUSG00000019718	82.5281	-0.625962	0.228001	-2.74543	0.00604312	0.0812682	L3hypdh
ENSMUSG00000019726	131.492	-0.0920122	0.199938	-0.460204	0.64537	0.869211	Lyst
ENSMUSG00000019731	881.598	-0.106069	0.079016	-1.34238	0.179473	0.518558	Slc35e1
ENSMUSG00000019732	56.4882	0.830087	0.338857	2.44967	0.0142988	0.138923	Calr3
ENSMUSG00000019734	24.6638	-0.35655	0.406414	-0.877307	0.38032		Tmc4
ENSMUSG00000019738	174.607	-0.263942	0.176938	-1.49172	0.135772	0.456815	Polr2i
ENSMUSG00000019756	37.9139	-0.0878124	0.337594	-0.260113	0.794777		Prl8a1
ENSMUSG00000019761	7.14809	0.105057	0.65659	0.160004	0.872878		Krt10
ENSMUSG00000019763	126.807	-0.183286	0.164255	-1.11587	0.26448	0.617803	Rmnd1
ENSMUSG00000019768	85.9962	0.133749	0.220854	0.605597	0.544783	0.821588	Esr1
ENSMUSG00000019773	430.367	-0.010719	0.129525	-0.0827563	0.934045	0.977345	Fbxo5
ENSMUSG00000019774	81.4899	-0.0389046	0.250335	-0.15541	0.876498	0.958638	Mtrf1l
ENSMUSG00000019775	263.651	-0.271484	0.204295	-1.32888	0.183887	0.523576	Rgs17
ENSMUSG00000019777	1732.2	0.0491161	0.0728783	0.673947	0.500345	0.796174	Hdac2
ENSMUSG00000019779	189.821	0.230005	0.131694	1.74652	0.0807214	0.350289	Frk
ENSMUSG00000019782	771.377	-0.0124061	0.0981672	-0.126377	0.899434	0.964372	Rwdd1
ENSMUSG00000019790	423.136	0.0902952	0.132492	0.681513	0.495547	0.793765	Stxbp5
ENSMUSG00000019791	15.6121	-0.31859	0.420846	-0.757023	0.449036		Hint3
ENSMUSG00000019792	78.9322	-0.0302639	0.206032	-0.14689	0.883219	0.960261	Trmt11
ENSMUSG00000019794	299.998	0.0588376	0.123368	0.476927	0.633414	0.862655	Katna1
ENSMUSG00000019795	903.784	0.132408	0.0860849	1.53811	0.124022	0.437848	Pcmt1
ENSMUSG00000019796	148.588	0.353812	0.2297	1.54032	0.123483	0.436904	Lrp11
ENSMUSG00000019797	132.894	-0.255754	0.174333	-1.46705	0.142364	0.465592	1700021F05Rik
ENSMUSG00000019802	1582.06	0.187934	0.0960583	1.95645	0.0504116	0.274656	Sec63
ENSMUSG00000019804	1306.34	0.0175427	0.0911718	0.192413	0.847418	0.94796	Snx3
ENSMUSG00000019806	405.462	-0.29934	0.140745	-2.12682	0.0334346	0.223278	Aig1
ENSMUSG00000019808	76.0562	0.149694	0.202222	0.740243	0.459153	0.772171	Adat2
ENSMUSG00000019809	194.221	0.161484	0.148659	1.08627	0.277359	0.629785	Pex3
ENSMUSG00000019810	135.085	0.107761	0.193996	0.55548	0.578566	0.838253	Fuca2
ENSMUSG00000019813	100.283	-0.106816	0.181792	-0.58757	0.556821	0.827541	Cep57l1
ENSMUSG00000019814	586.065	0.175102	0.0937406	1.86794	0.0617706	0.304524	Ltv1
ENSMUSG00000019817	97.7	0.0172691	0.286906	0.0601907	0.952004	0.983156	Plagl1
ENSMUSG00000019818	2875.74	0.0440814	0.103691	0.425123	0.670747	0.879321	Cd164
ENSMUSG00000019820	389.361	0.42568	0.213971	1.98942	0.0466543	0.265545	Utrn
ENSMUSG00000019822	109.059	-0.346895	0.177696	-1.95219	0.0509162	0.275608	Smpd2
ENSMUSG00000019823	128.651	-0.518329	0.266681	-1.94363	0.0519404	0.276728	Mical1
ENSMUSG00000019826	66.5119	-0.0551704	0.24749	-0.222919	0.823598	0.939223	Zbtb24
ENSMUSG00000019831	168.292	0.133356	0.124665	1.06971	0.284748	0.635426	Wasf1
ENSMUSG00000019832	367.543	-0.442461	0.12873	-3.43711	0.000587951	0.0189544	Rab32
ENSMUSG00000019837	116.835	0.686835	0.305146	2.25084	0.0243957	0.18765	Gtf3c6
ENSMUSG00000019838	188.234	-0.183184	0.135389	-1.35302	0.176049	0.513548	Slc16a10
ENSMUSG00000019841	320.045	-0.093197	0.195525	-0.476651	0.63361	0.862655	Rev3l
ENSMUSG00000019842	188.807	-0.278035	0.228409	-1.21727	0.223503	0.573976	Traf3ip2
ENSMUSG00000019843	722.054	-0.185976	0.0941132	-1.97608	0.0481453	0.268996	Fyn
ENSMUSG00000019845	44.9011	-0.262629	0.291335	-0.901465	0.367341		Tube1
ENSMUSG00000019846	491.421	-0.593787	0.319682	-1.85743	0.0632499	0.308812	Lama4
ENSMUSG00000019849	1795.23	0.089079	0.073607	1.2102	0.226203	0.576757	Prep
ENSMUSG00000019850	109.471	0.382657	0.171689	2.22878	0.0258283	0.193271	Tnfaip3
ENSMUSG00000019853	93.8998	0.0826096	0.183944	0.449102	0.653358	0.873364	Hebp2
ENSMUSG00000019854	769.337	0.185329	0.110902	1.6711	0.0947016	0.382788	Reps1
ENSMUSG00000019857	136.082	0.250517	0.166354	1.50592	0.132087	0.451437	Asf1a
ENSMUSG00000019861	279.854	-0.174885	0.221919	-0.788055	0.430665	0.754133	Gopc
ENSMUSG00000019863	89.0348	-0.054385	0.235259	-0.231171	0.817182	0.935706	Qrsl1
ENSMUSG00000019864	65.6246	0.154861	0.217118	0.713258	0.475686	0.782238	Rtn4ip1
ENSMUSG00000019868	450.275	-0.0191323	0.108364	-0.176555	0.859858	0.953137	Vta1
ENSMUSG00000019872	7.94781	0.438404	0.704056	0.622683	0.533493		Smpdl3a
ENSMUSG00000019873	1225.11	0.0698938	0.08869	0.788068	0.430657	0.754133	Reep3
ENSMUSG00000019876	5.00598	0.150518	0.66948	0.224828	0.822113		Pkib
ENSMUSG00000019877	1439.98	0.162254	0.0879368	1.84513	0.0650193	0.314271	Serinc1
ENSMUSG00000019878	170.479	0.321504	0.15855	2.02777	0.0425836	0.25236	Hsf2
ENSMUSG00000019883	192.91	-0.103523	0.236268	-0.438159	0.661271	0.876756	Echdc1
ENSMUSG00000019889	229.964	0.362644	0.173357	2.09189	0.0364479	0.233723	Ptprk
ENSMUSG00000019891	115.013	0.125702	0.19304	0.651172	0.514935	0.803297	Dcbld1
ENSMUSG00000019894	294.216	0.216134	0.139599	1.54825	0.121563	0.432812	Slc6a15
ENSMUSG00000019897	279.98	0.0532289	0.158455	0.335923	0.736929	0.906859	Ccdc59
ENSMUSG00000019899	28.1493	0.08722	0.419852	0.20774	0.835432		Lama2
ENSMUSG00000019907	154.707	0.814687	0.294795	2.76357	0.00571736	0.0791723	Ppp1r12a
ENSMUSG00000019916	2508.45	-0.0971353	0.0592219	-1.64019	0.100966	0.397412	P4ha1
ENSMUSG00000019917	445.536	-0.0882537	0.121522	-0.726239	0.467692	0.778308	Sept10
ENSMUSG00000019920	1107.52	0.234665	0.0659026	3.56078	0.000369754	0.013654	Lims1
ENSMUSG00000019923	2342.56	0.157618	0.0791667	1.99097	0.0464843	0.265522	Zwint
ENSMUSG00000019927	260.895	-0.128991	0.199508	-0.646544	0.517927	0.804866	Ube2d1
ENSMUSG00000019929	4583.07	-0.425045	0.169946	-2.50106	0.0123823	0.126688	Dcn
ENSMUSG00000019942	1830.07	0.0349891	0.0822005	0.425655	0.670359	0.879321	Cdk1
ENSMUSG00000019943	1184.37	-0.0530064	0.134241	-0.394861	0.692946	0.888671	Atp2b1
ENSMUSG00000019944	66.0698	0.169674	0.347841	0.487791	0.625698	0.858064	Rhobtb1
ENSMUSG00000019948	82.1019	0.141345	0.214108	0.660158	0.509153	0.800655	Actr6
ENSMUSG00000019951	1222.83	0.0250422	0.103751	0.241367	0.809271	0.932427	Uhrf1bp1l
ENSMUSG00000019952	234.215	-0.0690755	0.159537	-0.432976	0.665032	0.877544	Poc1b
ENSMUSG00000019960	841.202	-0.127599	0.156316	-0.816291	0.414334	0.743592	Dusp6
ENSMUSG00000019961	2444.57	-0.0699195	0.0774251	-0.903061	0.366494	0.705254	Tmpo
ENSMUSG00000019966	871.461	-0.443567	0.172844	-2.56629	0.0102793	0.112967	Kitl
ENSMUSG00000019969	564.618	0.153068	0.0832432	1.83881	0.0659431	0.316125	Psen1
ENSMUSG00000019970	2179.63	-0.32488	0.142584	-2.27851	0.022696	0.178965	Sgk1
ENSMUSG00000019975	627.336	-0.111706	0.0989002	-1.12949	0.258693	0.611689	Ikbip
ENSMUSG00000019977	461.507	-0.263167	0.169753	-1.55029	0.121071	0.432261	Hbs1l
ENSMUSG00000019978	1447.01	0.0484857	0.13501	0.359127	0.7195	0.899714	Epb41l2
ENSMUSG00000019979	492.839	-0.00225497	0.117205	-0.0192395	0.98465	0.994453	Apaf1
ENSMUSG00000019982	11.5204	0.123882	0.536616	0.230858	0.817425		Myb
ENSMUSG00000019984	277.765	0.05709	0.172333	0.331276	0.740436	0.908062	Med23
ENSMUSG00000019986	110.156	-0.412469	0.196354	-2.10064	0.0356724	0.230957	Ahi1
ENSMUSG00000019988	519.061	-0.0179581	0.100774	-0.178201	0.858565	0.95305	Nedd1
ENSMUSG00000019989	12.5995	1.21928	0.800754	1.52266	0.127844		Enpp3
ENSMUSG00000019990	4.27808	0.266636	0.819875	0.325215	0.745018		Pde7b
ENSMUSG00000019992	139.391	-0.076006	0.173317	-0.438537	0.660997	0.876703	Mtfr2
ENSMUSG00000019997	2483.41	0.751932	0.32288	2.32883	0.0198681	0.166802	Ccn2
ENSMUSG00000019998	540.633	0.195378	0.0818459	2.38715	0.0169797	0.152801	Stx7
ENSMUSG00000020003	117.65	0.141252	0.169799	0.831873	0.405481	0.735691	Pex7
ENSMUSG00000020009	318.968	-0.0870686	0.11128	-0.782428	0.433963	0.757294	Ifngr1
ENSMUSG00000020015	462.507	0.00173939	0.0892922	0.0194797	0.984458	0.994453	Cdk17
ENSMUSG00000020018	617.667	0.117095	0.0921381	1.27087	0.203776	0.550122	Snrpf
ENSMUSG00000020019	111.69	-0.174218	0.21951	-0.793667	0.427389	0.752636	Ntn4
ENSMUSG00000020021	229.995	-0.294777	0.282085	-1.04499	0.296027	0.643461	Fgd6
ENSMUSG00000020022	565.366	0.0631164	0.111605	0.565533	0.571712	0.834493	Ndufa12
ENSMUSG00000020023	344.099	0.844686	0.28617	2.9517	0.00316032	0.0554811	Tmcc3
ENSMUSG00000020024	242.695	0.0797143	0.128025	0.622649	0.533515	0.815934	Cep83
ENSMUSG00000020027	44.7707	-0.546459	0.366665	-1.49035	0.136133		Socs2
ENSMUSG00000020029	1925.02	-0.212947	0.0702669	-3.03055	0.00244109	0.0472434	Nudt4
ENSMUSG00000020032	189.91	0.654878	0.249394	2.62587	0.00864267	0.101707	Nuak1
ENSMUSG00000020034	33.1129	-0.0323076	0.345119	-0.093613	0.925417		Tcp11l2
ENSMUSG00000020038	313.586	0.190349	0.0995359	1.91237	0.0558293	0.287591	Cry1
ENSMUSG00000020042	376.859	0.107459	0.150354	0.714709	0.474789	0.781915	Btbd11
ENSMUSG00000020044	995.493	-0.33899	0.161893	-2.09392	0.036267	0.233028	Timp3
ENSMUSG00000020048	11569.4	0.0735737	0.0617012	1.19242	0.233097	0.584151	Hsp90b1
ENSMUSG00000020053	22.0718	-0.0822456	0.586116	-0.140323	0.888405		Igf1
ENSMUSG00000020056	143.797	-0.159169	0.151673	-1.04942	0.293985	0.643013	Washc3
ENSMUSG00000020057	153.323	-0.844132	0.215767	-3.91224	9.14439e-05	0.00530042	Dram1
ENSMUSG00000020063	271.101	0.144126	0.140237	1.02773	0.304078	0.650656	Sirt1
ENSMUSG00000020064	353.105	0.0833285	0.210831	0.395238	0.692667	0.888584	Herc4
ENSMUSG00000020069	252.09	-0.129541	0.120598	-1.07415	0.282755	0.63347	Hnrnph3
ENSMUSG00000020070	164.681	0.0336694	0.232224	0.144987	0.884721	0.960261	Rufy2
ENSMUSG00000020072	19.5729	0.387475	0.485887	0.797461	0.425184		Pbld2
ENSMUSG00000020074	526.025	0.225742	0.155789	1.44902	0.147332	0.471131	Ccar1
ENSMUSG00000020075	4274.24	0.218549	0.0715513	3.05444	0.00225483	0.0449072	Ddx21
ENSMUSG00000020076	443.765	-0.0441612	0.151256	-0.291962	0.770315	0.918185	Ddx50
ENSMUSG00000020077	5.24289	-0.59813	0.864393	-0.691965	0.488959		Srgn
ENSMUSG00000020078	1228.66	0.191509	0.106104	1.80492	0.071087	0.328445	Vps26a
ENSMUSG00000020079	293.561	0.152306	0.161495	0.943101	0.345629	0.689827	Supv3l1
ENSMUSG00000020085	115.817	0.107504	0.167745	0.640876	0.521604	0.808494	Aifm2
ENSMUSG00000020086	228.747	-0.469953	0.157744	-2.97921	0.00288992	0.0523533	H2afy2
ENSMUSG00000020087	234.54	-0.333243	0.148313	-2.24689	0.024647	0.188864	Tysnd1
ENSMUSG00000020088	1627.69	0.0424154	0.0824428	0.514482	0.606915	0.850086	Sar1a
ENSMUSG00000020089	1584.42	0.196695	0.0664735	2.959	0.00308635	0.0546806	Ppa1
ENSMUSG00000020091	1671.3	-0.209755	0.0888372	-2.36111	0.0182201	0.159932	Eif4ebp2
ENSMUSG00000020092	167.228	0.000264039	0.145393	0.00181603	0.998551	0.99992	Pald1
ENSMUSG00000020097	986.653	0.0808064	0.11362	0.711201	0.47696	0.782631	Sgpl1
ENSMUSG00000020099	992.445	-0.0856491	0.206404	-0.414959	0.678172	0.881467	Unc5b
ENSMUSG00000020100	153.041	-0.0212583	0.190698	-0.111476	0.911239	0.96863	Slc29a3
ENSMUSG00000020102	6.31978	1.08687	0.989344	1.09858	0.271951		Slc16a7
ENSMUSG00000020105	208.441	0.328066	0.154306	2.12607	0.0334974	0.223424	Lrig3
ENSMUSG00000020107	440	-0.0741258	0.111204	-0.666572	0.505046	0.798365	Anapc16
ENSMUSG00000020108	418.348	-0.497019	0.135389	-3.67103	0.000241572	0.00994988	Ddit4
ENSMUSG00000020109	499.756	0.0940028	0.117334	0.801152	0.423044	0.74857	Dnajb12
ENSMUSG00000020111	921.533	0.0229839	0.117931	0.194892	0.845477	0.947401	Micu1
ENSMUSG00000020114	2421.99	0.0215195	0.145355	0.148048	0.882305	0.960178	Cand1
ENSMUSG00000020115	357.571	-0.158209	0.10393	-1.52226	0.127944	0.443898	Tbk1
ENSMUSG00000020116	733.628	0.296443	0.0818476	3.62189	0.000292457	0.0114118	Pno1
ENSMUSG00000020120	11.2025	0.802332	0.683569	1.17374	0.240499		Plek
ENSMUSG00000020121	42.5128	-0.228198	0.303743	-0.751288	0.452479		Srgap1
ENSMUSG00000020122	89.6317	1.04925	0.391607	2.67934	0.00737685	0.0931098	Egfr
ENSMUSG00000020124	102.533	0.41814	0.285682	1.46366	0.143288	0.466457	Usp15
ENSMUSG00000020128	464.331	-0.129784	0.119151	-1.08924	0.276048	0.628968	Vps54
ENSMUSG00000020130	491.243	0.154964	0.0975321	1.58885	0.112094	0.417064	Tbc1d15
ENSMUSG00000020131	48.5448	0.245876	0.303775	0.809402	0.418284		Pcsk4
ENSMUSG00000020132	1330.24	0.0642032	0.082184	0.781213	0.434677	0.758129	Rab21
ENSMUSG00000020133	263.765	-0.251836	0.127489	-1.97536	0.0482278	0.268996	2310011J03Rik
ENSMUSG00000020134	262.275	0.0424894	0.118292	0.359189	0.719453	0.899714	Peli1
ENSMUSG00000020142	318.752	0.156397	0.14096	1.10952	0.267208	0.621015	Slc1a4
ENSMUSG00000020149	2292.56	0.0336691	0.0738506	0.455908	0.648456	0.870813	Rab1a
ENSMUSG00000020150	83.7951	-0.101834	0.219587	-0.463754	0.642824	0.868194	Gamt
ENSMUSG00000020152	3066.82	0.416184	0.0647903	6.42356	1.33127e-10	6.75302e-08	Actr2
ENSMUSG00000020153	384.89	-0.385586	0.147228	-2.61897	0.00881957	0.103034	Ndufs7
ENSMUSG00000020156	617.592	-0.39005	0.210978	-1.84877	0.0644906	0.312814	Pwwp3a
ENSMUSG00000020160	26.9896	-0.173876	0.40386	-0.430535	0.666807		Meis1
ENSMUSG00000020163	400.427	-0.0380621	0.115623	-0.32919	0.742012	0.90847	Uqcr11
ENSMUSG00000020166	736.294	0.179275	0.102513	1.74879	0.0803265	0.349047	Cnot2
ENSMUSG00000020167	1372.23	-0.178523	0.100881	-1.76965	0.0767855	0.341289	Tcf3
ENSMUSG00000020170	624.371	0.368769	0.0981446	3.75741	0.000171682	0.00787938	Frs2
ENSMUSG00000020171	267.032	-0.570395	0.130741	-4.36278	1.28422e-05	0.00121346	Yeats4
ENSMUSG00000020173	13.6799	-1.26722	0.691275	-1.83316	0.0667781		Cobl
ENSMUSG00000020175	26.9687	-0.999326	0.346221	-2.88639	0.00389694		Rab36
ENSMUSG00000020176	2051.84	-0.0894416	0.123705	-0.723025	0.469665	0.779512	Grb10
ENSMUSG00000020180	898.613	-0.022892	0.0834537	-0.274309	0.783848	0.92334	Snrpd3
ENSMUSG00000020181	375.082	0.0428025	0.202871	0.210983	0.8329	0.942089	Nav3
ENSMUSG00000020184	746.975	0.0978732	0.125899	0.777397	0.436925	0.759301	Mdm2
ENSMUSG00000020185	504.571	-0.16959	0.161699	-1.0488	0.29427	0.643013	E2f7
ENSMUSG00000020186	33.7163	-0.331684	0.349365	-0.949392	0.342421		Csrp2
ENSMUSG00000020189	372.803	0.0593046	0.108751	0.545327	0.585529	0.841256	Osbpl8
ENSMUSG00000020190	772.523	0.202531	0.162118	1.24928	0.211561	0.560173	Mknk2
ENSMUSG00000020191	5.75067	-0.44459	0.905219	-0.491141	0.623327		Spata48
ENSMUSG00000020196	582.771	0.0787867	0.088988	0.885363	0.375961	0.712635	Cabin1
ENSMUSG00000020198	1644.93	0.223285	0.0683645	3.26609	0.00109045	0.0276145	Ap3d1
ENSMUSG00000020205	1455.33	-0.0655992	0.137557	-0.476888	0.633442	0.862655	Phlda1
ENSMUSG00000020211	983.554	-0.0269027	0.0965758	-0.278565	0.780579	0.92185	Sf3a2
ENSMUSG00000020212	118.548	-0.416253	0.179443	-2.31969	0.0203578	0.16973	Mdm1
ENSMUSG00000020219	366.09	0.103216	0.133788	0.771487	0.440418	0.76122	Timm13
ENSMUSG00000020220	236.449	-0.0383052	0.323121	-0.118548	0.905634	0.965707	Vps13d
ENSMUSG00000020224	390.688	0.18423	0.106371	1.73195	0.0832826	0.357063	Llph
ENSMUSG00000020225	306.455	0.233616	0.133183	1.7541	0.0794137	0.347801	Tmbim4
ENSMUSG00000020227	127.551	-0.65098	0.265242	-2.45429	0.0141163	0.137845	Irak3
ENSMUSG00000020228	171.823	-0.0259453	0.142702	-0.181814	0.855728	0.951635	Helb
ENSMUSG00000020230	348.715	0.118213	0.124837	0.946936	0.343671	0.687681	Prmt2
ENSMUSG00000020231	1059.35	0.121585	0.180006	0.675449	0.499391	0.796084	Dip2a
ENSMUSG00000020232	360.408	-0.222032	0.149475	-1.48541	0.137436	0.458225	Hmg20b
ENSMUSG00000020235	850.788	-0.117793	0.0839644	-1.4029	0.160647	0.491529	Fzr1
ENSMUSG00000020238	1293.78	0.0809269	0.0973161	0.831588	0.405641	0.735709	Ncln
ENSMUSG00000020241	509.718	-0.581915	0.245663	-2.36875	0.0178482	0.157899	Col6a2
ENSMUSG00000020246	244.864	0.388581	0.212262	1.83066	0.0671508	0.318034	Hcfc2
ENSMUSG00000020248	238.067	-0.213287	0.145965	-1.46122	0.143954	0.467224	Nfyb
ENSMUSG00000020250	2510.35	0.228422	0.0831885	2.74584	0.00603571	0.0812682	Txnrd1
ENSMUSG00000020251	24.6161	-0.139742	0.352938	-0.395939	0.69215		Glt8d2
ENSMUSG00000020253	297.206	-0.142746	0.107847	-1.3236	0.185636	0.526379	Ppm1m
ENSMUSG00000020255	1033.16	-0.0413703	0.0914819	-0.452223	0.651108	0.872307	D10Wsu102e
ENSMUSG00000020256	207.513	0.00844689	0.153122	0.0551643	0.956008	0.983954	Aldh1l2
ENSMUSG00000020257	1273.18	-0.153929	0.141471	-1.08806	0.276568	0.628968	Wdr82
ENSMUSG00000020258	24.2393	0.00151489	0.331694	0.00456715	0.996356		Glyctk
ENSMUSG00000020260	735.344	-0.00664158	0.074793	-0.0887996	0.929241	0.974787	Pofut2
ENSMUSG00000020261	161.778	0.075191	0.188585	0.398712	0.690105	0.887305	Slc36a1
ENSMUSG00000020262	138.405	-0.333476	0.441972	-0.754518	0.450538	0.767287	Adarb1
ENSMUSG00000020263	282.944	-0.40585	0.213001	-1.90539	0.0567297	0.290181	Appl2
ENSMUSG00000020265	1352.52	0.016483	0.113449	0.14529	0.884482	0.960261	Sumo3
ENSMUSG00000020267	1814.12	-0.088184	0.122977	-0.717077	0.473327	0.781232	Hint1
ENSMUSG00000020268	31.3158	-1.11879	0.612854	-1.82555	0.0679181		Lyrm7
ENSMUSG00000020271	1239.92	-0.0608206	0.130237	-0.467001	0.640499	0.866571	Fbxw11
ENSMUSG00000020272	256.716	0.39283	0.175913	2.23309	0.0255427	0.191879	Stk10
ENSMUSG00000020273	122.883	0.13824	0.229697	0.601835	0.547284	0.822447	Papolg
ENSMUSG00000020275	136.526	0.00061856	0.152134	0.00406589	0.996756	0.99992	Rel
ENSMUSG00000020277	2633.33	0.0507216	0.0956045	0.530536	0.59574	0.845618	Pfkl
ENSMUSG00000020280	401.49	0.0506931	0.0925063	0.547996	0.583694	0.840286	Pus10
ENSMUSG00000020282	651.096	-0.38577	0.115802	-3.33129	0.000864448	0.0245046	Rhbdf1
ENSMUSG00000020283	259.98	-0.0326143	0.244161	-0.133577	0.893737	0.963996	Pex13
ENSMUSG00000020284	122.486	0.0372496	0.179296	0.207755	0.835421	0.943349	Cfap410
ENSMUSG00000020287	228.718	-0.289843	0.150008	-1.93218	0.0533367	0.279517	Mpg
ENSMUSG00000020288	455.995	-0.0754754	0.149046	-0.50639	0.612583	0.852583	Ahsa2
ENSMUSG00000020289	261.604	-0.156151	0.133867	-1.16646	0.243428	0.593814	Nprl3
ENSMUSG00000020290	3452.63	0.226628	0.0816307	2.77626	0.00549887	0.0769203	Xpo1
ENSMUSG00000020300	244.467	0.540204	0.143648	3.76061	0.000169502	0.00781657	Cpeb4
ENSMUSG00000020303	115.003	-0.0239027	0.242041	-0.0987548	0.921333	0.970896	Stc2
ENSMUSG00000020305	35.7985	0.231577	0.273894	0.845499	0.397832		Asb3
ENSMUSG00000020307	851.906	0.250591	0.117234	2.13754	0.0325543	0.220287	Cdc34
ENSMUSG00000020308	216.612	-0.328152	0.1827	-1.79613	0.0724743	0.33136	Tpgs1
ENSMUSG00000020309	50.4582	0.330776	0.289124	1.14407	0.252596		Chac2
ENSMUSG00000020311	214.509	-0.0317625	0.149099	-0.21303	0.831304	0.941415	Erlec1
ENSMUSG00000020312	89.713	-0.154769	0.252538	-0.612855	0.539972	0.819955	Shc2
ENSMUSG00000020315	3358.97	0.0586946	0.105176	0.558059	0.576804	0.83736	Sptbn1
ENSMUSG00000020319	54.7628	-0.198561	0.322807	-0.615107	0.538484	0.818571	Wdpcp
ENSMUSG00000020321	1359.89	0.0923614	0.0775077	1.19164	0.233402	0.584444	Mdh1
ENSMUSG00000020325	37.1689	0.488618	0.295446	1.65383	0.0981618		Fstl3
ENSMUSG00000020326	428.972	0.0821356	0.0998309	0.822747	0.410652	0.740203	Ccng1
ENSMUSG00000020328	610.532	-0.0300103	0.112816	-0.26601	0.790231	0.925762	Nudcd2
ENSMUSG00000020329	359.969	-0.220262	0.190437	-1.15662	0.24743	0.598877	Polrmt
ENSMUSG00000020330	946.082	0.100516	0.103892	0.967513	0.333288	0.677828	Hmmr
ENSMUSG00000020331	6.93483	0.169763	0.653099	0.259935	0.794914		Hcn2
ENSMUSG00000020333	326.687	0.189498	0.172684	1.09737	0.27248	0.625681	Acsl6
ENSMUSG00000020334	45.6543	0.137347	0.302118	0.454612	0.649389		Slc22a4
ENSMUSG00000020340	16.521	0.250184	0.437943	0.57127	0.567817		Cyfip2
ENSMUSG00000020346	891.334	-0.101174	0.108733	-0.930479	0.352123	0.694731	Mgat1
ENSMUSG00000020349	3177.54	0.024034	0.0538489	0.446322	0.655365	0.874716	Ppp2ca
ENSMUSG00000020354	59.1543	-0.181824	0.212226	-0.856744	0.391586	0.724278	Sgcd
ENSMUSG00000020357	22.2177	0.873078	0.38241	2.28309	0.0224249		Flt4
ENSMUSG00000020358	9011.83	-0.0204588	0.068986	-0.296565	0.766799	0.917598	Hnrnpab
ENSMUSG00000020359	128.561	0.260499	0.152105	1.71263	0.0867809	0.365238	Phykpl
ENSMUSG00000020361	5471.28	0.116417	0.0459888	2.53142	0.0113603	0.119662	Hspa4
ENSMUSG00000020362	1359.5	-0.088332	0.129176	-0.683813	0.494093	0.792754	Cnot6
ENSMUSG00000020363	98.7058	-0.413794	0.384135	-1.07721	0.281386	0.6321	Gfpt2
ENSMUSG00000020364	24.7871	0.153783	0.376722	0.408214	0.683116		Zfp354a
ENSMUSG00000020366	547.405	0.0988852	0.118566	0.834012	0.404274	0.735523	Mapk9
ENSMUSG00000020368	8109.7	0.203986	0.0589189	3.46215	0.000535884	0.0178715	Canx
ENSMUSG00000020372	11266.5	-0.0400893	0.0738371	-0.542942	0.58717	0.841633	Rack1
ENSMUSG00000020375	371.296	-0.206444	0.105626	-1.95448	0.050644	0.275159	Rufy1
ENSMUSG00000020376	345.813	-0.159042	0.117854	-1.34947	0.177185	0.514808	Rnf130
ENSMUSG00000020380	745.593	-0.0337303	0.108414	-0.311126	0.755705	0.915051	Rad50
ENSMUSG00000020381	30.7396	-0.107775	0.349542	-0.308331	0.75783		Mrnip
ENSMUSG00000020385	301.683	0.00640596	0.109763	0.0583617	0.953461	0.983496	Clk4
ENSMUSG00000020386	301.733	-0.059705	0.120881	-0.493916	0.621366	0.855523	Sar1b
ENSMUSG00000020387	331.753	0.0889759	0.135897	0.654733	0.51264	0.802175	Jade2
ENSMUSG00000020388	88.475	-0.337662	0.396777	-0.851012	0.394763	0.726786	Pdlim4
ENSMUSG00000020389	37.9985	0.203235	0.324071	0.627131	0.530574		Cdkl3
ENSMUSG00000020390	745.125	-0.0108372	0.0790669	-0.137064	0.89098	0.96367	Ube2b
ENSMUSG00000020392	561.777	0.219384	0.131729	1.66542	0.0958294	0.385342	Cdkn2aipnl
ENSMUSG00000020393	363.33	0.0182291	0.11781	0.154733	0.877032	0.958876	Kremen1
ENSMUSG00000020397	231.126	-0.0915064	0.131123	-0.697865	0.485262	0.787763	Med7
ENSMUSG00000020399	24.6207	0.569921	0.485198	1.17462	0.240149		Havcr2
ENSMUSG00000020400	386.603	0.0869437	0.142693	0.609305	0.542322	0.820359	Tnip1
ENSMUSG00000020402	3106.06	0.150972	0.0559323	2.69919	0.00695086	0.0899227	Vdac1
ENSMUSG00000020407	369.551	-0.396912	0.162215	-2.44683	0.014412	0.13932	Upp1
ENSMUSG00000020409	438.354	0.147566	0.127673	1.15581	0.24776	0.599074	Slu7
ENSMUSG00000020412	566.217	-0.0364393	0.0769881	-0.473311	0.635991	0.863944	Ascc2
ENSMUSG00000020413	284.555	-0.155301	0.161718	-0.960323	0.336892	0.681532	Hus1
ENSMUSG00000020415	128.587	-0.312525	0.192928	-1.6199	0.105253	0.406096	Pttg1
ENSMUSG00000020422	3348.89	0.312682	0.118968	2.62827	0.00858195	0.101355	Tns3
ENSMUSG00000020423	53.4881	0.086076	0.257543	0.33422	0.738214	0.90743	Btg2
ENSMUSG00000020424	68.9986	0.426863	0.226985	1.88058	0.0600296	0.300242	Castor1
ENSMUSG00000020427	259.171	-0.370102	0.223223	-1.65799	0.097319	0.388601	Igfbp3
ENSMUSG00000020430	1444.9	0.251595	0.0897978	2.80179	0.00508198	0.0734334	Pes1
ENSMUSG00000020431	83.9171	-0.0469884	0.326749	-0.143806	0.885654	0.960712	Adcy1
ENSMUSG00000020432	38.363	0.535385	0.297507	1.79957	0.0719287		Tcn2
ENSMUSG00000020434	19.2028	-0.203454	0.493384	-0.412364	0.680073		4921536K21Rik
ENSMUSG00000020439	1303.58	0.153942	0.143587	1.07212	0.283668	0.634506	Smtn
ENSMUSG00000020440	884.376	-0.342157	0.106528	-3.21189	0.00131866	0.0318527	Arf5
ENSMUSG00000020441	94.9505	-0.418759	0.22664	-1.84768	0.0646486	0.313376	2310033P09Rik
ENSMUSG00000020444	242.976	0.0139068	0.178021	0.078119	0.937733	0.978125	Guk1
ENSMUSG00000020448	307.348	-0.0495101	0.109951	-0.450294	0.652498	0.873076	Rnf185
ENSMUSG00000020451	292.487	-0.070972	0.159417	-0.445198	0.656177	0.874716	Limk2
ENSMUSG00000020453	451.03	0.0711021	0.0848558	0.837917	0.402078	0.733944	Patz1
ENSMUSG00000020454	977.111	-0.0310286	0.179855	-0.172521	0.863028	0.953914	Eif4enif1
ENSMUSG00000020455	218.832	-0.108877	0.13146	-0.828214	0.407549	0.737506	Trim11
ENSMUSG00000020456	1431.59	0.172527	0.115868	1.48899	0.136489	0.457254	Ogdh
ENSMUSG00000020457	953.207	0.0572888	0.0895716	0.639586	0.522442	0.808563	Drg1
ENSMUSG00000020458	9160.92	0.105916	0.0735302	1.44044	0.149743	0.474287	Rtn4
ENSMUSG00000020459	240.345	0.374104	0.17251	2.1686	0.0301131	0.211847	Mtif2
ENSMUSG00000020460	4466.5	-0.0807131	0.0970409	-0.831743	0.405554	0.735691	Rps27a
ENSMUSG00000020462	360.262	0.119714	0.126969	0.942861	0.345752	0.68993	Cfap36
ENSMUSG00000020463	999.207	0.216338	0.13097	1.65181	0.0985725	0.391373	Ppp4r3b
ENSMUSG00000020464	591.551	0.258559	0.0936233	2.76169	0.00575022	0.0792368	Pnpt1
ENSMUSG00000020467	2068.17	-0.201822	0.189029	-1.06768	0.285665	0.635844	Efemp1
ENSMUSG00000020471	582.801	-0.169308	0.147203	-1.15016	0.250077	0.602258	Pold2
ENSMUSG00000020472	586.504	-0.418565	0.184866	-2.26415	0.0235647	0.183306	Zkscan17
ENSMUSG00000020473	8833.03	-0.248505	0.0584349	-4.25269	2.11219e-05	0.00190255	Aebp1
ENSMUSG00000020474	302.605	-0.310953	0.159921	-1.94441	0.0518454	0.276639	Polm
ENSMUSG00000020476	1136.93	-0.22044	0.0890723	-2.47484	0.0133295	0.133268	Dbnl
ENSMUSG00000020477	307.552	-0.126968	0.161395	-0.786694	0.431461	0.755115	Mrps24
ENSMUSG00000020482	256.675	0.109779	0.164569	0.667069	0.504728	0.798365	Ccdc117
ENSMUSG00000020483	1798.47	0.0714537	0.0802859	0.88999	0.373471	0.710489	Dynll2
ENSMUSG00000020484	591.412	-0.25578	0.107493	-2.3795	0.017336	0.154331	Xbp1
ENSMUSG00000020485	196.543	-0.182933	0.177006	-1.03348	0.301378	0.648547	Supt4a
ENSMUSG00000020491	63.0518	-0.0603716	0.226351	-0.266717	0.789687	0.925462	2810021J22Rik
ENSMUSG00000020492	439.654	0.169752	0.135103	1.25647	0.208946	0.556924	Ska2
ENSMUSG00000020493	809.416	0.0220133	0.114497	0.192261	0.847538	0.94796	Prr11
ENSMUSG00000020495	351.348	0.0237627	0.115263	0.206161	0.836665	0.944236	Smg8
ENSMUSG00000020496	1999.88	-0.124951	0.07336	-1.70326	0.0885194	0.369512	Rnf187
ENSMUSG00000020513	40.1831	-0.0635012	0.32137	-0.197596	0.843361		Tubd1
ENSMUSG00000020514	242.283	-0.0991958	0.133428	-0.743439	0.457216	0.771202	Mrpl22
ENSMUSG00000020515	503.772	-0.0923617	0.178531	-0.517342	0.604918	0.849225	Cnot8
ENSMUSG00000020516	692.638	0.0338394	0.126591	0.267312	0.789229	0.92515	Rps6kb1
ENSMUSG00000020519	258.637	-0.294386	0.17681	-1.66499	0.0959157	0.385342	Sap30l
ENSMUSG00000020520	481.821	-0.200904	0.0920568	-2.18239	0.0290805	0.207405	Galnt10
ENSMUSG00000020521	295.91	0.0111116	0.166609	0.0666927	0.946826	0.981256	Rnft1
ENSMUSG00000020522	367.627	0.131507	0.16773	0.784039	0.433017	0.756603	Mfap3
ENSMUSG00000020523	455.297	0.0525679	0.109253	0.481159	0.630403	0.860721	Fam114a2
ENSMUSG00000020524	12.5652	-3.85796	1.20273	-3.20766	0.00133819		Gria1
ENSMUSG00000020525	211.55	-0.0767474	0.115002	-0.667356	0.504545	0.798365	Ppm1d
ENSMUSG00000020526	104.192	-0.014785	0.18588	-0.0795407	0.936603	0.977875	Znhit3
ENSMUSG00000020527	354.096	0.117028	0.133371	0.877461	0.380236	0.714927	Myo19
ENSMUSG00000020528	297.459	0.302479	0.106174	2.84891	0.00438691	0.0663752	Prpsap2
ENSMUSG00000020530	1027.09	-0.0203191	0.0728087	-0.279076	0.780187	0.921726	Ggnbp2
ENSMUSG00000020532	1293.53	0.225388	0.180717	1.24719	0.212328	0.561585	Acaca
ENSMUSG00000020534	676.505	0.0829101	0.123147	0.673261	0.500781	0.796244	Shmt1
ENSMUSG00000020536	678.791	-0.164371	0.0809949	-2.0294	0.0424178	0.252204	Llgl1
ENSMUSG00000020537	785.488	0.0547716	0.0709315	0.772176	0.44001	0.761095	Drg2
ENSMUSG00000020538	1066.2	-0.215733	0.0977729	-2.20647	0.0273513	0.200329	Srebf1
ENSMUSG00000020541	122.327	0.695758	0.210383	3.3071	0.000942684	0.0257553	Tom1l1
ENSMUSG00000020544	138.536	-0.131954	0.195139	-0.676208	0.498909	0.795711	Cox11
ENSMUSG00000020546	174.838	0.15636	0.218236	0.716472	0.4737	0.781232	Stxbp4
ENSMUSG00000020547	1031.62	0.00302359	0.0874036	0.0345935	0.972404	0.98951	Bzw2
ENSMUSG00000020549	582.577	0.274669	0.0942028	2.91572	0.00354869	0.0589628	Elac2
ENSMUSG00000020553	42.8215	0.333843	0.283895	1.17594	0.239619		Pctp
ENSMUSG00000020561	320.931	0.172257	0.0961667	1.79123	0.073256	0.333781	Twistnb
ENSMUSG00000020564	84.8342	0.374158	0.185212	2.02016	0.0433669	0.255015	Atxn7l1
ENSMUSG00000020570	880.056	0.247925	0.086658	2.86096	0.00422358	0.0652659	Sypl
ENSMUSG00000020571	3403.62	-0.0827612	0.0751819	-1.10081	0.270978	0.62391	Pdia6
ENSMUSG00000020572	1006.8	0.059272	0.103749	0.571303	0.567794	0.832357	Nampt
ENSMUSG00000020576	265.429	0.193201	0.155927	1.23904	0.215329	0.56484	Nbas
ENSMUSG00000020577	4.8543	0.509599	0.790139	0.644948	0.518961		Tspan13
ENSMUSG00000020580	1271.33	0.122825	0.0816418	1.50443	0.13247	0.451768	Rock2
ENSMUSG00000020585	1998.77	0.0154348	0.0607595	0.25403	0.799472	0.928867	Laptm4a
ENSMUSG00000020589	63.2131	0.220048	0.511152	0.430495	0.666836	0.87788	Fam49a
ENSMUSG00000020590	183.473	-0.0201541	0.158136	-0.127448	0.898586	0.964372	Snx13
ENSMUSG00000020592	1048.38	-0.222489	0.0964272	-2.30733	0.0210367	0.172408	Sdc1
ENSMUSG00000020593	64.4834	-0.77269	0.386918	-1.99704	0.045821	0.26287	Lpin1
ENSMUSG00000020594	1882.39	0.2092	0.144618	1.44657	0.148018	0.471758	Pum2
ENSMUSG00000020598	41.7772	0.623495	0.577766	1.07915	0.280522		Nrcam
ENSMUSG00000020601	294.226	-0.946481	0.203154	-4.65893	3.17853e-06	0.000425481	Trib2
ENSMUSG00000020604	29.6893	-0.346437	0.36759	-0.942455	0.34596		Arsg
ENSMUSG00000020605	259.808	0.0999726	0.131118	0.762461	0.445785	0.763786	Hs1bp3
ENSMUSG00000020607	6.36695	0.73663	0.718164	1.02571	0.305027		Lratd1
ENSMUSG00000020608	380.004	-0.0975527	0.225845	-0.431945	0.665781	0.877658	Smc6
ENSMUSG00000020610	309.778	-0.323389	0.134798	-2.39906	0.0164372	0.14922	Amz2
ENSMUSG00000020611	963.235	0.0710398	0.0811089	0.875857	0.381108	0.714978	Gna13
ENSMUSG00000020612	3883.46	-0.0151197	0.0701203	-0.215626	0.82928	0.940529	Prkar1a
ENSMUSG00000020614	59.1446	-0.222053	0.277063	-0.801455	0.422869	0.74857	Fam20a
ENSMUSG00000020620	33.291	0.250768	0.286843	0.874234	0.381991		Abca8b
ENSMUSG00000020621	84.7215	-0.0871236	0.192155	-0.453404	0.650258	0.871744	Rdh14
ENSMUSG00000020623	225.026	-0.368146	0.141057	-2.60992	0.00905632	0.105036	Map2k6
ENSMUSG00000020627	55.5996	0.506255	0.422646	1.19782	0.230986	0.581215	Klhl29
ENSMUSG00000020628	204.408	-0.171114	0.149195	-1.14692	0.251416	0.604095	Trappc12
ENSMUSG00000020629	292.602	0.0467	0.183564	0.254407	0.799181	0.928684	Adi1
ENSMUSG00000020630	106.528	-0.387803	0.158415	-2.44802	0.0143643	0.139138	Rnaseh1
ENSMUSG00000020633	13.382	0.259492	0.637631	0.406963	0.684035		Dcdc2c
ENSMUSG00000020634	170.034	0.274496	0.1557	1.76298	0.0779036	0.343474	Ubxn2a
ENSMUSG00000020638	36.991	-0.321135	0.284032	-1.13063	0.25821		Cmpk2
ENSMUSG00000020640	164.345	-0.526319	0.244146	-2.15576	0.0311026	0.2146	Itsn2
ENSMUSG00000020641	61.6848	-0.196436	0.303309	-0.647644	0.517215	0.804442	Rsad2
ENSMUSG00000020642	50.2159	-1.1922	0.457615	-2.60526	0.00918046		Rnf144a
ENSMUSG00000020644	230.519	0.0454059	0.222414	0.20415	0.838236	0.944903	Id2
ENSMUSG00000020646	92.9251	0.191096	0.192731	0.991515	0.321434	0.667646	Mboat2
ENSMUSG00000020647	89.0153	-0.0356581	0.228111	-0.156319	0.875781	0.958523	Ncoa1
ENSMUSG00000020648	65.1951	0.107222	0.213165	0.503	0.614964	0.853044	Dus4l
ENSMUSG00000020649	2887.43	0.107547	0.0758021	1.41879	0.15596	0.48412	Rrm2
ENSMUSG00000020650	192.134	0.401924	0.127494	3.15249	0.00161885	0.0375963	Bcap29
ENSMUSG00000020652	117.436	-0.151954	0.169513	-0.896418	0.370029	0.708508	Cenpo
ENSMUSG00000020653	77.4723	0.159505	0.302313	0.527614	0.597768	0.846252	Klf11
ENSMUSG00000020654	126.081	-0.0169511	0.41461	-0.0408844	0.967388	0.987277	Adcy3
ENSMUSG00000020657	82.1794	0.274078	0.327664	0.836461	0.402895	0.734362	Dnajc27
ENSMUSG00000020658	6.2888	1.71719	1.36274	1.2601	0.207634		Efr3b
ENSMUSG00000020659	164.433	0.246424	0.1899	1.29765	0.194408	0.536595	Cbll1
ENSMUSG00000020661	177.138	-0.0317497	0.217586	-0.145918	0.883986	0.960261	Dnmt3a
ENSMUSG00000020664	1118.71	0.062651	0.0861481	0.727248	0.467074	0.778273	Dld
ENSMUSG00000020668	75.466	0.275592	0.268205	1.02754	0.304165	0.650656	Kif3c
ENSMUSG00000020669	40.2855	-0.0101248	0.322199	-0.031424	0.974931		Sh3yl1
ENSMUSG00000020671	1773.44	0.183715	0.0667538	2.75212	0.00592104	0.080603	Rab10
ENSMUSG00000020674	1300.61	0.22839	0.168875	1.35242	0.176242	0.513799	Pxdn
ENSMUSG00000020676	13.2839	0.362698	0.577862	0.627655	0.53023		Ccl11
ENSMUSG00000020677	694.89	0.240108	0.0845455	2.83999	0.00451146	0.0678338	Ddx52
ENSMUSG00000020680	1355.34	-0.0420806	0.0777507	-0.541226	0.588352	0.84228	Taf15
ENSMUSG00000020681	30.0624	-0.518864	0.471115	-1.10135	0.270744		Ace
ENSMUSG00000020682	7.39108	0.226201	0.5844	0.387065	0.698708		Mmp28
ENSMUSG00000020687	1050.76	0.152379	0.123703	1.23181	0.21802	0.568793	Cdc27
ENSMUSG00000020689	66.1403	0.164153	0.298513	0.549902	0.582387	0.839679	Itgb3
ENSMUSG00000020691	205.878	0.122145	0.143137	0.853344	0.393468	0.725928	Mettl2
ENSMUSG00000020692	294.518	-0.0174466	0.156664	-0.111364	0.911328	0.96863	Nle1
ENSMUSG00000020694	825.741	-0.0113343	0.106949	-0.105979	0.915599	0.969001	Tlk2
ENSMUSG00000020695	3108	-0.101513	0.0696014	-1.45849	0.144705	0.467339	Mrc2
ENSMUSG00000020696	104.921	-0.423874	0.195702	-2.16591	0.0303181	0.212763	Rffl
ENSMUSG00000020697	657.117	-0.205799	0.0907635	-2.26742	0.0233646	0.182486	Lig3
ENSMUSG00000020700	782.158	0.114481	0.115366	0.992328	0.321038	0.667277	Map3k3
ENSMUSG00000020705	1108.96	-0.00364676	0.0774641	-0.0470768	0.962452	0.985353	Ddx42
ENSMUSG00000020706	2037.44	0.0603883	0.0647815	0.932184	0.351241	0.694731	Ftsj3
ENSMUSG00000020707	33.2801	-0.443054	0.268703	-1.64886	0.0991763		Rnf135
ENSMUSG00000020708	1543.71	0.153105	0.0695298	2.202	0.0276653	0.201388	Psmc5
ENSMUSG00000020715	763.254	0.0390816	0.132445	0.295077	0.767935	0.9176	Ern1
ENSMUSG00000020716	633.361	0.000268611	0.121634	0.00220836	0.998238	0.99992	Nf1
ENSMUSG00000020718	47.7529	-0.0146234	0.234443	-0.0623749	0.950264		Polg2
ENSMUSG00000020719	8835.59	-0.0382855	0.0856754	-0.446867	0.654971	0.874686	Ddx5
ENSMUSG00000020720	1585.33	0.125706	0.0645341	1.94789	0.0514276	0.276188	Psmd12
ENSMUSG00000020721	455.052	0.125392	0.167183	0.750029	0.453237	0.76874	Helz
ENSMUSG00000020728	58.6575	-0.455386	0.349932	-1.30135	0.193137	0.535363	Cep112
ENSMUSG00000020733	112.282	0.620832	0.226348	2.74283	0.00609129	0.0813128	Slc9a3r1
ENSMUSG00000020736	294.844	-0.139706	0.142368	-0.981298	0.326446	0.672427	Nt5c
ENSMUSG00000020737	1839.91	0.00802661	0.0991565	0.0809488	0.935483	0.977875	Jpt1
ENSMUSG00000020738	2727.41	-0.0446162	0.0681075	-0.655085	0.512413	0.802175	Sumo2
ENSMUSG00000020739	1367.61	0.0124834	0.105331	0.118516	0.905659	0.965707	Nup85
ENSMUSG00000020740	434.494	-0.318527	0.619765	-0.513949	0.607288	0.850115	Gga3
ENSMUSG00000020741	1683.7	0.197058	0.0916166	2.1509	0.0314844	0.216284	Cluh
ENSMUSG00000020743	75.1785	-0.0168714	0.194163	-0.0868927	0.930757	0.975232	Mif4gd
ENSMUSG00000020744	151.555	0.555074	0.186052	2.98343	0.00285035	0.0520296	Slc25a19
ENSMUSG00000020745	2737.89	0.0828483	0.0761418	1.08808	0.27656	0.628968	Pafah1b1
ENSMUSG00000020747	332.281	-0.260338	0.123754	-2.10368	0.0354066	0.230088	Tmem94
ENSMUSG00000020752	141.947	-1.45116	0.377192	-3.84727	0.000119441	0.00621882	Recql5
ENSMUSG00000020755	471.769	-0.0828384	0.219956	-0.376614	0.70646	0.893552	Sap30bp
ENSMUSG00000020758	13.9576	0.462877	0.632839	0.73143	0.464516		Itgb4
ENSMUSG00000020766	911.636	-0.121008	0.118504	-1.02113	0.307194	0.653594	Galk1
ENSMUSG00000020770	268.077	-0.349088	0.144777	-2.41121	0.0158998	0.146645	Unk
ENSMUSG00000020773	495.065	-0.112542	0.188917	-0.595725	0.551359	0.824399	Trim47
ENSMUSG00000020774	24.9127	1.13744	0.392422	2.8985	0.00374948		Aspa
ENSMUSG00000020775	515.654	0.0574668	0.233644	0.245959	0.805714	0.931317	Mrpl38
ENSMUSG00000020776	519.269	-0.30185	0.115453	-2.61449	0.00893608	0.104017	Fbf1
ENSMUSG00000020777	737.584	0.21794	0.11179	1.94955	0.0512297	0.276188	Acox1
ENSMUSG00000020778	142.916	0.436719	0.20263	2.15526	0.0311419	0.214696	Ten1
ENSMUSG00000020780	1139.41	0.0752828	0.05926	1.27038	0.203949	0.550298	Srp68
ENSMUSG00000020781	183.538	0.0843597	0.158317	0.532854	0.594135	0.844085	Tsen54
ENSMUSG00000020782	19.2422	0.359214	0.530667	0.67691	0.498463		Llgl2
ENSMUSG00000020783	434.753	0.000797515	0.0846517	0.00942114	0.992483	0.997507	Ncbp3
ENSMUSG00000020785	51.6733	0.0782904	0.278611	0.281003	0.778708		Camkk1
ENSMUSG00000020788	4.17409	-0.409294	0.828231	-0.494179	0.62118		Atp2a3
ENSMUSG00000020790	1147.79	0.0672426	0.108982	0.617006	0.537231	0.817899	Ankfy1
ENSMUSG00000020792	361.913	-0.280227	0.194697	-1.4393	0.150066	0.474364	Exoc7
ENSMUSG00000020794	599.207	0.107743	0.0922545	1.16789	0.242852	0.593814	Ube2g1
ENSMUSG00000020801	68.182	-0.0841096	0.227901	-0.369062	0.712081	0.896426	Med31
ENSMUSG00000020802	802.598	0.0478456	0.0784375	0.609984	0.541872	0.820247	Ube2o
ENSMUSG00000020803	591.068	0.0106067	0.114447	0.0926776	0.92616	0.973161	Txndc17
ENSMUSG00000020806	224.511	-0.253669	0.158402	-1.60142	0.109283	0.413891	Rhbdf2
ENSMUSG00000020807	98.0516	-0.444674	1.35101	-0.329142	0.742048	0.90847	4933427D14Rik
ENSMUSG00000020808	805.857	-0.105371	0.133347	-0.790201	0.42941	0.753422	Pimreg
ENSMUSG00000020810	14.5397	-0.154375	0.574028	-0.268933	0.787981		Cygb
ENSMUSG00000020814	398.927	-0.14095	0.119027	-1.18418	0.236341	0.587226	Mxra7
ENSMUSG00000020817	950.281	0.110473	0.101334	1.09018	0.275634	0.628968	Rabep1
ENSMUSG00000020818	440.738	0.47454	0.18504	2.56453	0.0103316	0.113051	Mfsd11
ENSMUSG00000020821	2432.39	-0.0720317	0.0614942	-1.17136	0.241455	0.592685	Kif1c
ENSMUSG00000020823	1389.12	-0.0742662	0.0816476	-0.909594	0.363037	0.703794	Sec14l1
ENSMUSG00000020826	26.3251	-1.08623	1.06523	-1.01971	0.307865		Nos2
ENSMUSG00000020827	900.091	-0.11609	0.135662	-0.855733	0.392146	0.724771	Mink1
ENSMUSG00000020828	260.002	0.0947813	0.143553	0.660253	0.509092	0.800655	Pld2
ENSMUSG00000020829	37.9015	-0.116601	0.383302	-0.304201	0.760974		Slc46a1
ENSMUSG00000020831	227.27	-0.239246	0.126317	-1.89401	0.0582239	0.295305	0610010K14Rik
ENSMUSG00000020832	168.86	0.0896418	0.128621	0.696947	0.485836	0.787998	Eral1
ENSMUSG00000020834	152.562	0.00773383	0.158971	0.0486493	0.961199	0.984994	Dhrs13
ENSMUSG00000020840	578.044	0.129936	0.117841	1.10264	0.270185	0.623275	Blmh
ENSMUSG00000020841	1096.02	-0.189033	0.0908043	-2.08176	0.0373646	0.237609	Cpd
ENSMUSG00000020843	289.214	0.050077	0.144626	0.346253	0.729152	0.903868	Timm22
ENSMUSG00000020844	627.519	0.153379	0.0896879	1.71014	0.0872394	0.366527	Nxn
ENSMUSG00000020846	129.094	0.465847	0.149017	3.12613	0.00177123	0.0394251	Rflnb
ENSMUSG00000020847	8.41435	0.743439	0.769723	0.965853	0.334118		Rph3al
ENSMUSG00000020849	8663.54	0.0295573	0.0522071	0.566155	0.571288	0.834387	Ywhae
ENSMUSG00000020850	4610.46	0.119207	0.104744	1.13808	0.255088	0.608096	Prpf8
ENSMUSG00000020857	3734.92	-0.0542929	0.107817	-0.503565	0.614567	0.853044	Nme2
ENSMUSG00000020859	1282.66	0.079702	0.111558	0.714446	0.474951	0.781958	Spag9
ENSMUSG00000020863	1166.72	-0.0217772	0.116936	-0.186231	0.852263	0.949499	Luc7l3
ENSMUSG00000020864	773.286	0.0399914	0.0876453	0.456287	0.648184	0.870689	Ankrd40
[truncated: 9,957 more rows]
